# Supplementary material for: Investigating the kinetics of the intramolecular H-migration reaction class of methyl-ester peroxy radicals in low-temperature oxidation mechanisms of biodiesel
Source: Royal Society of Chemistry journal article supplement (doi:10.1039/d3cp03376g), 2023-01-01
Supplement: d3cp03376g2.pdf [file d3cp03376g2.pdf]

## Supporting Information I

### Investigating the kinetics of the intramolecular H-migration reaction class of methyl-ester peroxy radicals in low-temperature oxidation mechanisms of biodiesel

Tao Li<sup>a</sup>, Juanqin Li<sup>a</sup>, Siyu Chen<sup>a</sup>, Quan Zhu<sup>\*a,b</sup>, Zerong Li<sup>c</sup>

<sup>a</sup>School of Chemical Engineering, Sichuan University, Chengdu 610065, PR China

<sup>b</sup>Engineering Research Center of Combustion and Cooling for Aerospace Power, Ministry of Education, Sichuan University, Chengdu, Sichuan 610065, PR China

<sup>c</sup>College of Chemistry, Sichuan University, Chengdu 610064, PR China

\*To whom correspondence should be addressed. E-mail: qzhu@scu.edu.cn (Quan Zhu)

#### Contents:

#### 1. The structures of the studied reactants and a list of reactions

**Figure S1.** The structures of the studied methyl-ester peroxy radicals

**Table S1.** A list of reactions of intramolecular H-migration class in this work.

#### 2. T1 diagnostic values for some representative species in this work

**Table S2.** T1 diagnostic values for some reactants, transition states and products.

#### 3. Figure S2-S4. Potential energy profiles for internal rotations

#### 4. The calculated values of the barrier width $L$ for all studied reactions

**Table S3.** Calculated barrier width  $L(\text{Å})$  for all the reactions studied in this work.

#### 5. Lennard-Jones parameters used in this work

**Table S4.** Lennard-Jones parameters  $\sigma(\text{Å})$  and  $\varepsilon(\text{K})$  used in this work.

#### 6. Energy barriers for intramolecular H-migration reactions of methyl-ester peroxy radicals

**Table S5.** Energy barriers for all the H-migration reactions in this work.

#### 7. High-pressure-limit rate constants of studied reactions

**Table S6.** Calculated high-pressure-limit rate constants, rate rules, ratios of rate constants of reactions to the average values of the reactions and uncertainty factor values of the rate rule in subclasses of (L, L).

**Table S7.** Calculated high-pressure-limit rate constants, rate rules, ratios of rate constants of reactions to the average values of the reaction and uncertainty factor values of the rate rule in subclasses of (L, R).

**Table S8.** Calculated high-pressure-limit rate constants, rate rules, ratios of rate constants of reactions to the average values of the reaction and uncertainty factor values of the rate rule in subclasses of (R, L).

#### 8. Pressure-dependent rate constants of studied reactions

**Table S9.** Calculated pressure-dependent rate constants, rate rules, ratios of rate constants of reactions to the average values of the reaction and uncertainty factor values of the rate rule in subclasses of (L, L) at different pressures.

**Table S10.** Calculated pressure-dependent rate constants, rate rules, ratios of rate constants of reactions to the average values of the reaction and uncertainty factor values of the rate rule in subclasses of (L, R) at different pressures

**Table S11.** Calculated pressure-dependent rate constants, rate rules, ratios of rate constants of reactions to the average values of the reaction and uncertainty factor values of the rate rule in subclasses of (R, L) at different pressures

## **9. Cartesian coordinates for all reactants, transition states and products**

# 1. The structures of the studied reactants and a list of reactions

## Straight methyl-ester peroxy radicals

•OO group on the left alkyl chain

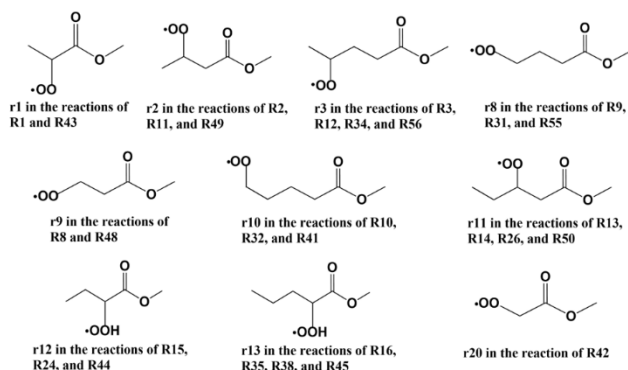

•OO group connect to the right methoxy group

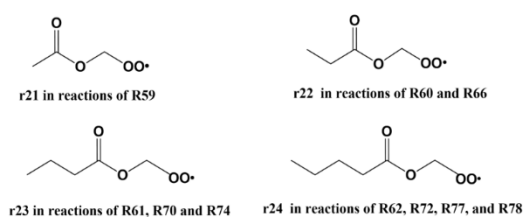

## Branched-methyl ester peroxy radicals

•OO group connect to the left alkyl chain

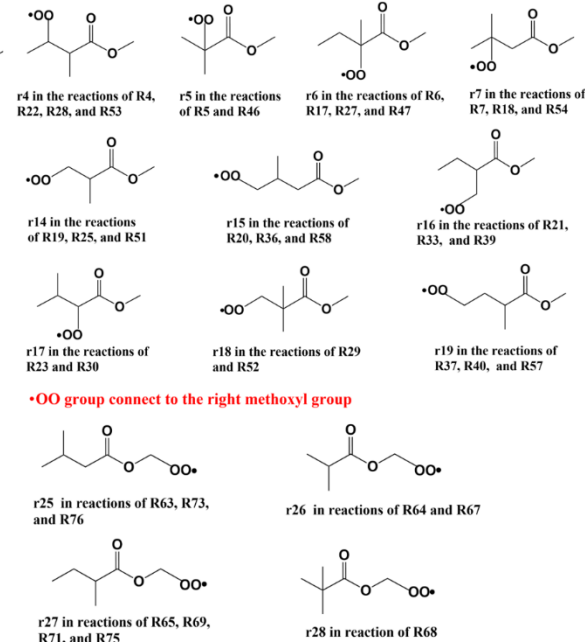

Figure S1. The structures of the studied methyl-ester peroxy radicals.

Table S1. A list of the reactions of intramolecular H-migration class in this work.

| No. | Reaction equation                                                                                                                                                                                           |
|-----|-------------------------------------------------------------------------------------------------------------------------------------------------------------------------------------------------------------|
| R1  | $\text{CH}_3\text{CH}(\text{OO}\cdot)\text{C}(=\text{O})\text{OCH}_3 \rightarrow \text{C}\cdot\text{H}_2\text{CH}(\text{OOH})\text{C}(=\text{O})\text{OCH}_3$                                               |
| R2  | $\text{CH}_3\text{CH}(\text{OO}\cdot)\text{CH}_2\text{C}(=\text{O})\text{OCH}_3 \rightarrow \text{C}\cdot\text{H}_2\text{CH}(\text{OOH})\text{CH}_2\text{C}(=\text{O})\text{OCH}_3$                         |
| R3  | $\text{CH}_3\text{CH}(\text{OO}\cdot)\text{CH}_2\text{CH}_2\text{C}(=\text{O})\text{OCH}_3 \rightarrow \text{C}\cdot\text{H}_2\text{CH}(\text{OOH})\text{CH}_2\text{CH}_2\text{C}(=\text{O})\text{OCH}_3$   |
| R4  | $\text{CH}_3\text{CH}(\text{OO}\cdot)\text{CH}(\text{CH}_3)\text{C}(=\text{O})\text{OCH}_3 \rightarrow \text{C}\cdot\text{H}_2\text{CH}(\text{OOH})\text{CH}(\text{CH}_3)\text{C}(=\text{O})\text{OCH}_3$   |
| R5  | $(\text{CH}_3)_2\text{C}(\text{OO}\cdot)\text{C}(=\text{O})\text{OCH}_3 \rightarrow \text{C}\cdot\text{H}_2(\text{CH}_3)\text{C}(\text{OOH})\text{C}(=\text{O})\text{OCH}_3$                                |
| R6  | $\text{CH}_3\text{CH}_2\text{C}(\text{OO}\cdot)(\text{CH}_3)\text{C}(=\text{O})\text{OCH}_3 \rightarrow \text{CH}_3\text{CH}_2\text{C}(\text{OOH})(\text{C}\cdot\text{H}_2)\text{C}(=\text{O})\text{OCH}_3$ |
| R7  | $(\text{CH}_3)_2\text{C}(\text{OO}\cdot)\text{CH}_2\text{C}(=\text{O})\text{OCH}_3 \rightarrow \text{C}\cdot\text{H}_2(\text{CH}_3)\text{C}(\text{OOH})\text{CH}_2\text{C}(=\text{O})\text{OCH}_3$          |
| R8  | $\text{CH}_2(\text{OO}\cdot)\text{CH}_2\text{C}(=\text{O})\text{OCH}_3 \rightarrow \text{CH}_2(\text{OOH})\text{C}\cdot\text{HC}(=\text{O})\text{OCH}_3$                                                    |
| R9  | $\text{CH}_2(\text{OO}\cdot)\text{CH}_2\text{CH}_2\text{C}(=\text{O})\text{OCH}_3 \rightarrow \text{CH}_2(\text{OOH})\text{C}\cdot\text{HCH}_2\text{C}(=\text{O})\text{OCH}_3$                              |
| R10 | $\text{CH}_2(\text{OO}\cdot)\text{CH}_2\text{CH}_2\text{CH}_2\text{C}(=\text{O})\text{OCH}_3 \rightarrow \text{CH}_2(\text{OOH})\text{C}\cdot\text{HCH}_2\text{CH}_2\text{C}(=\text{O})\text{OCH}_3$        |
| R11 | $\text{CH}_3\text{CH}(\text{OO}\cdot)\text{CH}_2\text{C}(=\text{O})\text{OCH}_3 \rightarrow \text{CH}_3\text{CH}(\text{OOH})\text{C}\cdot\text{HC}(=\text{O})\text{OCH}_3$                                  |
| R12 | $\text{CH}_3\text{CH}(\text{OO}\cdot)\text{CH}_2\text{CH}_2\text{C}(=\text{O})\text{OCH}_3 \rightarrow \text{CH}_3\text{CH}(\text{OOH})\text{C}\cdot\text{HCH}_2\text{C}(=\text{O})\text{OCH}_3$            |
| R13 | $\text{CH}_3\text{CH}_2\text{CH}(\text{OO}\cdot)\text{CH}_2\text{C}(=\text{O})\text{OCH}_3 \rightarrow \text{CH}_3\text{CH}_2\text{CH}(\text{OOH})\text{C}\cdot\text{HC}(=\text{O})\text{OCH}_3$            |
| R14 | $\text{CH}_3\text{CH}_2\text{CH}(\text{OO}\cdot)\text{CH}_2\text{C}(=\text{O})\text{OCH}_3 \rightarrow \text{CH}_3\text{C}\cdot\text{HCH}(\text{OOH})\text{CH}_2\text{C}(=\text{O})\text{OCH}_3$            |
| R15 | $\text{CH}_3\text{CH}_2\text{CH}(\text{OO}\cdot)\text{C}(=\text{O})\text{OCH}_3 \rightarrow \text{CH}_3\text{C}\cdot\text{HCH}(\text{OOH})\text{C}(=\text{O})\text{OCH}_3$                                  |
| R16 | $\text{CH}_3\text{CH}_2\text{CH}_2\text{CH}(\text{OO}\cdot)\text{C}(=\text{O})\text{OCH}_3 \rightarrow \text{CH}_3\text{CH}_2\text{C}\cdot\text{HCH}(\text{OOH})\text{C}(=\text{O})\text{OCH}_3$            |
| R17 | $\text{CH}_3\text{CH}_2\text{C}(\text{OO}\cdot)(\text{CH}_3)\text{C}(=\text{O})\text{OCH}_3 \rightarrow \text{CH}_3\text{C}\cdot\text{HC}(\text{OOH})(\text{CH}_3)\text{C}(=\text{O})\text{OCH}_3$          |
| R18 | $(\text{CH}_3)_2\text{C}(\text{OO}\cdot)\text{CH}_2\text{C}(=\text{O})\text{OCH}_3 \rightarrow (\text{CH}_3)_2\text{C}(\text{OOH})\text{C}\cdot\text{H}(=\text{O})\text{OCH}_3$                             |
| R19 | $\text{CH}_3\text{CH}(\text{CH}_2\text{OO}\cdot)\text{C}(=\text{O})\text{OCH}_3 \rightarrow \text{CH}_3\text{C}\cdot(\text{CH}_2\text{OOH})\text{C}(=\text{O})\text{OCH}_3$                                 |
| R20 | $\text{CH}_3\text{CH}(\text{CH}_2\text{OO}\cdot)\text{CH}_2\text{C}(=\text{O})\text{OCH}_3 \rightarrow \text{CH}_3\text{C}\cdot(\text{CH}_2\text{OOH})\text{CH}_2\text{C}(=\text{O})\text{OCH}_3$           |
| R21 | $\text{CH}_3\text{CH}_2\text{CH}(\text{CH}_2\text{OO}\cdot)\text{C}(=\text{O})\text{OCH}_3 \rightarrow \text{CH}_3\text{CH}_2\text{C}\cdot(\text{CH}_2\text{OOH})\text{C}(=\text{O})\text{OCH}_3$           |
| R22 | $\text{CH}_3\text{CH}(\text{OO}\cdot)\text{CH}(\text{CH}_3)\text{C}(=\text{O})\text{OCH}_3 \rightarrow \text{CH}_3\text{CH}(\text{OOH})\text{C}\cdot(\text{CH}_3)\text{C}(=\text{O})\text{OCH}_3$           |
| R23 | $(\text{CH}_3)_2\text{CHCH}(\text{OO}\cdot)\text{C}(=\text{O})\text{OCH}_3 \rightarrow (\text{CH}_3)_2\text{C}\cdot\text{CH}(\text{OOH})\text{C}(=\text{O})\text{OCH}_3$                                    |
| R24 | $\text{CH}_3\text{CH}_2\text{CH}(\text{OO}\cdot)\text{C}(=\text{O})\text{OCH}_3 \rightarrow \text{C}\cdot\text{H}_2\text{CH}_2\text{CH}(\text{OOH})\text{C}(=\text{O})\text{OCH}_3$                         |
| R25 | $\text{CH}_3\text{CH}(\text{CH}_2\text{OO}\cdot)\text{C}(=\text{O})\text{OCH}_3 \rightarrow \text{C}\cdot\text{H}_2\text{CH}(\text{CH}_2\text{OOH})\text{C}(=\text{O})\text{OCH}_3$                         |
| R26 | $\text{CH}_3\text{CH}_2\text{CH}(\text{OO}\cdot)\text{CH}_2\text{C}(=\text{O})\text{OCH}_3 \rightarrow \text{C}\cdot\text{H}_2\text{CH}_2\text{CH}(\text{OOH})\text{CH}_2\text{C}(=\text{O})\text{OCH}_3$   |
| R27 | $\text{CH}_3\text{CH}_2\text{C}(\text{OO}\cdot)(\text{CH}_3)\text{C}(=\text{O})\text{OCH}_3 \rightarrow \text{C}\cdot\text{H}_2\text{CH}_2\text{C}(\text{OOH})(\text{CH}_3)\text{C}(=\text{O})\text{OCH}_3$ |
| R28 | $\text{CH}_3\text{CH}(\text{OO}\cdot)\text{CH}(\text{CH}_3)\text{C}(=\text{O})\text{OCH}_3 \rightarrow \text{CH}_3\text{CH}(\text{OOH})\text{CH}(\text{C}\cdot\text{H}_2)\text{C}(=\text{O})\text{OCH}_3$   |
| R29 | $(\text{CH}_3)_2\text{C}(\text{CH}_2\text{OO}\cdot)\text{C}(=\text{O})\text{OCH}_3 \rightarrow \text{C}\cdot\text{H}_2(\text{CH}_3)\text{C}(\text{CH}_2\text{OOH})\text{C}(=\text{O})\text{OCH}_3$          |
| R30 | $(\text{CH}_3)_2\text{CHCH}(\text{OO}\cdot)\text{C}(=\text{O})\text{OCH}_3 \rightarrow \text{C}\cdot\text{H}_2(\text{CH}_3)\text{CHCH}(\text{OOH})\text{C}(=\text{O})\text{OCH}_3$                          |



|      |       |
|------|-------|
| TS59 | 0.021 |
| p41  | 0.016 |
| p58  | 0.016 |

<sup>a</sup>T<sub>1</sub> diagnostic value were calculated at the CCSD(T)/cc-pVTZ level.

### 3. Figure S2-S4. Potential energy profiles for internal rotations

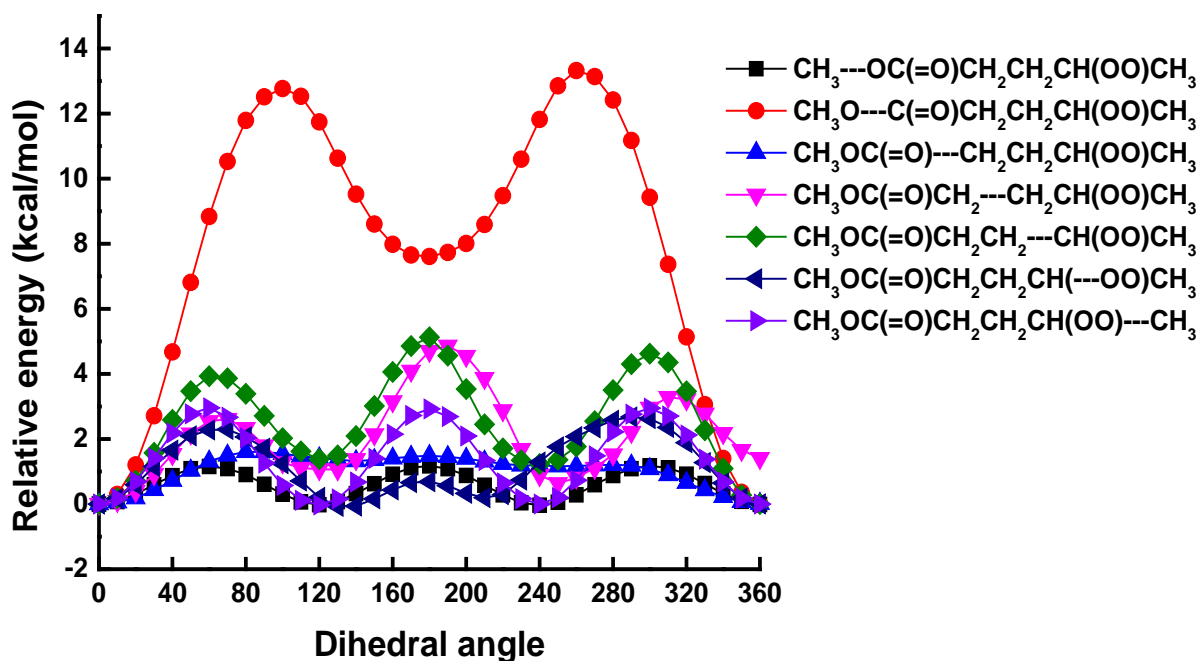

Figure S2. Potential energy profiles of the reactant for internal rotations in reaction R3 at M06-2X/6-311++G(d,p) level.

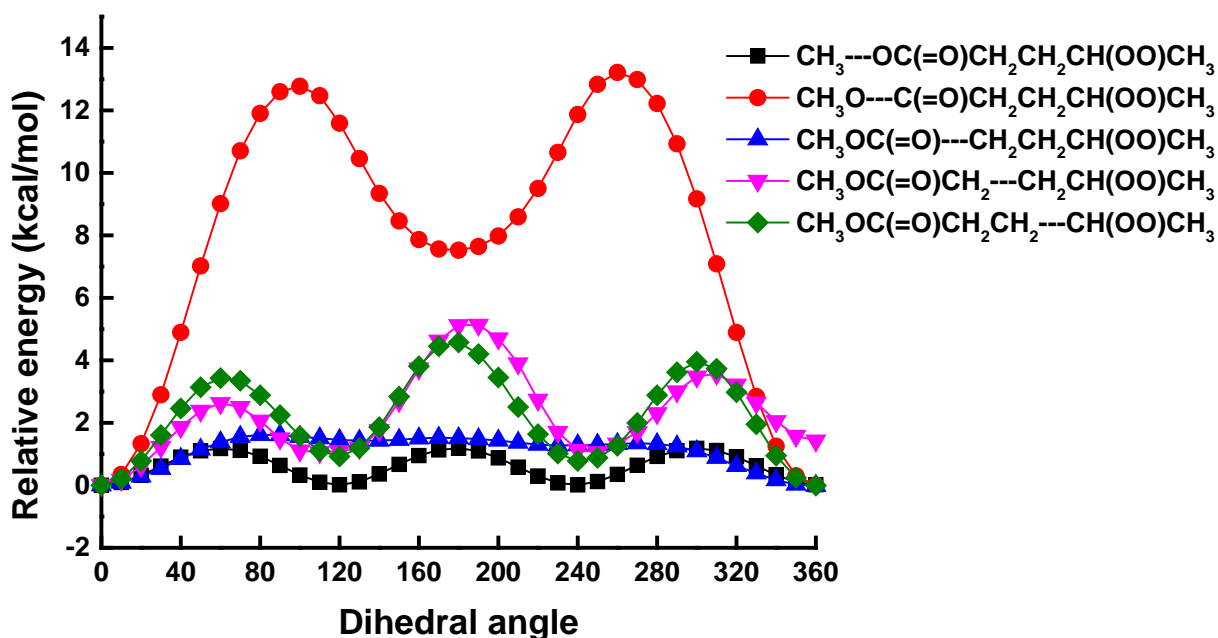

Figure S3. Potential energy profiles of the transition state for internal rotations in reaction R3 at M06-2X/6-311++G(d,p) level.

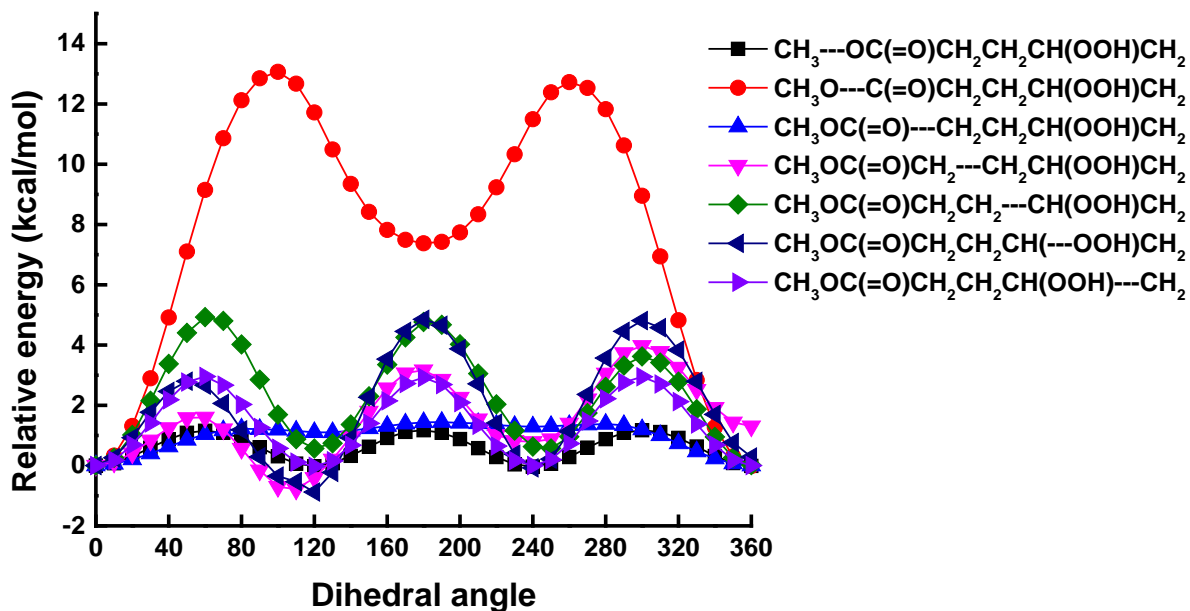

**Figure S4.** Potential energy profiles of the product for internal rotations in reaction R3 at M06-2X/6-311++G(d,p) level.

#### 4. The calculated values of the barrier width $L$ for all studied reactions

**Table S3.** Calculated barrier width  $L$  (Å) for all the reactions in this work.

| Reactions | Barrier width $L$ | Reactions | Barrier width $L$ | Reactions | Barrier width $L$ |
|-----------|-------------------|-----------|-------------------|-----------|-------------------|
| R1        | 1.07              | R28       | 0.89              | R55       | 0.89              |
| R2        | 1.04              | R29       | 0.89              | R56       | 0.91              |
| R3        | 1.02              | R30       | 0.87              | R57       | 0.83              |
| R4        | 1.03              | R31       | 0.92              | R58       | 0.93              |
| R5        | 1.11              | R32       | 0.87              | R59       | 1.17              |
| R6        | 1.13              | R33       | 0.95              | R60       | 1.09              |
| R7        | 1.03              | R34       | 1.01              | R61       | 1.09              |
| R8        | 0.91              | R35       | 0.98              | R62       | 1.09              |
| R9        | 1.03              | R36       | 0.93              | R63       | 1.05              |
| R10       | 1.03              | R37       | 0.93              | R64       | 1.13              |
| R11       | 0.91              | R38       | 0.95              | R65       | 1.13              |
| R12       | 1.00              | R39       | 0.76              | R66       | 0.86              |
| R13       | 0.94              | R40       | 0.83              | R67       | 0.83              |
| R14       | 1.05              | R41       | 0.90              | R68       | 0.77              |
| R15       | 1.03              | R42       | 1.13              | R69       | 0.81              |
| R16       | 1.08              | R43       | 1.09              | R70       | 0.85              |
| R17       | 1.07              | R44       | 1.15              | R71       | 0.81              |
| R18       | 0.90              | R45       | 1.13              | R72       | 0.99              |
| R19       | 0.98              | R46       | 1.15              | R73       | 0.96              |
| R20       | 1.03              | R47       | 1.16              | R74       | 0.61              |

|     |      |     |      |     |      |
|-----|------|-----|------|-----|------|
| R21 | 0.98 | R48 | 1.06 | R75 | 0.52 |
| R22 | 0.99 | R49 | 1.07 | R76 | 0.6  |
| R23 | 1.13 | R50 | 1.07 | R77 | 0.57 |
| R24 | 0.99 | R51 | 1.03 | R78 | 0.78 |
| R25 | 1.02 | R52 | 1.01 |     |      |
| R26 | 0.98 | R53 | 1.03 |     |      |
| R27 | 1.06 | R54 | 1.10 |     |      |

## 5. Lennard-Jones parameters used in this work

**Table S4.** Lennard-Jones parameters  $\sigma$  (Å) and  $\epsilon$  (K) used in this work [1].

|            | Ar   | C <sub>4</sub> H <sub>7</sub> O <sub>4</sub> <sup>a</sup> | C <sub>5</sub> H <sub>9</sub> O <sub>4</sub> <sup>b</sup> | C <sub>6</sub> H <sub>11</sub> O <sub>4</sub> <sup>c</sup> | C <sub>6</sub> H <sub>11</sub> O <sub>4</sub> <sup>d</sup> |
|------------|------|-----------------------------------------------------------|-----------------------------------------------------------|------------------------------------------------------------|------------------------------------------------------------|
| $\sigma$   | 3.47 | 6.08                                                      | 6.37                                                      | 6.67                                                       | 6.57                                                       |
| $\epsilon$ | 114  | 455.19                                                    | 474.91                                                    | 493.13                                                     | 491.50                                                     |

<sup>a</sup> Represents CH<sub>3</sub>CH(OO·)C(=O)OCH<sub>3</sub> radical.

<sup>b</sup> Represents CH<sub>3</sub>CH(OO·)CH<sub>2</sub>C(=O)OCH<sub>3</sub> radical.

<sup>c</sup> Represents CH<sub>3</sub>CH(OO·)CH<sub>2</sub>CH<sub>2</sub>C(=O)OCH<sub>3</sub> radical.

<sup>d</sup> Represents (CH<sub>3</sub>)<sub>3</sub>CC(=O)OCH<sub>2</sub>(OO·) radical.

[1] Wang H, Frenklach M. Transport properties of polycyclic aromatic hydrocarbons for flame modeling. *Combust Flame* 1994;96:163-170.

## 6. Energy barriers for intramolecular H-migration reactions of methyl-ester peroxy radicals

**Table S5.** Energy barriers for all the H-migration reactions in this work (kcal/mol).

| Reaction subclass | No. | Reaction equation                                                                                                                                                          | Energy barriers                            |
|-------------------|-----|----------------------------------------------------------------------------------------------------------------------------------------------------------------------------|--------------------------------------------|
| 1, 4-H(p)-(L, L)  | R1  | CH <sub>3</sub> CH(OO·)C(=O)OCH <sub>3</sub> → C·H <sub>2</sub> CH(OOH)C(=O)OCH <sub>3</sub>                                                                               | 36.75                                      |
|                   | R2  | CH <sub>3</sub> CH(OO·)CH <sub>2</sub> C(=O)OCH <sub>3</sub> → C·H <sub>2</sub> CH(OOH)CH <sub>2</sub> C(=O)OCH <sub>3</sub>                                               | 36.59                                      |
|                   | R3  | CH <sub>3</sub> CH(OO·)CH <sub>2</sub> CH <sub>2</sub> C(=O)OCH <sub>3</sub> → C·H <sub>2</sub> CH(OOH)CH <sub>2</sub> CH <sub>2</sub> C(=O)OCH <sub>3</sub>               | 35.69                                      |
|                   | R4  | CH <sub>3</sub> CH(OO·)CH(CH <sub>3</sub> )C(=O)OCH <sub>3</sub> → C·H <sub>2</sub> CH(OOH)CH(CH <sub>3</sub> )C(=O)OCH <sub>3</sub>                                       | 35.12                                      |
|                   | R5  | (CH <sub>3</sub> ) <sub>2</sub> C(OO·)C(=O)OCH <sub>3</sub> → C·H <sub>2</sub> (CH <sub>3</sub> )C(OOH)C(=O)OCH <sub>3</sub>                                               | 37.39                                      |
|                   | R6  | CH <sub>3</sub> CH <sub>2</sub> C(OO·)(CH <sub>3</sub> )C(=O)OCH <sub>3</sub> → CH <sub>3</sub> CH <sub>2</sub> C(OOH)(C·H <sub>2</sub> )C(=O)OCH <sub>3</sub>             | 37.64                                      |
|                   | R7  | (CH <sub>3</sub> ) <sub>2</sub> C(OO·)CH <sub>2</sub> C(=O)OCH <sub>3</sub> → C·H <sub>2</sub> (CH <sub>3</sub> )C(OOH)CH <sub>2</sub> C(=O)OCH <sub>3</sub>               | 36.63                                      |
|                   |     |                                                                                                                                                                            | <b>36.54<sup>a</sup>, 2.52<sup>b</sup></b> |
| 1, 4-H(s)-(L, L)  | R8  | CH <sub>2</sub> (OO·)CH <sub>2</sub> C(=O)OCH <sub>3</sub> → CH <sub>2</sub> (OOH)C·HC(=O)OCH <sub>3</sub>                                                                 | 33.98                                      |
|                   | R9  | CH <sub>2</sub> (OO·)CH <sub>2</sub> CH <sub>2</sub> C(=O)OCH <sub>3</sub> → CH <sub>2</sub> (OOH)C·HCH <sub>2</sub> C(=O)OCH <sub>3</sub>                                 | 32.99                                      |
|                   | R10 | CH <sub>2</sub> (OO·)CH <sub>2</sub> CH <sub>2</sub> CH <sub>2</sub> C(=O)OCH <sub>3</sub> → CH <sub>2</sub> (OOH)C·HCH <sub>2</sub> CH <sub>2</sub> C(=O)OCH <sub>3</sub> | 32.42                                      |
|                   | R11 | CH <sub>3</sub> CH(OO·)CH <sub>2</sub> C(=O)OCH <sub>3</sub> → CH <sub>3</sub> CH(OOH)C·HC(=O)OCH <sub>3</sub>                                                             | 34.65                                      |
|                   | R12 | CH <sub>3</sub> CH(OO·)CH <sub>2</sub> CH <sub>2</sub> C(=O)OCH <sub>3</sub> → CH <sub>3</sub> CH(OOH)C·HCH <sub>2</sub> C(=O)OCH <sub>3</sub>                             | 32.70                                      |
|                   | R13 | CH <sub>3</sub> CH <sub>2</sub> CH(OO·)CH <sub>2</sub> C(=O)OCH <sub>3</sub> → CH <sub>3</sub> CH <sub>2</sub> CH(OOH)C·HC(=O)OCH <sub>3</sub>                             | 34.56                                      |
|                   | R14 | CH <sub>3</sub> CH <sub>2</sub> CH(OO·)CH <sub>2</sub> C(=O)OCH <sub>3</sub> → CH <sub>3</sub> C·HCH(OOH)CH <sub>2</sub> C(=O)OCH <sub>3</sub>                             | 32.74                                      |
|                   | R15 | CH <sub>3</sub> CH <sub>2</sub> CH(OO·)C(=O)OCH <sub>3</sub> → CH <sub>3</sub> C·HCH(OOH)C(=O)OCH <sub>3</sub>                                                             | 31.72                                      |
|                   | R16 | CH <sub>3</sub> CH <sub>2</sub> CH <sub>2</sub> CH(OO·)C(=O)OCH <sub>3</sub> → CH <sub>3</sub> CH <sub>2</sub> C·HCH(OOH)C(=O)OCH <sub>3</sub>                             | 31.22                                      |
|                   | R17 | CH <sub>3</sub> CH <sub>2</sub> C(OO·)(CH <sub>3</sub> )C(=O)OCH <sub>3</sub> → CH <sub>3</sub> C·HC(OOH)(CH <sub>3</sub> )C(=O)OCH <sub>3</sub>                           | 30.77                                      |
|                   | R18 | (CH <sub>3</sub> ) <sub>2</sub> C(OO·)CH <sub>2</sub> C(=O)OCH <sub>3</sub> → (CH <sub>3</sub> ) <sub>2</sub> C(OOH)C·H(=O)OCH <sub>3</sub>                                | 33.85                                      |
|                   |     |                                                                                                                                                                            | <b>32.87<sup>a</sup>, 3.88<sup>b</sup></b> |





|                  |     |                                                                                                                                                                                                               |                                            |
|------------------|-----|---------------------------------------------------------------------------------------------------------------------------------------------------------------------------------------------------------------|--------------------------------------------|
|                  | R68 | $(\text{CH}_3)_3\text{CC}(=\text{O})\text{OCH}_2(\text{OO}\cdot) \rightarrow \text{C}\cdot\text{H}_2(\text{CH}_3)_2\text{CC}(=\text{O})\text{OCH}_2(\text{OOH})$                                              | 24.16                                      |
|                  | R69 | $\text{CH}_3\text{CH}_2\text{CH}(\text{CH}_3)\text{C}(=\text{O})\text{OCH}_2(\text{OO}\cdot) \rightarrow \text{CH}_3\text{CH}_2\text{CH}(\text{C}\cdot\text{H}_2)\text{C}(=\text{O})\text{OCH}_2(\text{OOH})$ | 24.29                                      |
|                  |     |                                                                                                                                                                                                               | <b>24.96<sup>a</sup>, 2.18<sup>b</sup></b> |
| 1, 7-H(s)-(R, L) | R70 | $\text{CH}_3\text{CH}_2\text{CH}_2\text{C}(=\text{O})\text{OCH}_2(\text{OO}\cdot) \rightarrow \text{CH}_3\text{C}\cdot\text{HCH}_2\text{C}(=\text{O})\text{OCH}_2(\text{OOH})$                                | 22.46                                      |
|                  | R71 | $\text{CH}_3\text{CH}_2\text{CH}(\text{CH}_3)\text{C}(=\text{O})\text{OCH}_2(\text{OO}\cdot) \rightarrow \text{CH}_3\text{C}\cdot\text{HCH}(\text{CH}_3)\text{C}(=\text{O})\text{OCH}_2(\text{OOH})$          | 21.62                                      |
|                  | R72 | $\text{CH}_3\text{CH}_2\text{CH}_2\text{CH}_2\text{C}(=\text{O})\text{OCH}_2(\text{OO}\cdot) \rightarrow \text{CH}_3\text{CH}_2\text{C}\cdot\text{HCH}_2\text{C}(=\text{O})\text{OCH}_2(\text{OOH})$          | 22.51                                      |
|                  |     |                                                                                                                                                                                                               | <b>22.20<sup>a</sup>, 0.89<sup>b</sup></b> |
| 1, 7-H(t)-(R, L) | R73 | $(\text{CH}_3)_2\text{CHCH}_2\text{C}(=\text{O})\text{OCH}_2(\text{OO}\cdot) \rightarrow (\text{CH}_3)_2\text{C}\cdot\text{CH}_2\text{C}(=\text{O})\text{OCH}_2(\text{OOH})$                                  | 19.36                                      |
|                  |     |                                                                                                                                                                                                               | <b>19.36<sup>a</sup>, 0.00<sup>b</sup></b> |
| 1, 8-H(p)-(R, L) | R74 | $\text{CH}_3\text{CH}_2\text{CH}_2\text{C}(=\text{O})\text{OCH}_2(\text{OO}\cdot) \rightarrow \text{C}\cdot\text{H}_2\text{CH}_2\text{CH}_2\text{C}(=\text{O})\text{OCH}_2(\text{OOH})$                       | 20.83                                      |
|                  | R75 | $\text{CH}_3\text{CH}_2\text{CH}(\text{CH}_3)\text{C}(=\text{O})\text{OCH}_2(\text{OO}\cdot) \rightarrow \text{C}\cdot\text{H}_2\text{CH}_2\text{CH}(\text{CH}_3)\text{C}(=\text{O})\text{OCH}_2(\text{OOH})$ | 18.99                                      |
|                  | R76 | $(\text{CH}_3)_2\text{CHCH}_2\text{C}(=\text{O})\text{OCH}_2(\text{OO}\cdot) \rightarrow \text{C}\cdot\text{H}_2(\text{CH}_3)\text{CHCH}_2\text{C}(=\text{O})\text{OCH}_2(\text{OOH})$                        | 20.83                                      |
|                  |     |                                                                                                                                                                                                               | <b>20.22<sup>a</sup>, 1.84<sup>b</sup></b> |
| 1, 8-H(s)-(R, L) | R77 | $\text{CH}_3\text{CH}_2\text{CH}_2\text{CH}_2\text{C}(=\text{O})\text{OCH}_2(\text{OO}\cdot) \rightarrow \text{CH}_3\text{C}\cdot\text{H}_2\text{CH}_2\text{CH}_2\text{C}(=\text{O})\text{OCH}_2(\text{OOH})$ | 17.3                                       |
|                  |     |                                                                                                                                                                                                               | <b>17.3<sup>a</sup>, 0.00<sup>b</sup></b>  |
| 1, 9-H(p)-(R, L) | R78 | $\text{CH}_3\text{CH}_2\text{CH}_2\text{CH}_2\text{C}(=\text{O})\text{OCH}_2(\text{OO}\cdot) \rightarrow \text{C}\cdot\text{H}_2\text{CH}_2\text{CH}_2\text{CH}_2\text{C}(=\text{O})\text{OCH}_2(\text{OOH})$ | 23.04                                      |
|                  |     |                                                                                                                                                                                                               | <b>23.04<sup>a</sup>, 0.00<sup>b</sup></b> |

<sup>a</sup> The average energy barrier of reactions in each class.

<sup>b</sup> The maximum deviation of energy barriers in each class.

## 7. High-pressure-limit rate constants of studied reactions

**Table S6.** Calculated high-pressure-limit rate constants, rate rules, ratios of rate constants of reactions to the average values of the reactions and uncertainty factor values of the rate rule in subclasses of (L, L).

| Reaction                | Modified Arrhenius parameters |             |                    | T=800K                      |                                       |
|-------------------------|-------------------------------|-------------|--------------------|-----------------------------|---------------------------------------|
|                         | Log A (s <sup>-1</sup> )      | <i>n</i>    | <i>E</i> (cal/mol) | <i>k</i> (s <sup>-1</sup> ) | <i>k/k<sub>ave</sub></i> <sup>e</sup> |
| R1                      | -20.49                        | 9.73        | 17959.1            | 9.44E+02                    | 0.63                                  |
| R2                      | -15.76                        | 8.34        | 20640              | 8.77E+02                    | 0.63                                  |
| R3                      | -13.77                        | 7.63        | 20844.4            | 6.24E+02                    | 0.46                                  |
| R4                      | -14.64                        | 8.03        | 19729.4            | 2.57E+03                    | 2.38                                  |
| R5                      | -15.50                        | 8.18        | 21266              | 3.76E+02                    | 0.35                                  |
| R6                      | -17.27                        | 8.79        | 20707.2            | 6.11E+02                    | 0.56                                  |
| R7                      | -12.07                        | 7.44        | 21817.7            | 2.16E+03                    | 2.00                                  |
| <b>1, 4-H(p)-(L, L)</b> | <b>-16.21</b>                 | <b>8.46</b> | <b>19809.34</b>    | <b>1.08E+03</b>             | <b>6.83<sup>#</sup></b>               |
| R8                      | -27.30                        | 11.61       | 10441.8            | 3.58E+03                    | 0.49                                  |
| R9                      | -13.09                        | 7.5         | 18297.1            | 4.88E+03                    | 0.67                                  |
| R10                     | -13.83                        | 7.46        | 18027.8            | 6.87E+03                    | 0.95                                  |
| R11                     | -28.31                        | 12.04       | 10516.5            | 5.78E+03                    | 0.80                                  |
| R12                     | -28.60                        | 11.89       | 10507.4            | 3.16E+03                    | 0.43                                  |
| R13                     | -12.52                        | 7.21        | 18653.1            | 2.14E+03                    | 0.29                                  |
| R14                     | -9.28                         | 6.45        | 19190.2            | 2.10E+03                    | 0.29                                  |
| R15                     | -12.11                        | 7.23        | 17362              | 1.63E+04                    | 2.25                                  |

|                         |               |              |                 |                 |                         |
|-------------------------|---------------|--------------|-----------------|-----------------|-------------------------|
| R16                     | -11.64        | 7.22         | 16682.8         | 1.33E+04        | 1.83                    |
| R17                     | -26.31        | 11.35        | 10465.1         | 1.58E+04        | 2.17                    |
| R18                     | -27.30        | 11.61        | 10441.8         | 5.98E+03        | 0.82                    |
| <b>1, 4-H(s)-(L, L)</b> | <b>-20.64</b> | <b>9.70</b>  | <b>13638.46</b> | <b>7.26E+03</b> | <b>7.78<sup>#</sup></b> |
| R19                     | -25.41        | 11.12        | 9668.72         | 1.69E+04        | 0.41                    |
| R20                     | -10.60        | 6.82         | 16730.6         | 4.34E+04        | 1.04                    |
| R21                     | -24.09        | 10.67        | 10161.1         | 1.32E+04        | 0.32                    |
| R22                     | -24.12        | 10.96        | 9401.16         | 1.13E+05        | 2.76                    |
| R23                     | -13.77        | 7.79         | 16681           | 1.91E+04        | 0.46                    |
| <b>1, 4-H(t)-(L, L)</b> | <b>-25.36</b> | <b>11.18</b> | <b>9557.70</b>  | <b>4.11E+04</b> | <b>8.58<sup>#</sup></b> |
| R24                     | 0.94          | 3.29         | 17930.7         | 3.79E+05        | 0.81                    |
| R25                     | 1.03          | 3.36         | 18586.4         | 4.90E+05        | 1.05                    |
| R26                     | 2.14          | 2.82         | 18786.6         | 1.52E+05        | 0.33                    |
| R27                     | 0.45          | 3.38         | 18235.1         | 1.95E+05        | 0.42                    |
| R28                     | 4.97          | 2.41         | 18130           | 1.34E+06        | 2.88                    |
| R29                     | 3.40          | 2.53         | 18809           | 3.99E+05        | 0.85                    |
| R30                     | 4.51          | 2.24         | 20235.6         | 3.07E+05        | 0.66                    |
| <b>1, 5-H(p)-(L, L)</b> | <b>1.44</b>   | <b>3.13</b>  | <b>17855.64</b> | <b>4.67E+05</b> | <b>8.83<sup>#</sup></b> |
| R31                     | -0.98         | 3.68         | 12144.3         | 2.40E+06        | <b>0.59</b>             |
| R32                     | 2.54          | 2.79         | 16362.6         | 1.59E+06        | 0.39                    |
| R33                     | 2.80          | 2.72         | 15556.9         | 2.84E+05        | 0.70                    |
| R34                     | -4.49         | 4.76         | 10226.2         | 3.45E+06        | 0.84                    |
| R35                     | 1.09          | 3.37         | 14624.2         | 7.61E+06        | 1.86                    |
| R36                     | -0.77         | 3.77         | 12254.8         | 6.65E+06        | 1.63                    |
| <b>1, 5-H(s)-(L, L)</b> | <b>-3.39</b>  | <b>4.54</b>  | <b>11669.09</b> | <b>4.09E+06</b> | <b>4.79<sup>#</sup></b> |
| R37                     | -2.75         | 4.29         | 9232.1          | 1.59E+07        | 1.00                    |
| <b>1, 5-H(t)-(L, L)</b> | <b>-2.75</b>  | <b>4.29</b>  | <b>9232.1</b>   | <b>1.77E+07</b> | <b>1.00<sup>#</sup></b> |
| R38                     | -0.77         | 3.57         | 16189.3         | 1.45E+05        | 0.87                    |
| R39                     | 4.84          | 1.91         | 19781           | 9.74E+04        | 0.58                    |
| R40                     | 3.04          | 2.55         | 18403.9         | 2.57E+05        | 1.54                    |
| <b>1, 6-H(p)-(L, L)</b> | <b>1.09</b>   | <b>3.06</b>  | <b>17433.73</b> | <b>1.67E+05</b> | <b>2.64<sup>#</sup></b> |
| R41                     | -5.05         | 4.55         | 11710.2         | 9.33E+04        | 1                       |
| <b>1, 6-H(s)-(L, L)</b> | <b>-5.05</b>  | <b>4.55</b>  | <b>11710.2</b>  | <b>1.03E+05</b> | <b>1<sup>#</sup></b>    |

<sup>e</sup>  $k_{ave}$  is the average rate constants at 800 K for each reaction class.

<sup>#</sup> The uncertainty factor values of the high-pressure-limit rule at 800 K for each class in this work (The ratios of the largest rate constant to the smallest rate constant at 800 K in each class).

**Table S7.** Calculated high-pressure-limit rate constants, rate rules, ratios of rate constants of reactions to the average values of the reactions and uncertainty factor values of the rate rule in subclasses of (L, R).

| Reaction                | Modified Arrhenius parameters |             |                 | T=800K              |                                 |
|-------------------------|-------------------------------|-------------|-----------------|---------------------|---------------------------------|
|                         | Log A (s <sup>-1</sup> )      | n           | E (cal/mol)     | k(s <sup>-1</sup> ) | k/k <sub>ave</sub> <sup>e</sup> |
| R42                     | -11.90                        | 7           | 17304.2         | 5.08E+03            | 1.20                            |
| R43                     | -9.80                         | 6.42        | 19061.3         | 4.30E+03            | 1.02                            |
| R44                     | -12.26                        | 7.11        | 17866.6         | 3.22E+03            | 0.76                            |
| R45                     | -12.63                        | 7.28        | 17291.5         | 6.07E+03            | 1.44                            |
| R46                     | -11.83                        | 7.11        | 18816.6         | 4.70E+03            | 1.11                            |
| R47                     | -12.11                        | 7.08        | 18804.2         | 1.99E+03            | 0.47                            |
| <b>1, 6-H(p)-(L, R)</b> | <b>-12.63</b>                 | <b>7.26</b> | <b>17647.34</b> | <b>4.23E+03</b>     | <b>3.05<sup>#</sup></b>         |
| R48                     | -11.42                        | 6.68        | 18724.8         | 7.33E+02            | 0.57                            |
| R49                     | -11.92                        | 6.97        | 17971.4         | 2.47E+03            | 1.93                            |
| R50                     | -11.23                        | 6.47        | 18114.3         | 3.92E+02            | 0.31                            |
| R51                     | -11.67                        | 6.78        | 18041.8         | 1.25E+03            | 0.98                            |
| R52                     | -10.17                        | 6.27        | 17776.3         | 1.54E+03            | 1.20                            |
| R53                     | -9.38                         | 6.19        | 17895.5         | 2.04E+03            | 1.59                            |
| R54                     | -13.15                        | 7.23        | 18724.9         | 5.22E+02            | 0.41                            |
| <b>1, 7-H(p)-(L, R)</b> | <b>-12.33</b>                 | <b>6.96</b> | <b>17542.68</b> | <b>1.28E+03</b>     | <b>6.30<sup>#</sup></b>         |
| R55                     | -3.23                         | 3.97        | 16663.7         | 5.35E+03            | 0.59                            |
| R56                     | -4.52                         | 4.35        | 15812.8         | 6.35E+03            | 0.69                            |
| R57                     | -1.94                         | 3.64        | 16264.3         | 1.55E+04            | 1.70                            |
| R58                     | -4.66                         | 4.5         | 16221.1         | 9.33E+03            | 1.02                            |
| <b>1, 8-H(p)-(L, R)</b> | <b>-3.65</b>                  | <b>4.14</b> | <b>16076.59</b> | <b>9.14E+03</b>     | <b>2.90<sup>#</sup></b>         |

<sup>e</sup>  $k_{ave}$  is the average rate constants at 800 K for each reaction class.

<sup>#</sup> The uncertainty factor values of the high-pressure-limit rule at 800 K for each class in this work (The ratios of the largest rate constant to the smallest rate constant at 800 K in each class).

**Table S8.** Calculated high-pressure-limit rate constants, rate rules, ratios of rate constants of reactions to the average values of the reactions and uncertainty factor values of the rate rule in subclasses of (R, L).

|  | Modified Arrhenius parameters |   |             | T=800K              |                                 |
|--|-------------------------------|---|-------------|---------------------|---------------------------------|
|  | Log A (s <sup>-1</sup> )      | n | E (cal/mol) | k(s <sup>-1</sup> ) | k/k <sub>ave</sub> <sup>e</sup> |

| Reaction                | Log A (s <sup>-1</sup> ) | <i>n</i>    | <i>E</i> (cal/mol) | <i>k</i> (s <sup>-1</sup> ) | <i>k</i> / <i>k</i> <sub>ave</sub> <sup>e</sup> |
|-------------------------|--------------------------|-------------|--------------------|-----------------------------|-------------------------------------------------|
| R59                     | -5.56                    | 5.11        | 21347.7            | 2.71E+03                    | 1                                               |
| <b>1, 6-H(p)-(R, L)</b> | <b>-5.56</b>             | <b>5.11</b> | <b>21347.7</b>     | <b>2.71E+03</b>             | 1                                               |
| R60                     | -7.96                    | 5.75        | 16197.9            | 6.52E+04                    | 0.48                                            |
| R61                     | -8.05                    | 5.99        | 15496.9            | 1.25E+05                    | 0.92                                            |
| R62                     | -6.98                    | 5.76        | 15796.7            | 2.58E+05                    | 1.90                                            |
| R63                     | -7.31                    | 5.68        | 15395.8            | 9.39E+04                    | 0.69                                            |
| <b>1, 6-H(s)-(R, L)</b> | <b>-7.49</b>             | <b>5.82</b> | <b>15654.47</b>    | <b>1.36E+05</b>             | <b>3.96<sup>#</sup></b>                         |
| R64                     | -7.70                    | 5.87        | 12845.4            | 6.88E+05                    | 0.57                                            |
| R65                     | -6.63                    | 5.65        | 12957.3            | 1.73E+06                    | 1.43                                            |
| <b>1, 6-H(t)-(R, L)</b> | <b>-6.99</b>             | <b>5.72</b> | <b>12920.73</b>    | <b>1.21E+06</b>             | <b>2.5<sup>#</sup></b>                          |
| R66                     | -0.45                    | 3.3         | 19570              | 1.66E+04                    | 0.30                                            |
| R67                     | 0.72                     | 3.18        | 19041.5            | 5.73E+04                    | 1.03                                            |
| R68                     | 2.30                     | 2.65        | 19042.3            | 6.15E+04                    | 1.11                                            |
| R69                     | 1.42                     | 2.95        | 18492.7            | 8.68E+04                    | 1.56                                            |
| <b>1, 7-H(p)-(R, L)</b> | <b>0.91</b>              | <b>3.08</b> | <b>18655.06</b>    | <b>5.56E+04</b>             | <b>5.22<sup>#</sup></b>                         |
| R70                     | 1.08                     | 3.07        | 16511.6            | 3.34E+05                    | 1.13                                            |
| R71                     | 2.07                     | 2.7         | 16071.3            | 3.33E+05                    | 1.13                                            |
| R72                     | -4.14                    | 4.52        | 13577.8            | 2.20E+05                    | 0.74                                            |
| <b>1, 7-H(s)-(R, L)</b> | <b>-0.79</b>             | <b>3.57</b> | <b>15157.98</b>    | <b>2.96E+05</b>             | <b>1.52<sup>#</sup></b>                         |
| R73                     | -0.84                    | 3.59        | 12313.3            | 1.80E+06                    | 1.00                                            |
| <b>1, 7-H(t)-(R, L)</b> | <b>-0.84</b>             | <b>3.59</b> | <b>12313.3</b>     | 1.80E+06                    | <b>1.00<sup>#</sup></b>                         |
| R74                     | 4.01                     | 2.03        | 16607.5            | 2.40E+05                    | 0.56                                            |
| R75                     | 6.12                     | 1.45        | 16254.8            | 7.67E+05                    | 1.78                                            |
| R76                     | 5.55                     | 1.6         | 17377.9            | 2.88E+05                    | 0.67                                            |
| <b>1, 8-H(p)-(R, L)</b> | <b>4.91</b>              | <b>1.78</b> | <b>16253.18</b>    | <b>4.32E+05</b>             | <b>3.19<sup>#</sup></b>                         |
| R77                     | 5.90                     | 1.5         | 14264.9            | 2.34E+06                    | 1.00                                            |
| <b>1, 8-H(s)-(R, L)</b> | 5.90                     | 1.5         | 14264.9            | 2.34E+06                    | <b>1.00<sup>#</sup></b>                         |
| R78                     | 2.41                     | 2.43        | 17819.2            | 3.91E+04                    | 1.00                                            |
| <b>1, 9-H(p)-(R, L)</b> | <b>2.41</b>              | <b>2.43</b> | <b>17819.2</b>     | <b>3.91E+04</b>             | <b>1.00<sup>#</sup></b>                         |

<sup>e</sup> *k*<sub>ave</sub> is the average rate constants at 800 K for each reaction class.

<sup>#</sup> The uncertainty factor values of the high-pressure-limit rule at 800 K for each class in this work (The ratios of the largest rate constant to the smallest rate constant at 800 K in each class).

## 8. Pressure-dependent rate constants of studied reactions

**Table S9.** Calculated pressure-dependent rate constants, rate rules, ratios of rate constants of reactions to the average values of the reactions and uncertainty factor values of the rate rule in subclasses of (L, L) at different pressures.

| Reaction | Pressure (atm) | Modified Arrhenius parameters |          |                    | T=800K                      |                                       |
|----------|----------------|-------------------------------|----------|--------------------|-----------------------------|---------------------------------------|
|          |                | Log A (s <sup>-1</sup> )      | <i>n</i> | <i>E</i> (cal/mol) | <i>k</i> (s <sup>-1</sup> ) | <i>k/k<sub>ave</sub></i> <sup>e</sup> |
| R1       | 0.01           | -1.00                         | 3.51     | 23788.9            | 8.35E+02                    | 0.46                                  |
|          | 0.1            | -5.94                         | 5.10     | 22366              | 9.04E+02                    | 0.50                                  |
|          | 1.0            | -13.68                        | 7.57     | 20078.9            | 9.54E+02                    | 0.74                                  |
|          | 10             | -18.50                        | 9.10     | 18600.8            | 9.62E+02                    | 0.63                                  |
|          | 100            | -20.18                        | 9.63     | 18072.6            | 9.63E+02                    | 0.58                                  |
| R2       | 0.01           | 6.60                          | 1.11     | 9363.28            | 8.27E+02                    | 0.50                                  |
|          | 0.1            | 1.91                          | 2.61     | 7982.33            | 8.65E+02                    | 0.52                                  |
|          | 1.0            | -5.48                         | 4.97     | 5767.52            | 8.90E+02                    | 0.69                                  |
|          | 10             | -9.74                         | 6.31     | 4450.62            | 8.93E+02                    | 0.63                                  |
|          | 100            | -11.06                        | 6.73     | 4034.68            | 8.93E+02                    | 0.57                                  |
| R3       | 0.01           | -0.59                         | 3.47     | 24907.5            | 6.49E+02                    | 0.43                                  |
|          | 0.1            | -4.13                         | 4.59     | 23844.1            | 6.60E+02                    | 0.43                                  |
|          | 1.0            | -10.14                        | 6.50     | 22011.5            | 6.67E+02                    | 0.52                                  |
|          | 10             | -13.03                        | 7.41     | 21109.5            | 6.67E+02                    | 0.48                                  |
|          | 100            | -13.69                        | 7.62     | 20899.9            | 6.68E+02                    | 0.44                                  |
| R4       | 0.01           | 4.56                          | 1.93     | 25545.6            | 2.43E+03                    | 2.27                                  |
|          | 0.1            | -0.30                         | 3.49     | 24115.6            | 2.54E+03                    | 2.24                                  |
|          | 1.0            | -8.11                         | 5.98     | 21780.6            | 2.62E+03                    | 2.04                                  |
|          | 10             | -12.83                        | 7.47     | 20324.9            | 2.63E+03                    | 2.39                                  |
|          | 100            | -14.37                        | 7.96     | 19840.7            | 2.63E+03                    | 2.18                                  |
| R5       | 0.01           | -1.40                         | 3.72     | 25573.1            | 3.99E+02                    | 0.37                                  |
|          | 0.1            | -5.27                         | 4.96     | 24420.8            | 4.09E+02                    | 0.36                                  |
|          | 1.0            | -11.53                        | 6.95     | 22519.7            | 4.15E+02                    | 0.32                                  |
|          | 10             | -14.63                        | 7.93     | 21554.2            | 4.16E+02                    | 0.38                                  |
|          | 100            | -15.39                        | 8.16     | 21316.7            | 4.16E+02                    | 0.35                                  |
| R6       | 0.01           | -1.49                         | 3.81     | 25543.6            | 6.09E+02                    | 0.57                                  |
|          | 0.1            | -5.59                         | 5.11     | 24319.7            | 6.23E+02                    | 0.55                                  |

|                         |             |               |             |                 |                 |                         |
|-------------------------|-------------|---------------|-------------|-----------------|-----------------|-------------------------|
|                         | 1.0         | -12.53        | 7.32        | 22216           | 6.33E+02        | 0.49                    |
|                         | 10          | -16.32        | 8.52        | 21037           | 6.34E+02        | 0.58                    |
|                         | 100         | -17.37        | 8.85        | 20705.1         | 6.35E+02        | 0.53                    |
| R7                      | 0.01        | 8.83          | 0.70        | 28048.3         | 2.57E+03        | 2.40                    |
|                         | 0.1         | 3.67          | 2.35        | 26539.9         | 2.72E+03        | 2.40                    |
|                         | 1.0         | -4.58         | 4.99        | 24087.1         | 2.83E+03        | 2.20                    |
|                         | 10          | -9.90         | 6.67        | 22454           | 2.11E+03        | 1.92                    |
|                         | 100         | -11.84        | 7.29        | 21844.3         | 2.85E+03        | 2.36                    |
| <b>1, 4-H(p)-(L, L)</b> | <b>0.01</b> | <b>1.85</b>   | <b>2.74</b> | <b>25286.01</b> | <b>1.07E+03</b> | <b>6.46<sup>#</sup></b> |
|                         | <b>0.1</b>  | <b>-2.61</b>  | <b>4.17</b> | <b>23983.03</b> | <b>1.13E+03</b> | <b>6.65<sup>#</sup></b> |
|                         | <b>1.0</b>  | <b>-9.81</b>  | <b>6.46</b> | <b>21850.28</b> | <b>1.29E+03</b> | <b>6.81<sup>#</sup></b> |
|                         | <b>10</b>   | <b>-13.29</b> | <b>7.56</b> | <b>20714.24</b> | <b>1.10E+03</b> | <b>6.32<sup>#</sup></b> |
|                         | <b>100</b>  | <b>-15.73</b> | <b>8.33</b> | <b>20019.77</b> | <b>1.21E+03</b> | <b>6.84<sup>#</sup></b> |
| R8                      | 0.01        | -6.63         | 5.01        | 16586.1         | 2.42E+03        | 0.44                    |
|                         | 0.1         | -12.17        | 6.79        | 15003.2         | 2.84E+03        | 0.46                    |
|                         | 1.0         | -20.14        | 9.35        | 12672.2         | 3.39E+03        | 0.47                    |
|                         | 10          | -25.17        | 10.94       | 11138.2         | 3.59E+03        | 0.48                    |
|                         | 100         | -26.96        | 11.51       | 10581.1         | 3.62E+03        | 0.48                    |
| R9                      | 0.01        | 6.79          | 1.16        | 24239.1         | 3.36E+03        | 0.61                    |
|                         | 0.1         | 1.51          | 2.85        | 22715.1         | 3.85E+03        | 0.62                    |
|                         | 1.0         | -6.38         | 5.38        | 20391.7         | 4.53E+03        | 0.64                    |
|                         | 10          | -11.22        | 6.91        | 18910.7         | 4.77E+03        | 0.64                    |
|                         | 100         | -12.83        | 7.42        | 18407.6         | 4.80E+03        | 0.64                    |
| R10                     | 0.01        | 5.72          | 1.50        | 23689.8         | 6.05E+03        | 1.10                    |
|                         | 0.1         | 0.85          | 3.05        | 22264.5         | 6.37E+03        | 1.03                    |
|                         | 1.0         | -6.81         | 5.50        | 19986.9         | 6.63E+03        | 0.93                    |
|                         | 10          | -11.34        | 6.94        | 18593.4         | 6.66E+03        | 0.89                    |
|                         | 100         | -12.75        | 7.38        | 18151.9         | 6.66E+03        | 0.88                    |
| R11                     | 0.01        | -3.91         | 4.26        | 1776            | 3.99E+03        | 0.73                    |
|                         | 0.1         | -9.92         | 6.19        | 16043.7         | 4.74E+03        | 0.77                    |
|                         | 1.0         | -18.69        | 9.01        | 13494.4         | 5.84E+03        | 0.82                    |
|                         | 10          | -24.90        | 10.98       | 11612.5         | 6.31E+03        | 0.84                    |
|                         | 100         | -27.58        | 11.83       | 10775.3         | 6.40E+03        | 0.85                    |

|     |      |        |       |         |          |      |
|-----|------|--------|-------|---------|----------|------|
| R12 | 0.01 | 3.23   | 2.23  | 23011.1 | 2.64E+03 | 0.48 |
|     | 0.1  | -0.96  | 3.57  | 21771.9 | 2.86E+03 | 0.46 |
|     | 1.0  | -8.02  | 5.82  | 19657   | 3.20E+03 | 0.45 |
|     | 10   | -11.92 | 7.05  | 18452.7 | 3.30E+03 | 0.44 |
|     | 100  | -12.99 | 7.39  | 18116.6 | 3.31E+03 | 0.44 |
| R13 | 0.01 | -13.87 | 7.25  | 14948.2 | 2.04E+03 | 0.37 |
|     | 0.1  | -17.76 | 8.49  | 13787.3 | 2.09E+03 | 0.34 |
|     | 1.0  | -24.26 | 10.56 | 11819.8 | 2.12E+03 | 0.30 |
|     | 10   | -27.55 | 11.60 | 10797.9 | 2.13E+03 | 0.28 |
|     | 100  | -28.35 | 11.85 | 10544.9 | 2.13E+03 | 0.28 |
| R14 | 0.01 | 1.30   | 2.82  | 22872.8 | 1.69E+03 | 0.31 |
|     | 0.1  | -2.46  | 4.02  | 21753.6 | 1.81E+03 | 0.29 |
|     | 1.0  | -8.72  | 5.01  | 19860.4 | 1.97E+03 | 0.28 |
|     | 10   | -11.75 | 6.96  | 18919.6 | 2.00E+03 | 0.27 |
|     | 100  | -12.43 | 7.18  | 18702.7 | 2.01E+03 | 0.27 |
| R15 | 0.01 | 14.96  | -1.30 | 26302.3 | 9.83E+03 | 1.79 |
|     | 0.1  | 8.80   | 0.69  | 24566.4 | 1.20E+04 | 1.95 |
|     | 1.0  | 0.13   | 3.48  | 22084.4 | 1.53E+04 | 2.15 |
|     | 10   | -6.05  | 5.44  | 20222.2 | 1.68E+04 | 2.24 |
|     | 100  | -8.68  | 6.27  | 19407.8 | 1.70E+04 | 2.26 |
| R16 | 0.01 | 9.57   | 0.32  | 23788   | 9.61E+04 | 1.75 |
|     | 0.1  | 3.98   | 2.11  | 22178.1 | 1.11E+04 | 1.80 |
|     | 1.0  | -4.31  | 4.77  | 19761.9 | 1.35E+04 | 1.89 |
|     | 10   | -9.74  | 6.49  | 18111.3 | 1.44E+04 | 1.92 |
|     | 100  | -11.71 | 7.11  | 17495   | 1.45E+04 | 1.93 |
| R17 | 0.01 | 7.28   | 0.98  | 22595.1 | 1.41E+04 | 2.57 |
|     | 0.1  | 2.09   | 2.64  | 21091.9 | 1.51E+04 | 2.45 |
|     | 1.0  | -5.83  | 5.17  | 18768.5 | 1.60E+04 | 2.25 |
|     | 10   | -10.71 | 6.73  | 17276.4 | 1.62E+04 | 2.16 |
|     | 100  | -12.31 | 7.23  | 16777.7 | 1.62E+04 | 2.15 |
| R18 | 0.01 | -6.14  | 4.93  | 16526.1 | 4.55E+03 | 0.83 |
|     | 0.1  | -11.26 | 6.57  | 15030.5 | 5.11E+03 | 0.83 |
|     | 1.0  | -19.29 | 9.13  | 12658.2 | 5.97E+03 | 0.84 |

|                         |             |               |             |                 |                 |                         |
|-------------------------|-------------|---------------|-------------|-----------------|-----------------|-------------------------|
|                         | 10          | -24.30        | 10.72       | 11122.2         | 6.26E+03        | 0.84                    |
|                         | 100         | -26.00        | 11.26       | 10588.4         | 6.31E+03        | 0.84                    |
| <b>1, 4-H(s)-(L, L)</b> | <b>0.01</b> | <b>0.14</b>   | <b>3.08</b> | <b>19838.30</b> | <b>5.48E+03</b> | <b>8.31<sup>#</sup></b> |
|                         | <b>0.1</b>  | <b>-5.09</b>  | <b>4.76</b> | <b>18328.45</b> | <b>6.18E+03</b> | <b>8.36<sup>#</sup></b> |
|                         | <b>1.0</b>  | <b>-13.13</b> | <b>7.33</b> | <b>15967.11</b> | <b>7.14E+03</b> | <b>8.16<sup>#</sup></b> |
|                         | <b>10</b>   | <b>-18.32</b> | <b>8.98</b> | <b>14379.71</b> | <b>7.49E+03</b> | <b>8.36<sup>#</sup></b> |
|                         | <b>100</b>  | <b>-20.24</b> | <b>9.58</b> | <b>13778.77</b> | <b>7.55E+03</b> | <b>8.49<sup>#</sup></b> |
| R19                     | 0.01        | -1.90         | 3.59        | 16571.7         | 9.90E+03        | 0.38                    |
|                         | 0.1         | -7.95         | 5.54        | 14858.8         | 1.19E+04        | 0.38                    |
|                         | 1.0         | -16.46        | 8.28        | 12409.4         | 1.50E+04        | 0.38                    |
|                         | 10          | -22.39        | 10.16       | 10617.7         | 1.62E+04        | 0.38                    |
|                         | 100         | -24.82        | 10.93       | 982.97          | 1.65E+04        | 0.39                    |
| R20                     | 0.01        | 13.54         | -0.92       | 23774.5         | 2.35E+04        | 0.90                    |
|                         | 0.1         | 7.33          | 1.08        | 22018.1         | 2.86E+04        | 0.90                    |
|                         | 1.0         | -1.30         | 3.86        | 19558.2         | 3.67E+04        | 0.92                    |
|                         | 10          | -7.47         | 5.83        | 17703.8         | 4.03E+04        | 0.95                    |
|                         | 100         | -10.03        | 6.63        | 16909.9         | 4.10E+04        | 0.96                    |
| R21                     | 0.01        | -3.29         | 4.05        | 16339.2         | 9.86E+03        | 0.38                    |
|                         | 0.1         | -8.71         | 5.79        | 14770.7         | 1.13E+04        | 0.36                    |
|                         | 1.0         | -16.82        | 8.38        | 12401           | 1.35E+04        | 0.34                    |
|                         | 10          | -21.97        | 10.02       | 10829.8         | 1.44E+04        | 0.34                    |
|                         | 100         | -23.75        | 10.58       | 10274.2         | 1.45E+04        | 0.34                    |
| R22                     | 0.01        | 4.74          | 1.61        | 17746.9         | 7.54E+04        | 2.90                    |
|                         | 0.1         | -2.44         | 3.94        | 15768.8         | 9.41E+04        | 2.96                    |
|                         | 1.0         | -11.69        | 6.94        | 13221.8         | 1.17E+05        | 2.95                    |
|                         | 10          | -19.56        | 9.46        | 10906.3         | 1.23E+05        | 2.90                    |
|                         | 100         | -24.12        | 10.90       | 9507.9          | 1.24E+05        | 2.89                    |
| R23                     | 0.01        | 9.56          | 0.32        | 23559           | 1.12E+04        | 0.43                    |
|                         | 0.1         | 3.63          | 2.23        | 21863.1         | 1.33E+04        | 0.42                    |
|                         | 1.0         | -4.98         | 4.99        | 19376.5         | 1.65E+04        | 0.41                    |
|                         | 10          | -10.92        | 6.88        | 17577           | 1.78E+04        | 0.42                    |
|                         | 100         | -13.29        | 7.63        | 16839.6         | 1.81E+04        | 0.42                    |
| <b>1, 4-H(t)-(L, L)</b> | <b>0.01</b> | <b>-1.36</b>  | <b>3.46</b> | <b>16339.46</b> | <b>2.60E+04</b> | <b>7.65<sup>#</sup></b> |



|     |            |               |              |                 |                 |                         |
|-----|------------|---------------|--------------|-----------------|-----------------|-------------------------|
|     | <b>0.1</b> | <b>-7.06</b>  | <b>5.31</b>  | <b>14798.64</b> | <b>3.18E+04</b> | <b>8.32<sup>#</sup></b> |
|     | <b>1.0</b> | <b>-15.25</b> | <b>7.97</b>  | <b>12549.22</b> | <b>3.98E+04</b> | <b>8.65<sup>#</sup></b> |
|     | <b>10</b>  | <b>-21.37</b> | <b>9.92</b>  | <b>10774.54</b> | <b>4.23E+04</b> | <b>8.56<sup>#</sup></b> |
|     | <b>100</b> | <b>-24.38</b> | <b>10.88</b> | <b>9864.83</b>  | <b>4.28E+04</b> | <b>8.54<sup>#</sup></b> |
| R24 | 0.01       | 25.51         | -4.66        | 24805.7         | 1.59E+05        | <b>0.75</b>             |
|     | 0.1        | 18.87         | -2.49        | 23039.6         | 2.19E+05        | <b>0.75</b>             |
|     | 1.0        | 10.99         | 0.08         | 20936.9         | 3.80E+05        | <b>0.81</b>             |
|     | 10         | 4.65          | 2.11         | 19089.5         | 3.66E+05        | <b>0.75</b>             |
|     | 100        | 1.70          | 3.05         | 18185.7         | 3.78E+05        | <b>0.76</b>             |
| R25 | 0.01       | 28.18         | -5.45        | 26084           | 1.76E+05        | 0.83                    |
|     | 0.1        | 21.26         | -3.17        | 24283.2         | 2.57E+05        | 0.88                    |
|     | 1.0        | 13.23         | -0.54        | 22196.1         | 4.82E+05        | 1.03                    |
|     | 10         | 6.16          | 1.73         | 20161.6         | 4.72E+05        | 0.97                    |
|     | 100        | 2.27          | 2.97         | 18978.9         | 4.96E+05        | 1.00                    |
| R26 | 0.01       | 21.97         | -3.55        | 24556           | 9.23E+04        | 0.44                    |
|     | 0.1        | 16.35         | -1.73        | 22974           | 1.11E+05        | 0.38                    |
|     | 1.0        | 8.82          | 0.70         | 20844.4         | 1.59E+05        | 0.34                    |
|     | 10         | 4.01          | 2.23         | 19400.9         | 1.51E+05        | 0.31                    |
|     | 100        | 2.44          | 2.72         | 18915.5         | 1.53E+05        | 0.31                    |
| R27 | 0.01       | 22.40         | -3.68        | 24525.7         | 1.07E+05        | 0.51                    |
|     | 0.1        | 16.36         | -1.72        | 22845.2         | 1.33E+05        | 0.45                    |
|     | 1.0        | 8.51          | 0.82         | 20655           | 2.08E+05        | 0.44                    |
|     | 10         | 2.99          | 2.58         | 19012.6         | 1.92E+05        | 0.40                    |
|     | 100        | 0.89          | 3.24         | 18363.6         | 1.96E+05        | 0.39                    |
| R28 | 0.01       | 30.27         | -6.11        | 25163.9         | 6.06E+05        | 2.87                    |
|     | 0.1        | 23.31         | -3.81        | 23378.6         | 8.88E+05        | 3.03                    |

|                         |             |              |              |                 |                 |                          |
|-------------------------|-------------|--------------|--------------|-----------------|-----------------|--------------------------|
|                         | 1.0         | 15.81        | -1.34        | 21504.2         | 1.35E+06        | 2.88                     |
|                         | 10          | 8.89         | 0.89         | 19541.8         | 1.52E+06        | 3.13                     |
|                         | 100         | 4.97         | 2.14         | 18358.7         | 1.54E+06        | 3.10                     |
| R29                     | 0.01        | 26.78        | -5.01        | 25443           | 1.92E+05        | 0.91                     |
|                         | 0.1         | 20.35        | -2.92        | 23692.1         | 2.52E+05        | 0.86                     |
|                         | 1.0         | 12.50        | -0.37        | 21567           | 4.05E+05        | 0.86                     |
|                         | 10          | 6.51         | 1.55         | 19806.4         | 3.98E+05        | 0.82                     |
|                         | 100         | 3.94         | 2.36         | 19019.2         | 4.08E+05        | 0.82                     |
| R30                     | 0.01        | 28.12        | -5.37        | 26944.9         | 1.48E+05        | 0.70                     |
|                         | 0.1         | 21.68        | -3.28        | 25179           | 1.92E+05        | 0.66                     |
|                         | 1.0         | 13.68        | -0.68        | 22991.9         | 3.02E+05        | 0.64                     |
|                         | 10          | 7.65         | 1.25         | 21212.9         | 2.98E+05        | 0.61                     |
|                         | 100         | 5.08         | 2.06         | 20424           | 3.05E+05        | 0.61                     |
| <b>1, 5-H(p)-(L, L)</b> | <b>0.01</b> | <b>24.83</b> | <b>-4.45</b> | <b>24223.22</b> | <b>2.11E+05</b> | <b>6.56<sup>#</sup></b>  |
|                         | <b>0.1</b>  | <b>18.80</b> | <b>-2.48</b> | <b>22665.91</b> | <b>2.93E+05</b> | <b>7.99<sup>#</sup></b>  |
|                         | <b>1.0</b>  | <b>12.11</b> | <b>-0.26</b> | <b>21021.82</b> | <b>4.70E+05</b> | <b>8.54<sup>#</sup></b>  |
|                         | <b>10</b>   | <b>5.38</b>  | <b>1.89</b>  | <b>19036.79</b> | <b>4.85E+05</b> | <b>10.03<sup>#</sup></b> |
|                         | <b>100</b>  | <b>2.40</b>  | <b>2.84</b>  | <b>18148.64</b> | <b>4.97E+05</b> | <b>10.07<sup>#</sup></b> |
| R31                     | 0.01        | 21.01        | -3.51        | 17972.6         | 8.22E+05        | <b>0.25</b>              |
|                         | 0.1         | 14.73        | -1.42        | 16428.1         | 1.27E+06        | 0.37                     |
|                         | 1.0         | 8.29         | 0.72         | 14870.6         | 2.06E+06        | 0.52                     |
|                         | 10          | 2.51         | 2.58         | 13241.8         | 2.43E+06        | 0.59                     |
|                         | 100         | -0.29        | 3.47         | 12399.3         | 2.53E+06        | 0.61                     |
| R32                     | 0.01        | 19.39        | -2.87        | 21448.1         | 6.87E+05        | 0.21                     |

|     |      |       |       |         |          |      |
|-----|------|-------|-------|---------|----------|------|
|     | 0.1  | 14.12 | -1.16 | 19972.7 | 9.90E+05 | 0.28 |
|     | 1.0  | 7.23  | 1.06  | 18032.8 | 1.47E+06 | 0.38 |
|     | 10   | 3.12  | 2.37  | 16801.8 | 1.63E+06 | 0.40 |
|     | 100  | 1.94  | 2.74  | 16440.1 | 1.65E+06 | 0.40 |
| R33 | 0.01 | 27.27 | -5.25 | 23078.6 | 8.34E+05 | 0.25 |
|     | 0.1  | 20.50 | -3.02 | 21337.4 | 1.32E+06 | 0.38 |
|     | 1.0  | 13.23 | -0.62 | 19509.5 | 2.19E+06 | 0.57 |
|     | 10   | 6.77  | 1.46  | 17670.2 | 2.75E+06 | 0.67 |
|     | 100  | 3.44  | 2.52  | 16661.4 | 2.91E+06 | 0.70 |
| R34 | 0.01 | 1.85  | 2.77  | 12240   | 3.38E+06 | 1.03 |
|     | 0.1  | 1.69  | 2.81  | 12193.4 | 3.38E+06 | 0.97 |
|     | 1.0  | 0.81  | 3.09  | 11917.9 | 3.40E+06 | 0.88 |
|     | 10   | -1.44 | 3.80  | 11214   | 3.44E+06 | 0.84 |
|     | 100  | -3.67 | 4.50  | 10513.6 | 3.46E+06 | 0.83 |
| R35 | 0.01 | 10.45 | 0.42  | 17555.2 | 7.58E+06 | 2.31 |
|     | 0.1  | 10.35 | 0.45  | 17525.8 | 7.59E+06 | 2.18 |
|     | 1.0  | 9.65  | 0.68  | 17310.2 | 7.64E+06 | 1.98 |
|     | 10   | 7.19  | 1.45  | 16552.8 | 7.79E+06 | 1.91 |
|     | 100  | 3.61  | 2.59  | 15437.4 | 7.96E+06 | 1.91 |
| R36 | 0.01 | 6.58  | 1.45  | 14555   | 6.36E+06 | 1.94 |
|     | 0.1  | 6.47  | 1.48  | 14521.1 | 6.36E+06 | 1.82 |
|     | 1.0  | 5.73  | 1.72  | 14292.8 | 6.40E+06 | 1.66 |
|     | 10   | 3.47  | 2.43  | 13591.6 | 6.48E+06 | 1.59 |
|     | 100  | 0.70  | 3.30  | 12721.3 | 6.55E+06 | 1.57 |

|                         |             |              |              |                 |                 |                          |
|-------------------------|-------------|--------------|--------------|-----------------|-----------------|--------------------------|
| <b>1, 5-H(s)-(L, L)</b> | <b>0.01</b> | <b>5.53</b>  | <b>1.68</b>  | <b>14282.86</b> | <b>3.28E+06</b> | <b>11.04<sup>#</sup></b> |
|                         | <b>0.1</b>  | <b>5.57</b>  | <b>1.68</b>  | <b>14340.96</b> | <b>3.49E+06</b> | <b>7.67<sup>#</sup></b>  |
|                         | <b>1.0</b>  | <b>4.52</b>  | <b>2.03</b>  | <b>14104.12</b> | <b>3.85E+06</b> | <b>5.18<sup>#</sup></b>  |
|                         | <b>10</b>   | <b>1.30</b>  | <b>3.06</b>  | <b>13150.25</b> | <b>4.09E+06</b> | <b>4.78<sup>#</sup></b>  |
|                         | <b>100</b>  | <b>-1.83</b> | <b>4.05</b>  | <b>12185.81</b> | <b>4.18E+06</b> | <b>4.82<sup>#</sup></b>  |
| R37                     | 0.01        | 19.15        | -3.02        | 14373.7         | 2.93E+06        | 1.00                     |
|                         | 0.1         | 13.73        | -1.15        | 13305.8         | 5.71E+06        | 1.00                     |
|                         | 1.0         | 9.00         | 0.50         | 12480.5         | 1.11E+07        | 1.00                     |
|                         | 10          | 3.05         | 2.46         | 10947.4         | 1.55E+07        | 1.00                     |
|                         | 100         | -1.14        | 3.80         | 9731.32         | 1.72E+07        | 1.00                     |
| <b>1, 5-H(t)-(L, L)</b> | <b>0.01</b> | <b>19.15</b> | <b>-3.02</b> | <b>14373.7</b>  | <b>2.93E+06</b> | <b>1.00<sup>#</sup></b>  |
|                         | <b>0.1</b>  | <b>13.73</b> | <b>-1.15</b> | <b>13305.8</b>  | <b>5.71E+06</b> | <b>1.00<sup>#</sup></b>  |
|                         | <b>1.0</b>  | <b>9.00</b>  | <b>0.50</b>  | <b>12480.5</b>  | <b>1.11E+07</b> | <b>1.00<sup>#</sup></b>  |
|                         | <b>10</b>   | <b>3.05</b>  | <b>2.46</b>  | <b>10947.4</b>  | <b>1.55E+07</b> | <b>1.00<sup>#</sup></b>  |
|                         | <b>100</b>  | <b>-1.14</b> | <b>3.80</b>  | <b>9731.32</b>  | <b>1.72E+07</b> | <b>1.00<sup>#</sup></b>  |
| R38                     | 0.01        | 16.87        | -2.08        | 21359           | 1.28E+05        | 0.94                     |
|                         | 0.1         | 11.73        | -0.43        | 19903.2         | 1.43E+05        | 0.92                     |
|                         | 1.0         | 4.71         | 1.83         | 17898.2         | 1.59E+05        | 0.90                     |
|                         | 10          | 0.58         | 3.15         | 16654.3         | 1.62E+05        | 0.89                     |
|                         | 100         | -0.60        | 3.52         | 16288.5         | 1.62E+05        | 0.89                     |
| R39                     | 0.01        | 21.98        | -3.55        | 24818.8         | 9.59E+04        | 0.70                     |
|                         | 0.1         | 17.01        | -1.95        | 23403.7         | 1.06E+05        | 0.68                     |
|                         | 1.0         | 10.05        | 0.29         | 21403.7         | 1.16E+05        | 0.65                     |
|                         | 10          | 6.11         | 1.54         | 20211.2         | 1.18E+05        | 0.65                     |

|                         |             |              |              |                 |                 |                         |
|-------------------------|-------------|--------------|--------------|-----------------|-----------------|-------------------------|
|                         | 100         | 5.04         | 1.88         | 19879.2         | 1.18E+05        | 0.65                    |
| R40                     | 0.01        | 23.70        | -4.10        | 24344.9         | 1.86E+05        | 1.36                    |
|                         | 0.1         | 17.84        | -2.20        | 22713.6         | 2.19E+05        | 1.40                    |
|                         | 1.0         | 10.29        | 0.24         | 20609.3         | 2.58E+05        | 1.45                    |
|                         | 10          | 5.18         | 1.87         | 19085.5         | 2.65E+05        | 1.46                    |
|                         | 100         | 3.37         | 2.45         | 18525.1         | 2.66E+05        | 1.46                    |
| <b>1, 6-H(p)-(L, L)</b> | <b>0.01</b> | <b>19.86</b> | <b>-2.96</b> | <b>22898.08</b> | <b>1.37E+05</b> | <b>1.94<sup>#</sup></b> |
|                         | <b>0.1</b>  | <b>14.54</b> | <b>-1.24</b> | <b>21404.62</b> | <b>1.56E+05</b> | <b>2.07<sup>#</sup></b> |
|                         | <b>1.0</b>  | <b>7.36</b>  | <b>1.08</b>  | <b>19374.23</b> | <b>1.78E+05</b> | <b>2.22<sup>#</sup></b> |
|                         | <b>10</b>   | <b>2.84</b>  | <b>2.52</b>  | <b>18022.79</b> | <b>1.82E+05</b> | <b>2.25<sup>#</sup></b> |
|                         | <b>100</b>  | <b>1.39</b>  | <b>2.98</b>  | <b>17575.93</b> | <b>1.82E+05</b> | <b>2.25<sup>#</sup></b> |
| R41                     | 0.01        | 6.13         | 0.99         | 15067.2         | 8.05E+04        | 1.00                    |
|                         | 0.1         | 2.71         | 2.09         | 14074.4         | 8.77E+04        | 1.00                    |
|                         | 1.0         | -2.46        | 3.75         | 12554.2         | 9.78E+04        | 1.00                    |
|                         | 10          | -4.63        | 4.44         | 11891.8         | 1.00E+05        | 1.00                    |
|                         | 100         | -5.03        | 4.56         | 11768.5         | 1.00E+05        | 1.00                    |
| <b>1, 6-H(s)-(L, L)</b> | <b>0.01</b> | <b>6.13</b>  | <b>0.99</b>  | <b>15067.2</b>  | <b>8.05E+04</b> | <b>1.00<sup>#</sup></b> |
|                         | <b>0.1</b>  | <b>2.71</b>  | <b>2.09</b>  | <b>14074.4</b>  | <b>8.77E+04</b> | <b>1.00<sup>#</sup></b> |
|                         | <b>1.0</b>  | <b>-2.46</b> | <b>3.75</b>  | <b>12554.2</b>  | <b>9.78E+04</b> | <b>1.00<sup>#</sup></b> |
|                         | <b>10</b>   | <b>-4.63</b> | <b>4.44</b>  | <b>11891.8</b>  | <b>1.00E+05</b> | <b>1.00<sup>#</sup></b> |
|                         | <b>100</b>  | <b>-5.03</b> | <b>4.56</b>  | <b>11768.5</b>  | <b>1.00E+05</b> | <b>1.00<sup>#</sup></b> |

<sup>e</sup>  $k_{ave}$  is the average rate constants of 800 K for each reaction class.

<sup>#</sup> The uncertainty factor values of the pressure-dependent rate rule at 800 K for each class at different pressures (The ratios of the largest rate constant to the smallest rate constant at 800 K in each class at different pressures).

**Table S10.** Calculated pressure-dependent rate constants, rate rules, ratios of rate constants of reactions to the average values of the reactions and uncertainty factor values of the rate rule in subclasses of (L, R) at different pressures.

| Reaction | Pressure (atm) | Modified Arrhenius parameters |      |             | T=800K               |                                 |
|----------|----------------|-------------------------------|------|-------------|----------------------|---------------------------------|
|          |                | Log A (s <sup>-1</sup> )      | n    | E (cal/mol) | k (s <sup>-1</sup> ) | k/k <sub>ave</sub> <sup>e</sup> |
| R42      | 0.01           | 7.28                          | 0.85 | 22910.4     | 4.75E+03             | 0.92                            |
|          | 0.1            | 1.77                          | 2.64 | 21378.9     | 5.55E+03             | 1.00                            |
|          | 1.0            | -5.71                         | 5.04 | 19221.6     | 6.16E+03             | 1.04                            |
|          | 10             | -10.23                        | 6.48 | 17852.4     | 6.27E+03             | 1.05                            |
|          | 100            | -11.69                        | 6.94 | 17397.5     | 6.28E+03             | 1.05                            |
| R43      | 0.01           | 9.66                          | 0.22 | 24839.7     | 4.90E+03             | 0.95                            |
|          | 0.1            | 4.60                          | 1.85 | 23397.1     | 5.40E+03             | 0.97                            |
|          | 1.0            | -3.10                         | 4.32 | 21147.1     | 5.82E+03             | 0.99                            |
|          | 10             | -7.87                         | 5.83 | 19691.6     | 5.88E+03             | 0.99                            |
|          | 100            | -9.48                         | 6.34 | 19188.3     | 5.89E+03             | 0.99                            |
| R44      | 0.01           | 4.48                          | 1.80 | 22924.6     | 4.20E+03             | 0.82                            |
|          | 0.1            | -0.08                         | 3.26 | 21587.7     | 4.42E+03             | 0.79                            |
|          | 1.0            | -7.13                         | 5.51 | 19485.5     | 4.58E+03             | 0.78                            |
|          | 10             | -10.98                        | 6.73 | 18296.2     | 4.60E+03             | 0.77                            |
|          | 100            | -12.06                        | 7.07 | 17957.6     | 4.60E+03             | 0.77                            |
| R45      | 0.01           | 6.51                          | 1.22 | 23046.3     | 9.10E+03             | 1.77                            |
|          | 0.1            | 1.56                          | 2.81 | 21598.5     | 9.62E+03             | 1.73                            |
|          | 1.0            | -6.16                         | 5.28 | 19314.4     | 1.01E+04             | 1.70                            |
|          | 10             | -10.78                        | 6.74 | 17893.6     | 1.01E+04             | 1.70                            |
|          | 100            | -12.26                        | 7.21 | 17432.3     | 1.01E+04             | 1.70                            |
| R46      | 0.01           | 8.00                          | 0.79 | 24750.1     | 5.47E+03             | 1.06                            |
|          | 0.1            | 2.81                          | 2.46 | 23248.2     | 5.90E+03             | 1.06                            |
|          | 1.0            | -5.07                         | 4.98 | 20928.2     | 6.24E+03             | 1.06                            |
|          | 10             | -9.93                         | 6.52 | 19440.7     | 6.29E+03             | 1.06                            |
|          | 100            | -11.56                        | 7.04 | 18929.7     | 6.30E+03             | 1.06                            |
| R47      | 0.01           | 1.79                          | 2.67 | 23040       | 2.45E+03             | 0.48                            |
|          | 0.1            | -1.93                         | 3.85 | 21932.6     | 2.51E+03             | 0.45                            |
|          | 1.0            | -8.19                         | 5.84 | 20035.4     | 2.55E+03             | 0.43                            |
|          | 10             | -11.28                        | 6.82 | 19075.5     | 2.56E+03             | 0.43                            |

|                         |             |               |             |                 |                 |                         |
|-------------------------|-------------|---------------|-------------|-----------------|-----------------|-------------------------|
|                         | 100         | -12.00        | 7.05        | 18847.5         | 2.56E+03        | 0.43                    |
| <b>1, 6-H(p)-(L, R)</b> | <b>0.01</b> | <b>5.61</b>   | <b>1.46</b> | <b>23085.38</b> | <b>5.15E+03</b> | <b>3.71<sup>#</sup></b> |
|                         | <b>0.1</b>  | <b>0.86</b>   | <b>2.98</b> | <b>21719.66</b> | <b>5.57E+03</b> | <b>3.84<sup>#</sup></b> |
|                         | <b>1.0</b>  | <b>-6.51</b>  | <b>5.34</b> | <b>19551.59</b> | <b>5.90E+03</b> | <b>3.94<sup>#</sup></b> |
|                         | <b>10</b>   | <b>-10.92</b> | <b>6.74</b> | <b>18201.44</b> | <b>5.95E+03</b> | <b>3.96<sup>#</sup></b> |
|                         | <b>100</b>  | <b>-12.33</b> | <b>7.19</b> | <b>17760.93</b> | <b>5.96E+03</b> | <b>3.96<sup>#</sup></b> |
| R48                     | 0.01        | -0.94         | 3.36        | 21959           | 6.51E+02        | 0.52                    |
|                         | 0.1         | -4.21         | 4.4         | 20985.3         | 6.90E+02        | <b>0.53</b>             |
|                         | 1.0         | -9.13         | 5.97        | 19489.4         | 9.08E+02        | <b>0.57</b>             |
|                         | 10          | -11.08        | 6.58        | 18883.7         | 7.41E+02        | <b>0.54</b>             |
|                         | 100         | -11.44        | 6.69        | 18770.5         | 7.42E+02        | <b>0.54</b>             |
| R49                     | 0.01        | 2.66          | 2.33        | 22430.6         | 2.05E+03        | 1.65                    |
|                         | 0.1         | -1.42         | 3.64        | 21225           | 2.22E+03        | 1.71                    |
|                         | 1.0         | -7.83         | 5.68        | 19297.1         | 3.07E+03        | 1.91                    |
|                         | 10          | -11.02        | 6.69        | 18307.7         | 2.50E+03        | 1.81                    |
|                         | 100         | -11.80        | 6.94        | 18063.2         | 2.51E+03        | 1.82                    |
| R50                     | 0.01        | -6.35         | 4.94        | 19677.2         | 4.01E+02        | 0.32                    |
|                         | 0.1         | -7.81         | 5.4         | 19230.6         | 4.06E+02        | 0.31                    |
|                         | 1.0         | -10.38        | 6.21        | 18432.6         | 5.04E+02        | 0.31                    |
|                         | 10          | -11.11        | 6.44        | 18202.6         | 4.14E+02        | 0.30                    |
|                         | 100         | -11.20        | 6.47        | 18172.9         | 4.14E+02        | 0.30                    |
| R51                     | 0.01        | -0.42         | 3.22        | 21512.5         | 1.15E+03        | 0.93                    |
|                         | 0.1         | -3.69         | 4.27        | 20534.8         | 1.22E+03        | 0.94                    |
|                         | 1.0         | -8.94         | 5.93        | 18936.1         | 1.57E+03        | 0.98                    |
|                         | 10          | -11.16        | 6.64        | 18243           | 1.31E+03        | 0.95                    |
|                         | 100         | -11.60        | 6.77        | 18105.1         | 1.31E+03        | 0.95                    |
| R52                     | 0.01        | -0.94         | 3.37        | 20666.4         | 1.57E+03        | 1.26                    |

|                         |             |               |             |                 |                 |                         |
|-------------------------|-------------|---------------|-------------|-----------------|-----------------|-------------------------|
|                         | 0.1         | -3.54         | 4.2         | 19880.3         | 1.63E+03        | 1.25                    |
|                         | 1.0         | -8.10         | 5.64        | 18486.2         | 2.04E+03        | 1.27                    |
|                         | 10          | -9.85         | 6.2         | 17936.9         | 1.72E+03        | 1.24                    |
|                         | 100         | -10.15        | 6.29        | 17842.5         | 1.72E+03        | 1.24                    |
| R53                     | 0.01        | 5.11          | 1.61        | 22329.7         | 2.28E+03        | 1.84                    |
|                         | 0.1         | 1.17          | 2.87        | 21162.2         | 2.31E+03        | 1.78                    |
|                         | 1.0         | -5.27         | 4.92        | 19229.4         | 2.33E+03        | 1.45                    |
|                         | 10          | -8.46         | 5.93        | 18241.4         | 2.33E+03        | 1.69                    |
|                         | 100         | -9.21         | 6.16        | 18006.3         | 2.33E+03        | 1.69                    |
| R54                     | 0.01        | -0.53         | 3.26        | 20757           | 5.93E+02        | 0.48                    |
|                         | 0.1         | -3.26         | 4.12        | 19935.9         | 6.13E+02        | 0.47                    |
|                         | 1.0         | -7.95         | 5.61        | 18502           | 8.14E+02        | 0.51                    |
|                         | 10          | -9.78         | 6.19        | 17930.5         | 6.44E+02        | 0.47                    |
|                         | 100         | -10.09        | 6.29        | 17830.6         | 6.44E+02        | 0.47                    |
| <b>1, 7-H(p)-(L, R)</b> | <b>0.01</b> | <b>-1.79</b>  | <b>3.63</b> | <b>20763.14</b> | <b>1.24E+03</b> | <b>5.70<sup>#</sup></b> |
|                         | <b>0.1</b>  | <b>-4.74</b>  | <b>4.57</b> | <b>19890.69</b> | <b>1.30E+03</b> | <b>5.69<sup>#</sup></b> |
|                         | <b>1.0</b>  | <b>-9.17</b>  | <b>5.99</b> | <b>18611.54</b> | <b>1.63E+03</b> | <b>6.08<sup>#</sup></b> |
|                         | <b>10</b>   | <b>-11.81</b> | <b>6.81</b> | <b>17749.60</b> | <b>1.38E+03</b> | <b>6.05<sup>#</sup></b> |
|                         | <b>100</b>  | <b>-12.26</b> | <b>6.95</b> | <b>17611.87</b> | <b>1.38E+03</b> | <b>6.06<sup>#</sup></b> |
| R55                     | 0.01        | 3.28          | 1.91        | 18713.7         | 5.26E+03        | 0.61                    |
|                         | 0.1         | 1.22          | 2.57        | 18095.4         | 5.43E+03        | 0.61                    |
|                         | 1.0         | -2.11         | 3.63        | 17077.6         | 6.08E+03        | 0.60                    |
|                         | 10          | -3.12         | 3.95        | 16763.1         | 5.66E+03        | 0.60                    |
|                         | 100         | -3.26         | 3.99        | 16719.5         | 5.67E+03        | 0.60                    |
| R56                     | 0.01        | 1.97          | 2.32        | 17866.1         | 6.51E+03        | 0.76                    |
|                         | 0.1         | 0.04          | 2.93        | 17284.3         | 6.69E+03        | 0.75                    |



|                         |             |              |             |                 |                 |                         |
|-------------------------|-------------|--------------|-------------|-----------------|-----------------|-------------------------|
|                         | 1.0         | -3.30        | 3.99        | 16262.6         | 7.56E+03        | 0.75                    |
|                         | 10          | -4.34        | 4.32        | 15937.1         | 6.97E+03        | 0.74                    |
|                         | 100         | -4.49        | 4.37        | 15891.6         | 6.98E+03        | 0.74                    |
| R57                     | 0.01        | 6.21         | 1.06        | 18781           | 1.45E+04        | 1.68                    |
|                         | 0.1         | 3.78         | 1.84        | 18058.7         | 1.51E+04        | 1.69                    |
|                         | 1.0         | -0.29        | 3.13        | 16824.4         | 1.70E+04        | 1.68                    |
|                         | 10          | -1.71        | 3.58        | 16385.1         | 1.61E+04        | 1.71                    |
|                         | 100         | -1.92        | 3.65        | 16317.6         | 1.61E+04        | 1.71                    |
| R58                     | 0.01        | 3.45         | 1.92        | 18714           | 8.13E+03        | 0.95                    |
|                         | 0.1         | 1.07         | 2.68        | 17999.2         | 8.44E+03        | 0.95                    |
|                         | 1.0         | -3.01        | 3.97        | 16761.5         | 9.81E+03        | 0.97                    |
|                         | 10          | -4.42        | 4.42        | 16322.1         | 8.95E+03        | 0.95                    |
|                         | 100         | -4.63        | 4.49        | 16254.8         | 8.96E+03        | 0.95                    |
| <b>1, 8-H(p)-(L, R)</b> | <b>0.01</b> | <b>3.89</b>  | <b>1.75</b> | <b>18415.72</b> | <b>8.59E+03</b> | <b>2.75<sup>#</sup></b> |
|                         | <b>0.1</b>  | <b>1.66</b>  | <b>2.46</b> | <b>17746.11</b> | <b>8.91E+03</b> | <b>2.78<sup>#</sup></b> |
|                         | <b>1.0</b>  | <b>-2.14</b> | <b>3.67</b> | <b>16593.51</b> | <b>1.01E+04</b> | <b>2.79<sup>#</sup></b> |
|                         | <b>10</b>   | <b>-3.41</b> | <b>4.07</b> | <b>16196.35</b> | <b>9.42E+03</b> | <b>2.84<sup>#</sup></b> |
|                         | <b>100</b>  | <b>-3.60</b> | <b>4.13</b> | <b>16136.84</b> | <b>9.42E+03</b> | <b>2.84<sup>#</sup></b> |

<sup>e</sup>  $k_{ave}$  is the average rate constants of 800 K for each reaction class.

<sup>#</sup> The uncertainty factor values of the pressure-dependent rate rule at 800 K for each class at different pressures (The ratios of the largest rate constant to the smallest rate constant at 800 K in each class at different pressures).

**Table S11.** Calculated pressure-dependent rate constants, rate rules, ratios of rate constants of reactions to the average value of the reactions and uncertainty factor values of the rate rule in subclasses of (R, L) at different pressures.

| Reaction | Pressure (atm) | Modified Arrhenius parameters |          |                    | T=800K                      |                                      |
|----------|----------------|-------------------------------|----------|--------------------|-----------------------------|--------------------------------------|
|          |                | Log A (s <sup>-1</sup> )      | <i>n</i> | <i>E</i> (cal/mol) | <i>k</i> (s <sup>-1</sup> ) | <i>k/k<sub>ave</sub><sup>e</sup></i> |
| R59      | 0.01           | 11.98                         | -0.48    | 26492.2            | 3.11E+03                    | 1.00                                 |
|          | 0.1            | 6.81                          | 1.19     | 25038.1            | 3.53E+03                    | 1.00                                 |
|          | 1.0            | -0.29                         | 3.46     | 22970.8            | 3.83E+03                    | 1.00                                 |

|                         |             |              |              |                 |                 |              |
|-------------------------|-------------|--------------|--------------|-----------------|-----------------|--------------|
|                         | 10          | -4.22        | 4.71         | 21772.2         | 3.88E+03        | 1.00         |
|                         | 100         | -5.34        | 5.07         | 21425.4         | 3.88E+03        | 1.00         |
| <b>1, 6-H(p)-(R, L)</b> | <b>0.01</b> | <b>11.98</b> | <b>-0.48</b> | <b>26492.2</b>  | <b>3.11E+03</b> | <b>1.00#</b> |
|                         | <b>0.1</b>  | <b>6.81</b>  | <b>1.19</b>  | <b>25038.1</b>  | <b>3.53E+03</b> | <b>1.00#</b> |
|                         | <b>1.0</b>  | <b>-0.29</b> | <b>3.46</b>  | <b>22970.8</b>  | <b>3.83E+03</b> | <b>1.00#</b> |
|                         | <b>10</b>   | <b>-4.22</b> | <b>4.71</b>  | <b>21772.2</b>  | <b>3.88E+03</b> | <b>1.00#</b> |
|                         | <b>100</b>  | <b>-5.34</b> | <b>5.07</b>  | <b>21425.4</b>  | <b>3.88E+03</b> | <b>1.00#</b> |
| R60                     | 0.01        | 15.33        | -1.59        | 22777.8         | 4.66E+04        | 0.71         |
|                         | 0.1         | 9.05         | 0.45         | 21067.4         | 5.82E+04        | 0.69         |
|                         | 1.0         | 0.93         | 3.08         | 18809.3         | 7.00E+04        | 0.62         |
|                         | 10          | -4.91        | 4.94         | 17072           | 7.25E+04        | 0.57         |
|                         | 100         | -7.30        | 5.70         | 16335.4         | 7.28E+04        | 0.56         |
| R61                     | 0.01        | 17.18        | -2.13        | 22692.5         | 6.27E+04        | 0.95         |
|                         | 0.1         | 10.55        | 0.03         | 20885.5         | 8.27E+04        | 0.98         |
|                         | 1.0         | 2.18         | 2.74         | 18587.4         | 1.15E+05        | 1.01         |
|                         | 10          | -4.31        | 4.82         | 16672.9         | 1.30E+05        | 1.03         |
|                         | 100         | -7.29        | 5.76         | 15757.6         | 1.34E+05        | 1.03         |
| R62                     | 0.01        | 19.37        | -2.76        | 23320.7         | 9.73E+04        | 1.48         |
|                         | 0.1         | 12.54        | -0.54        | 21451.3         | 1.28E+05        | 1.52         |
|                         | 1.0         | 4.03         | 2.22         | 19131.4         | 1.81E+05        | 1.60         |
|                         | 10          | -2.81        | 4.41         | 17118.8         | 2.85E+05        | 1.65         |
|                         | 100         | -6.17        | 5.48         | 16086.4         | 2.15E+05        | 1.66         |
| R63                     | 0.01        | 14.36        | -1.26        | 21714.4         | 5.66E+04        | 0.86         |
|                         | 0.1         | 8.46         | 0.64         | 20049.7         | 6.85E+04        | 0.81         |
|                         | 1.0         | 0.46         | 3.22         | 17780.6         | 8.72E+04        | 0.77         |
|                         | 10          | -4.94        | 4.94         | 16158.5         | 9.48E+04        | 0.75         |
|                         | 100         | -6.91        | 5.56         | 15548.3         | 9.61E+04        | 0.74         |
| <b>1, 6-H(s)-(R, L)</b> | <b>0.01</b> | <b>17.22</b> | <b>-2.14</b> | <b>22743.73</b> | <b>6.58E+04</b> | <b>2.09#</b> |
|                         | <b>0.1</b>  | <b>10.77</b> | <b>-0.05</b> | <b>20972.87</b> | <b>8.44E+04</b> | <b>2.21#</b> |

|                         |             |              |             |                 |                 |                         |
|-------------------------|-------------|--------------|-------------|-----------------|-----------------|-------------------------|
|                         | <b>1.0</b>  | <b>2.44</b>  | <b>2.65</b> | <b>18671.62</b> | <b>1.13E+05</b> | <b>2.58<sup>#</sup></b> |
|                         | <b>10</b>   | <b>-3.92</b> | <b>4.69</b> | <b>16785.22</b> | <b>1.27E+05</b> | <b>2.87<sup>#</sup></b> |
|                         | <b>100</b>  | <b>-6.82</b> | <b>5.60</b> | <b>15894.64</b> | <b>1.30E+05</b> | <b>2.96<sup>#</sup></b> |
| R64                     | 0.01        | -1.03        | 3.79        | 14968.5         | 7.84E+05        | 1.18                    |
|                         | 0.1         | -1.16        | 3.84        | 14928.2         | 7.85E+05        | 0.94                    |
|                         | 1.0         | -1.98        | 4.09        | 14673.5         | 7.89E+05        | 0.68                    |
|                         | 10          | -4.21        | 4.8         | 13977.5         | 7.98E+05        | 0.56                    |
|                         | 100         | -6.59        | 5.55        | 13229.5         | 8.03E+05        | 0.53                    |
| R65                     | 0.01        | 22.86        | -3.94       | 20792.5         | 5.41E+05        | 0.82                    |
|                         | 0.1         | 15.70        | -1.57       | 19025.2         | 8.80E+05        | 1.12                    |
|                         | 1.0         | 8.37         | 0.87        | 17291.5         | 1.53E+06        | 1.32                    |
|                         | 10          | 0.82         | 3.32        | 15204.1         | 2.03E+06        | 1.44                    |
|                         | 100         | -4.36        | 4.97        | 13662.5         | 2.22E+06        | 1.47                    |
| <b>1, 6-H(t)-(R, L)</b> | <b>0.01</b> | <b>3.50</b>  | <b>2.28</b> | <b>15499.24</b> | <b>6.62E+05</b> | <b>1.45<sup>#</sup></b> |
|                         | <b>0.1</b>  | <b>4.36</b>  | <b>2.05</b> | <b>15938.73</b> | <b>8.32E+05</b> | <b>1.12<sup>#</sup></b> |
|                         | <b>1.0</b>  | <b>3.68</b>  | <b>2.33</b> | <b>16026.17</b> | <b>1.16E+06</b> | <b>1.95<sup>#</sup></b> |
|                         | <b>10</b>   | <b>-0.85</b> | <b>3.80</b> | <b>14789.17</b> | <b>1.41E+06</b> | <b>2.55<sup>#</sup></b> |
|                         | <b>100</b>  | <b>-5.03</b> | <b>5.14</b> | <b>13534.31</b> | <b>1.51E+06</b> | <b>2.77<sup>#</sup></b> |
| R66                     | 0.01        | 9.08         | 0.25        | 22478.4         | 1.30E+04        | 0.30                    |
|                         | 0.1         | 6.00         | 1.24        | 21567.6         | 1.40E+04        | 0.28                    |
|                         | 1.0         | 1.44         | 2.69        | 20193.4         | 1.47E+04        | 0.25                    |
|                         | 10          | -0.20        | 3.21        | 19686.4         | 1.48E+04        | 0.25                    |
|                         | 100         | -0.47        | 3.29        | 19602.6         | 1.48E+04        | 0.25                    |
| R67                     | 0.01        | 13.65        | -1.09       | 23686.5         | 5.49E+04        | 1.25                    |
|                         | 0.1         | 9.34         | 0.30        | 22439.9         | 6.18E+04        | 1.25                    |
|                         | 1.0         | 3.19         | 2.26        | 20625.8         | 6.84E+04        | 1.18                    |
|                         | 10          | 0.29         | 3.18        | 19736.3         | 6.95E+04        | 1.18                    |
|                         | 100         | -0.35        | 3.39        | 19535.1         | 6.97E+04        | 1.17                    |
| R68                     | 0.01        | 17.50        | -2.21       | 23603.1         | 4.27E+04        | 0.97                    |
|                         | 0.1         | 13.12        | -0.81       | 22336.7         | 4.76E+04        | 0.96                    |

|                         |             |              |              |                 |                 |                         |
|-------------------------|-------------|--------------|--------------|-----------------|-----------------|-------------------------|
|                         | 1.0         | 6.53         | 1.3          | 20406.6         | 5.84E+04        | 0.98                    |
|                         | 10          | 3.10         | 2.39         | 19361.3         | 5.72E+04        | 0.97                    |
|                         | 100         | 2.28         | 2.65         | 19103.1         | 5.75E+04        | 0.97                    |
| R69                     | 0.01        | 19.32        | -2.76        | 23764.4         | 6.46E+04        | 1.48                    |
|                         | 0.1         | 14.26        | -1.13        | 22317.5         | 7.47E+04        | 1.51                    |
|                         | 1.0         | 7.08         | 1.17         | 20244.5         | 9.75E+04        | 1.63                    |
|                         | 10          | 2.86         | 2.51         | 18966.2         | 9.49E+04        | 1.61                    |
|                         | 100         | 1.63         | 2.9          | 18585           | 9.57E+04        | 1.61                    |
| <b>1, 7-H(p)-(R, L)</b> | <b>0.01</b> | <b>18.39</b> | <b>-2.50</b> | <b>23865.63</b> | <b>4.38E+04</b> | <b>4.96<sup>#</sup></b> |
|                         | <b>0.1</b>  | <b>13.49</b> | <b>-0.92</b> | <b>22461.84</b> | <b>4.95E+04</b> | <b>5.35<sup>#</sup></b> |
|                         | <b>1.0</b>  | <b>6.19</b>  | <b>1.41</b>  | <b>20317.91</b> | <b>5.98E+04</b> | <b>6.65<sup>#</sup></b> |
|                         | <b>10</b>   | <b>2.32</b>  | <b>2.65</b>  | <b>19154.23</b> | <b>5.91E+04</b> | <b>6.43<sup>#</sup></b> |
|                         | <b>100</b>  | <b>1.14</b>  | <b>3.02</b>  | <b>18785.27</b> | <b>5.94E+04</b> | <b>6.47<sup>#</sup></b> |
| R70                     | 0.01        | 22.15        | -3.71        | 22457.5         | 2.33E+05        | 0.98                    |
|                         | 0.1         | 16.03        | -1.72        | 20799.9         | 2.92E+05        | 1.11                    |
|                         | 1.0         | 8.63         | 0.69         | 18782.3         | 3.62E+05        | 1.24                    |
|                         | 10          | 3.39         | 2.37         | 17237.6         | 3.77E+05        | 1.27                    |
|                         | 100         | 1.45         | 2.98         | 16643.4         | 3.79E+05        | 1.27                    |
| R71                     | 0.01        | 10.28        | 0.11         | 18678.7         | 3.45E+05        | 1.44                    |
|                         | 0.1         | 9.29         | 0.43         | 18371.7         | 3.45E+05        | 1.31                    |
|                         | 1.0         | 6.57         | 1.29         | 17529           | 3.45E+05        | 1.18                    |
|                         | 10          | 3.52         | 2.25         | 16574.5         | 3.45E+05        | 1.16                    |
|                         | 100         | 2.27         | 2.64         | 16178.8         | 3.45E+05        | 1.16                    |
| R72                     | 0.01        | 11.66        | -0.57        | 18245.5         | 6.04E+04        | 0.58                    |
|                         | 0.1         | 6.89         | 0.96         | 16886.7         | 6.70E+04        | 0.58                    |
|                         | 1.0         | 0.27         | 3.09         | 14989.2         | 7.36E+04        | 0.58                    |
|                         | 10          | -3.32        | 4.23         | 13903.9         | 7.47E+04        | 0.57                    |
|                         | 100         | -4.23        | 4.52         | 13623.4         | 7.49E+04        | 0.57                    |

|                         |             |              |              |                 |                 |                         |
|-------------------------|-------------|--------------|--------------|-----------------|-----------------|-------------------------|
| <b>1, 7-H(s)-(R, L)</b> | <b>0.01</b> | <b>12.61</b> | <b>-0.71</b> | <b>19180.96</b> | <b>2.39E+05</b> | <b>2.49<sup>#</sup></b> |
|                         | <b>0.1</b>  | <b>10.27</b> | <b>0.05</b>  | <b>18542.93</b> | <b>2.63E+05</b> | <b>2.26<sup>#</sup></b> |
|                         | <b>1.0</b>  | <b>5.35</b>  | <b>1.63</b>  | <b>17144.19</b> | <b>2.92E+05</b> | <b>2.06<sup>#</sup></b> |
|                         | <b>10</b>   | <b>1.27</b>  | <b>2.93</b>  | <b>15913.08</b> | <b>2.98E+05</b> | <b>2.03<sup>#</sup></b> |
|                         | <b>100</b>  | <b>-0.23</b> | <b>3.41</b>  | <b>15449.78</b> | <b>2.98E+05</b> | <b>2.02<sup>#</sup></b> |
| R73                     | 0.01        | 19.48        | -3.01        | 17865.6         | 9.24E+05        | 1.00                    |
|                         | 0.1         | 13.35        | -1.00        | 16264.9         | 1.25E+06        | 1.00                    |
|                         | 1.0         | 6.74         | 1.17         | 14568.4         | 1.72E+06        | 1.00                    |
|                         | 10          | 1.60         | 2.82         | 13088.6         | 1.85E+06        | 1.00                    |
|                         | 100         | -0.42        | 3.46         | 12476.1         | 1.87E+06        | 1.00                    |
| <b>1, 7-H(t)-(R, L)</b> | <b>0.01</b> | <b>19.48</b> | <b>-3.01</b> | <b>17865.6</b>  | <b>9.24E+05</b> | <b>1.00<sup>#</sup></b> |
|                         | <b>0.1</b>  | <b>13.35</b> | <b>-1.00</b> | <b>16264.9</b>  | <b>1.25E+06</b> | <b>1.00<sup>#</sup></b> |
|                         | <b>1.0</b>  | <b>6.74</b>  | <b>1.17</b>  | <b>14568.4</b>  | <b>1.72E+06</b> | <b>1.00<sup>#</sup></b> |
|                         | <b>10</b>   | <b>1.60</b>  | <b>2.82</b>  | <b>13088.6</b>  | <b>1.85E+06</b> | <b>1.00<sup>#</sup></b> |
|                         | <b>100</b>  | <b>-0.42</b> | <b>3.46</b>  | <b>12476.1</b>  | <b>1.87E+06</b> | <b>1.00<sup>#</sup></b> |
| R74                     | 0.01        | 9.58         | 0.28         | 18388.6         | 2.42E+05        | 0.75                    |
|                         | 0.1         | 8.87         | 0.51         | 18165.6         | 2.42E+05        | 0.66                    |
|                         | 1.0         | 6.89         | 1.13         | 17548.2         | 2.42E+05        | 0.58                    |
|                         | 10          | 4.82         | 1.78         | 16895.9         | 2.42E+05        | 0.57                    |
|                         | 100         | 4.09         | 2.01         | 16663.9         | 2.42E+05        | 0.57                    |
| R75                     | 0.01        | 23.11        | -4.04        | 21077.4         | 4.89E+05        | 1.51                    |
|                         | 0.1         | 17.83        | -2.32        | 19630.6         | 5.86E+05        | 1.60                    |
|                         | 1.0         | 11.39        | -0.23        | 17869.4         | 7.04E+05        | 1.69                    |
|                         | 10          | 7.39         | 1.04         | 16685.3         | 7.27E+05        | 1.70                    |
|                         | 100         | 6.22         | 1.41         | 16327.8         | 7.29E+05        | 1.71                    |
| R76                     | 0.01        | 21.62        | -3.55        | 22048           | 2.38E+05        | 0.74                    |
|                         | 0.1         | 16.75        | -1.97        | 20678.3         | 2.69E+05        | 0.74                    |
|                         | 1.0         | 10.28        | 0.12         | 18850.1         | 3.04E+05        | 0.73                    |

|                         |             |              |              |                 |                 |                         |
|-------------------------|-------------|--------------|--------------|-----------------|-----------------|-------------------------|
|                         | 10          | 6.65         | 1.27         | 17763.5         | 3.10E+05        | 0.73                    |
|                         | 100         | 5.72         | 1.57         | 17474.5         | 3.11E+05        | 0.73                    |
| <b>1, 8-H(p)-(R, L)</b> | <b>0.01</b> | <b>16.24</b> | <b>-1.87</b> | <b>19517.89</b> | <b>3.23E+05</b> | <b>2.05<sup>#</sup></b> |
|                         | <b>0.1</b>  | <b>13.89</b> | <b>-1.10</b> | <b>18905.86</b> | <b>3.66E+05</b> | <b>2.42<sup>#</sup></b> |
|                         | <b>1.0</b>  | <b>9.32</b>  | <b>0.38</b>  | <b>17643.51</b> | <b>4.17E+05</b> | <b>2.90<sup>#</sup></b> |
|                         | <b>10</b>   | <b>5.97</b>  | <b>1.45</b>  | <b>16640.60</b> | <b>4.26E+05</b> | <b>3.00<sup>#</sup></b> |
|                         | <b>100</b>  | <b>4.96</b>  | <b>1.77</b>  | <b>16332.07</b> | <b>4.27E+05</b> | <b>3.01<sup>#</sup></b> |
| R77                     | 0.01        | 12.10        | -0.48        | 16279.2         | 1.89E+06        | 1.00                    |
|                         | 0.1         | 11.60        | -0.32        | 16124.3         | 1.89E+06        | 1.00                    |
|                         | 1.0         | 9.81         | 0.25         | 15567.3         | 1.89E+06        | 1.00                    |
|                         | 10          | 7.25         | 1.05         | 14765           | 1.89E+06        | 1.00                    |
|                         | 100         | 5.99         | 1.45         | 14368.6         | 1.89E+06        | 1.00                    |
| <b>1, 8-H(s)-(R, L)</b> | <b>0.01</b> | <b>12.10</b> | <b>-0.48</b> | <b>16279.2</b>  | <b>1.89E+06</b> | <b>1.00<sup>#</sup></b> |
|                         | <b>0.1</b>  | <b>11.60</b> | <b>-0.32</b> | <b>16124.3</b>  | <b>1.89E+06</b> | <b>1.00<sup>#</sup></b> |
|                         | <b>1.0</b>  | <b>9.81</b>  | <b>0.25</b>  | <b>15567.3</b>  | <b>1.89E+06</b> | <b>1.00<sup>#</sup></b> |
|                         | <b>10</b>   | <b>7.25</b>  | <b>1.05</b>  | <b>14765</b>    | <b>1.89E+06</b> | <b>1.00<sup>#</sup></b> |
|                         | <b>100</b>  | <b>5.99</b>  | <b>1.45</b>  | <b>14368.6</b>  | <b>1.89E+06</b> | <b>1.00<sup>#</sup></b> |
| R78                     | 0.01        | 12.50        | -0.79        | 20922.5         | 3.13E+04        | 1.00                    |
|                         | 0.1         | 9.47         | 0.18         | 20030.8         | 3.34E+04        | 1.00                    |
|                         | 1.0         | 4.58         | 1.74         | 18571.5         | 3.75E+04        | 1.00                    |
|                         | 10          | 2.66         | 2.35         | 17979.5         | 3.68E+04        | 1.00                    |
|                         | 100         | 2.33         | 2.45         | 17876.4         | 3.69E+04        | 1.00                    |
| <b>1, 9-H(p)-(R, L)</b> | <b>0.01</b> | <b>12.50</b> | <b>-0.79</b> | <b>20922.5</b>  | <b>3.13E+04</b> | <b>1.00<sup>#</sup></b> |
|                         | <b>0.1</b>  | <b>9.47</b>  | <b>0.18</b>  | <b>20030.8</b>  | <b>3.34E+04</b> | <b>1.00<sup>#</sup></b> |
|                         | <b>1.0</b>  | <b>4.58</b>  | <b>1.74</b>  | <b>18571.5</b>  | <b>3.75E+04</b> | <b>1.00<sup>#</sup></b> |
|                         | <b>10</b>   | <b>2.66</b>  | <b>2.35</b>  | <b>17979.5</b>  | <b>3.68E+04</b> | <b>1.00<sup>#</sup></b> |
|                         | <b>100</b>  | <b>2.33</b>  | <b>2.45</b>  | <b>17876.4</b>  | <b>3.69E+04</b> | <b>1.00<sup>#</sup></b> |

<sup>e</sup>  $k_{ave}$  is the average rate constants of 800 K for each reaction class.

<sup>#</sup> The uncertainty factor values of the pressure-dependent rate rule at 800 K for each class at different

pressures (The ratios of the largest rate constant to the smallest rate constant at 800 K in each class at different pressures).

## 9. Cartesian coordinates for all reactants, transition states and products

r1  
C 0.46891 0.50782 -0.09913  
O 0.80051 1.5286 0.44607  
O 1.28904 -0.50151 -0.38768  
C 2.63787 -0.32254 0.05176  
H 3.07678 0.55776 -0.42225  
H 2.66578 -0.19402 1.1353  
O -1.28498 -1.14948 -0.41388  
O -1.11637 -1.4965 0.83218  
H 3.16731 -1.22594 -0.24326  
C -1.96369 1.1349 0.08576  
H -2.95811 0.95665 -0.32651  
H -1.96668 0.92025 1.15583  
H -1.68811 2.1799 -0.05917  
C -0.94984 0.24466 -0.59937  
H -0.96207 0.36746 -1.68755

r2  
C -0.03952 -0.70722 0.27277  
H -0.0507 -1.68813 -0.21464  
H -0.0328 -0.89329 1.35179  
C 1.24181 -0.00699 -0.11253  
O 1.31282 1.02141 -0.74027  
O 2.31046 -0.68611 0.32315  
C 3.572 -0.1056 -0.01485  
H 3.67241 -0.01922 -1.09852  
H 3.66334 0.88818 0.4281  
H 4.32544 -0.77832 0.3899  
C -1.26092 0.0986 -0.13578  
H -1.221 0.34193 -1.20133  
C -1.4924 1.34523 0.69354  
H -0.67331 2.04737 0.52952  
H -2.43107 1.81394 0.39419  
H -1.54491 1.08919 1.75589  
O -2.37526 -0.82099 0.04473  
O -3.47719 -0.33253 -0.44683

r3  
C 0.38003 -0.25866 -0.45055  
C 1.74019 0.22214 -0.00453  
O 1.96394 1.27448 0.54104  
O 2.69489 -0.67312 -0.30378  
C 4.01771 -0.28559 0.06794  
H 4.30665 0.63049 -0.45176  
H 4.07554 -0.11132 1.14429  
H 0.2363 -1.28088 -0.0883  
H 0.39573 -0.32368 -1.5458  
H 4.66312 -1.11226 -0.22309  
C -2.08468 0.31581 -0.5472  
H -2.06131 0.37809 -1.64091  
C -3.22349 1.13761 0.02503  
H -4.17454 0.85049 -0.42829  
H -3.28185 0.9771 1.1039  
H -3.04906 2.19911 -0.16557

|   |          |          |          |
|---|----------|----------|----------|
| C | -0.72714 | 0.66608  | 0.03788  |
| H | -0.48944 | 1.70023  | -0.22948 |
| H | -0.78918 | 0.62717  | 1.12928  |
| O | -2.36861 | -1.10343 | -0.33718 |
| O | -2.34619 | -1.41279 | 0.92796  |

#### r4

|   |          |          |          |
|---|----------|----------|----------|
| C | 0.03275  | 0.56299  | -0.27143 |
| C | -1.23786 | -0.25817 | -0.16902 |
| O | -1.28667 | -1.45719 | -0.03272 |
| O | -2.32806 | 0.51596  | -0.26236 |
| C | -3.57207 | -0.18385 | -0.19279 |
| H | -3.63817 | -0.92207 | -0.99437 |
| C | 1.24436  | -0.35337 | -0.10631 |
| H | 1.16262  | -1.20322 | -0.78918 |
| C | 0.01849  | 1.75435  | 0.69301  |
| H | 0.97691  | 2.27672  | 0.64845  |
| H | -0.7764  | 2.44896  | 0.42008  |
| H | -3.66564 | -0.6964  | 0.76676  |
| C | 1.52186  | -0.83361 | 1.30431  |
| H | 0.6728   | -1.41906 | 1.66206  |
| H | 2.41247  | -1.46382 | 1.29925  |
| H | 1.69562  | 0.00945  | 1.97745  |
| H | -0.15306 | 1.43073  | 1.72302  |
| H | 0.06076  | 0.95484  | -1.29704 |
| O | 2.36749  | 0.44936  | -0.57363 |
| O | 3.44128  | -0.27315 | -0.71399 |
| H | -4.34539 | 0.57393  | -0.30159 |

#### r5

|   |          |          |          |
|---|----------|----------|----------|
| C | -0.89952 | -0.23267 | 0.16998  |
| C | 0.56278  | -0.42657 | -0.24113 |
| O | 0.92185  | -1.18272 | -1.10641 |
| O | 1.38539  | 0.29924  | 0.51891  |
| C | 2.77023  | 0.17969  | 0.18609  |
| H | 3.10129  | -0.85424 | 0.30258  |
| C | -1.15715 | -0.8826  | 1.52162  |
| H | -0.47588 | -0.47806 | 2.27229  |
| H | -2.18796 | -0.69176 | 1.82917  |
| H | -1.00775 | -1.96192 | 1.44325  |
| C | -1.82883 | -0.71413 | -0.927   |
| H | -2.86674 | -0.57653 | -0.61579 |
| H | -1.64167 | -0.14866 | -1.8414  |
| H | -1.64201 | -1.76985 | -1.12773 |
| O | -1.12476 | 1.19071  | 0.3915   |
| O | -0.7072  | 1.89422  | -0.62246 |
| H | 2.93506  | 0.49154  | -0.84704 |
| H | 3.29829  | 0.8356   | 0.8751   |

#### r6

|   |          |          |          |
|---|----------|----------|----------|
| C | -0.54172 | -0.11246 | 0.28024  |
| C | 0.86705  | -0.45898 | -0.21312 |
| O | 1.10241  | -1.31128 | -1.03053 |
| O | 1.79879  | 0.25755  | 0.41958  |
| C | 3.14163  | -0.00991 | 0.00983  |
| H | 3.39181  | -1.05713 | 0.19139  |
| C | -1.58123 | -0.59842 | -0.7246  |
| H | -1.35876 | -0.10536 | -1.67587 |
| H | 3.25917  | 0.20435  | -1.05411 |
| H | -1.41218 | -1.6673  | -0.88011 |
| O | -0.63412 | 1.33888  | 0.4002   |
| O | -0.25234 | 1.92848  | -0.69709 |



|   |          |          |          |
|---|----------|----------|----------|
| H | 3.76996  | 0.64731  | 0.60727  |
| C | -3.01892 | -0.31934 | -0.29845 |
| H | -3.30665 | -0.90921 | 0.57594  |
| H | -3.15802 | 0.73864  | -0.05875 |
| H | -3.70655 | -0.57374 | -1.10766 |
| C | -0.73843 | -0.62399 | 1.70034  |
| H | -1.68719 | -0.2583  | 2.09794  |
| H | -0.75219 | -1.71664 | 1.70011  |
| H | 0.07245  | -0.273   | 2.34105  |

r7

|   |          |          |          |
|---|----------|----------|----------|
| C | -0.28236 | -0.67537 | -0.92692 |
| H | -0.52387 | -1.72255 | -1.13086 |
| C | 1.05251  | -0.64885 | -0.21439 |
| O | 1.34466  | -1.3497  | 0.7237   |
| O | 1.88467  | 0.2431   | -0.7665  |
| C | 3.11933  | 0.41089  | -0.07075 |
| H | 2.92588  | 0.77171  | 0.9421   |
| C | -1.60144 | -0.73431 | 1.2661   |
| H | -0.68642 | -0.64821 | 1.85084  |
| H | -2.4277  | -0.25601 | 1.79827  |
| H | -1.83021 | -1.79539 | 1.13899  |
| H | 3.65945  | -0.53627 | -0.01457 |
| H | -0.20775 | -0.13457 | -1.87295 |
| H | 3.68488  | 1.14669  | -0.63935 |
| C | -1.43254 | -0.08451 | -0.0978  |
| C | -2.7226  | -0.08929 | -0.90348 |
| H | -3.51982 | 0.39992  | -0.33903 |
| H | -2.58974 | 0.43749  | -1.85175 |
| H | -3.02446 | -1.11846 | -1.11203 |
| O | -1.16285 | 1.34805  | 0.09382  |
| O | -0.09869 | 1.5566   | 0.81321  |

r8

|   |          |          |          |
|---|----------|----------|----------|
| C | 0.05519  | -0.14927 | 0.22799  |
| C | -1.39286 | 0.22314  | 0.01592  |
| O | -1.80127 | 1.33627  | -0.20813 |
| O | -2.19093 | -0.85105 | 0.11612  |
| C | -3.58242 | -0.58464 | -0.06004 |
| H | -3.93474 | 0.12172  | 0.69464  |
| H | -3.76634 | -0.16077 | -1.04948 |
| H | 0.29749  | -0.9901  | -0.42867 |
| H | 0.16003  | -0.53456 | 1.24908  |
| H | -4.08488 | -1.54416 | 0.04695  |
| C | 2.4206   | 0.76937  | 0.34258  |
| H | 3.05238  | 1.6369   | 0.13888  |
| H | 2.54093  | 0.44851  | 1.38055  |
| O | 2.96448  | -0.28095 | -0.48902 |
| O | 2.69922  | -1.45918 | 0.00369  |
| C | 0.97128  | 1.04339  | -0.01506 |
| H | 0.62632  | 1.89468  | 0.58051  |
| H | 0.906    | 1.35504  | -1.06217 |

r9

|   |          |          |          |
|---|----------|----------|----------|
| C | -1.44045 | 0.68184  | 0.10399  |
| H | -1.31364 | 1.48963  | 0.8258   |
| C | -0.39203 | -0.40186 | 0.2716   |
| H | -0.58321 | -1.22066 | -0.42782 |
| H | -0.42532 | -0.8265  | 1.28001  |
| C | 0.98503  | 0.15937  | 0.021    |

|   |          |          |          |
|---|----------|----------|----------|
| O | 1.21693  | 1.31419  | -0.24359 |
| O | 1.92772  | -0.78456 | 0.1305   |
| C | 3.26431  | -0.32868 | -0.09011 |
| H | 3.36039  | 0.09723  | -1.09063 |
| H | 3.53157  | 0.43355  | 0.64475  |
| O | -2.75141 | 0.14167  | 0.37235  |
| O | -3.0845  | -0.73662 | -0.53188 |
| H | -1.43935 | 1.0917   | -0.90783 |
| H | 3.89861  | -1.20633 | 0.0178   |

#### r10

|   |          |          |          |
|---|----------|----------|----------|
| C | 2.18613  | 0.09651  | -0.02492 |
| O | 2.35407  | 1.27096  | -0.24181 |
| O | 3.19201  | -0.78654 | 0.08513  |
| C | 4.49772  | -0.22981 | -0.06975 |
| H | 4.60401  | 0.2242   | -1.05713 |
| H | 4.67783  | 0.53495  | 0.68862  |
| C | 0.84507  | -0.5733  | 0.1603   |
| H | 0.76681  | -1.38383 | -0.57322 |
| H | 0.84484  | -1.05737 | 1.14404  |
| H | 5.19235  | -1.05934 | 0.04848  |
| C | -0.30648 | 0.41389  | 0.02529  |
| H | -0.16442 | 1.2269   | 0.74582  |
| H | -0.2642  | 0.87851  | -0.96623 |
| C | -1.66037 | -0.25697 | 0.24101  |
| H | -1.81104 | -1.06725 | -0.48037 |
| H | -1.71206 | -0.69833 | 1.24338  |
| C | -2.79939 | 0.73289  | 0.08348  |
| H | -2.74341 | 1.543    | 0.81544  |
| H | -2.84241 | 1.14901  | -0.92717 |
| O | -4.06932 | 0.09815  | 0.34905  |
| O | -4.36731 | -0.75628 | -0.58914 |

#### r11

|   |          |          |          |
|---|----------|----------|----------|
| C | -0.21323 | -0.44854 | -0.73702 |
| H | -0.24137 | -1.41781 | -1.24763 |
| H | -0.1826  | 0.32467  | -1.50915 |
| C | -1.48224 | -0.3166  | 0.07617  |
| O | -1.56148 | -0.49198 | 1.26639  |
| O | -2.52737 | -0.00543 | -0.7017  |
| C | -3.77469 | 0.10365  | -0.01286 |
| H | -4.51408 | 0.34793  | -0.77317 |
| H | -4.02173 | -0.83987 | 0.47822  |
| H | -3.72141 | 0.89036  | 0.74219  |
| C | 1.024    | -0.35779 | 0.1366   |
| H | 0.88259  | -0.9337  | 1.05591  |
| C | 2.30668  | -0.74436 | -0.58287 |
| H | 2.20997  | -1.79344 | -0.8844  |
| H | 2.38163  | -0.14836 | -1.49804 |
| C | 3.54846  | -0.55032 | 0.28184  |
| H | 3.47747  | -1.12805 | 1.20836  |
| H | 4.44543  | -0.87352 | -0.25068 |
| H | 3.67216  | 0.50166  | 0.54847  |
| O | 1.12857  | 1.0088   | 0.64576  |
| O | 1.35504  | 1.85784  | -0.31559 |

#### r12

|   |         |          |          |
|---|---------|----------|----------|
| C | 0.81296 | -0.52548 | -0.08476 |
| O | 1.0509  | -1.58689 | 0.43221  |
| O | 1.73016 | 0.38809  | -0.39847 |
| C | 3.06777 | 0.04553  | -0.02668 |
| H | 3.38194 | -0.8647  | -0.54146 |

|   |          |          |          |
|---|----------|----------|----------|
| H | 3.68277  | 0.89171  | -0.32504 |
| H | 3.12837  | -0.11659 | 1.05103  |
| C | -0.58962 | -0.09837 | -0.50926 |
| H | -0.69744 | -0.27399 | -1.58639 |
| C | -1.6675  | -0.81968 | 0.28144  |
| H | -1.51671 | -0.58268 | 1.33903  |
| H | -1.48945 | -1.89209 | 0.16777  |
| C | -3.07092 | -0.4331  | -0.17238 |
| H | -3.22589 | -0.67287 | -1.22897 |
| H | -3.82396 | -0.97035 | 0.40751  |
| H | -3.24185 | 0.63805  | -0.0409  |
| O | -0.72961 | 1.3352   | -0.38994 |
| O | -0.49069 | 1.71737  | 0.83461  |

#### r13

|   |          |          |          |
|---|----------|----------|----------|
| C | 1.18919  | -0.54795 | -0.11157 |
| O | 1.25454  | -1.66037 | 0.34513  |
| O | 2.23678  | 0.24813  | -0.32081 |
| C | 3.49391  | -0.29686 | 0.08751  |
| H | 3.70885  | -1.21149 | -0.46877 |
| H | 4.2332   | 0.47136  | -0.12877 |
| H | 3.475    | -0.52636 | 1.15445  |
| C | -0.11661 | 0.09061  | -0.57886 |
| H | -0.18166 | -0.01024 | -1.66894 |
| C | -1.32744 | -0.51458 | 0.10753  |
| H | -1.23386 | -0.31957 | 1.18176  |
| H | -1.27269 | -1.59965 | -0.02393 |
| C | -2.64608 | 0.03686  | -0.42833 |
| H | -2.71289 | -0.16282 | -1.50536 |
| H | -2.65712 | 1.12599  | -0.31147 |
| O | -0.06842 | 1.52189  | -0.37832 |
| O | 0.15535  | 1.80064  | 0.87613  |
| C | -3.84697 | -0.57566 | 0.28629  |
| H | -4.78715 | -0.18022 | -0.10514 |
| H | -3.86168 | -1.66314 | 0.16525  |
| H | -3.81206 | -0.36069 | 1.35848  |

#### r14

|   |          |          |          |
|---|----------|----------|----------|
| C | -0.34846 | 0.29377  | -0.10203 |
| C | 1.03664  | -0.30371 | 0.02139  |
| O | 1.27663  | -1.40243 | 0.46183  |
| O | 1.98133  | 0.54069  | -0.41424 |
| C | 3.31842  | 0.04384  | -0.32578 |
| H | 3.56856  | -0.18988 | 0.71088  |
| C | -0.45506 | 1.61996  | 0.65741  |
| H | 0.26558  | 2.34034  | 0.26883  |
| H | -1.46046 | 2.03084  | 0.54799  |
| H | -0.25802 | 1.47132  | 1.72367  |
| H | 3.42675  | -0.8614  | -0.92667 |
| H | -0.53652 | 0.47659  | -1.16655 |
| H | 3.95694  | 0.83822  | -0.70705 |
| O | -2.699   | -0.22142 | 0.25619  |
| O | -3.0092  | -0.04135 | -0.99755 |
| C | -1.35649 | -0.73684 | 0.38633  |
| H | -1.23869 | -0.94256 | 1.45248  |
| H | -1.29251 | -1.66941 | -0.17736 |

#### r15

|   |         |          |          |
|---|---------|----------|----------|
| C | 0.40737 | -0.80933 | 0.16905  |
| H | 0.54886 | -1.25753 | 1.15924  |
| C | 1.64221 | -0.00326 | -0.16821 |
| O | 1.6481  | 1.0913   | -0.67398 |

|   |          |          |          |
|---|----------|----------|----------|
| O | 2.75861  | -0.6774  | 0.14875  |
| C | 3.9774   | -0.00548 | -0.17356 |
| H | 4.04123  | 0.17239  | -1.24907 |
| C | -0.86808 | 0.02838  | 0.10947  |
| H | 4.03079  | 0.95413  | 0.34463  |
| C | -0.91051 | 1.07832  | 1.21837  |
| H | -0.85904 | 0.60041  | 2.20389  |
| H | -0.07067 | 1.76864  | 1.12013  |
| H | -1.83658 | 1.65516  | 1.16895  |
| H | 0.37232  | -1.64314 | -0.54425 |
| H | -0.90526 | 0.53184  | -0.863   |
| H | 4.7775   | -0.66602 | 0.15514  |
| C | -2.06911 | -0.90298 | 0.18885  |
| H | -2.07288 | -1.63896 | -0.6209  |
| H | -2.12667 | -1.41133 | 1.157    |
| O | -3.30564 | -0.1627  | 0.10514  |
| O | -3.47298 | 0.32636  | -1.09186 |

#### r16

|   |          |          |          |
|---|----------|----------|----------|
| C | 1.23664  | -0.77367 | -0.77596 |
| C | 0.34445  | 0.29586  | -0.17582 |
| O | 1.51797  | -1.7951  | 0.21952  |
| O | 1.91048  | -1.26811 | 1.3421   |
| H | 0.74939  | -1.31673 | -1.58642 |
| H | 2.1991   | -0.37286 | -1.10334 |
| H | 0.52489  | 0.2667   | 0.90476  |
| C | -1.10873 | -0.1112  | -0.29275 |
| O | -1.51569 | -1.1403  | -0.77415 |
| O | -1.89606 | 0.78049  | 0.32595  |
| C | -3.26598 | 0.39915  | 0.44283  |
| H | -3.71377 | 0.26961  | -0.54426 |
| H | -3.34906 | -0.54042 | 0.99322  |
| H | -3.755   | 1.20684  | 0.98403  |
| C | 0.70818  | 1.72619  | -0.59895 |
| H | 0.7726   | 1.80306  | -1.69069 |
| H | -0.09287 | 2.39653  | -0.27699 |
| C | 2.02686  | 2.1466   | 0.05391  |
| H | 2.86121  | 1.51277  | -0.25919 |
| H | 2.282    | 3.17809  | -0.19929 |
| H | 1.95386  | 2.0701   | 1.14268  |

#### r17

|   |          |          |          |
|---|----------|----------|----------|
| C | 0.48761  | 0.30749  | 0.54308  |
| C | -0.92365 | -0.26082 | 0.54823  |
| O | -1.28074 | -1.05729 | 1.37991  |
| O | -1.66934 | 0.1627   | -0.46955 |
| C | -2.9881  | -0.38948 | -0.51095 |
| H | -2.93863 | -1.47588 | -0.61087 |
| H | -3.52918 | -0.14191 | 0.40402  |
| H | 0.68498  | 0.71763  | 1.53818  |
| O | 0.62633  | 1.38078  | -0.40437 |
| O | -0.01848 | 2.44267  | -0.00507 |
| C | 2.92603  | -0.22416 | 0.26916  |
| H | 3.6537   | -1.01588 | 0.07429  |
| H | 3.07908  | 0.56877  | -0.46801 |
| H | 3.1296   | 0.18864  | 1.26163  |
| H | -3.46828 | 0.05845  | -1.37816 |
| C | 1.50411  | -0.77706 | 0.17715  |
| H | 1.36818  | -1.5601  | 0.93211  |
| C | 1.21399  | -1.3617  | -1.20704 |
| H | 1.95442  | -2.12681 | -1.45353 |
| H | 0.22468  | -1.82705 | -1.25162 |

H 1.25939 -0.58241 -1.97314

r18

C -0.34458 0.30937 -0.07686  
C 1.03729 -0.28841 0.05892  
O 1.28711 -1.32315 0.61942  
O 1.96719 0.48778 -0.50739  
C 3.31326 0.01462 -0.40334  
H 3.60394 -0.06842 0.64414  
C -0.44365 1.61707 0.71786  
H 0.27356 2.34634 0.34235  
H -1.44734 2.0336 0.62645  
H -0.2399 1.43869 1.77693  
H 3.40763 -0.96166 -0.87904  
H 3.92447 0.75296 -0.91471  
O -2.70188 -0.20778 0.2082  
O -3.00622 -0.09027 -1.04839  
C -1.36365 -0.72187 0.38478  
H -1.28202 -0.92206 1.45308  
H -1.28633 -1.65409 -0.17478  
C -0.58546 0.60189 -1.56951  
H -0.78645 -0.31419 -2.08458  
H -1.42233 1.2605 -1.67336  
H 0.28504 1.06261 -1.98768

r19

C -0.03309 -0.14022 0.13206  
C 1.4029 0.31313 -0.05187  
O 1.79229 1.45394 0.01259  
O 2.21896 -0.72749 -0.28932  
C 3.5951 -0.38578 -0.45372  
H 3.71814 0.30798 -1.28791  
C -0.93202 1.09545 0.19822  
H -0.63005 1.71278 1.052  
C -0.13938 -1.04297 1.36854  
H -1.13106 -1.49596 1.41908  
H 0.59946 -1.84442 1.31705  
H 3.98207 0.08437 0.45295  
C -2.41257 0.79003 0.33907  
H -2.64786 0.19667 1.22511  
H -3.00246 1.70937 0.34086  
H 0.03624 -0.46732 2.28362  
H -0.28955 -0.74071 -0.74888  
H -0.77545 1.70988 -0.69367  
O -2.89417 0.0519 -0.80766  
O -2.72437 -1.23186 -0.65339  
H 4.11322 -1.32229 -0.65183

r20

C 0.44996 0.60589 0.00274  
O 1.2255 1.45209 0.3663  
O 0.75884 -0.65971 -0.25904  
C 2.13356 -0.99546 -0.04659  
H 2.77163 -0.40447 -0.70639  
H 2.41255 -0.79669 0.98966  
O -1.82175 -0.2345 -0.46664  
O -1.94943 -0.92589 0.63425  
H 2.21615 -2.05587 -0.27388  
C -1.01687 0.92229 -0.23822  
H -1.10436 1.5336 -1.13932  
H -1.40105 1.47123 0.62338

## r21

|   |          |          |          |
|---|----------|----------|----------|
| C | -1.23203 | 0.15144  | -0.02819 |
| O | -1.20041 | 1.28475  | -0.41939 |
| O | -0.19188 | -0.428   | 0.6476   |
| C | 0.94356  | 0.37254  | 0.80584  |
| H | 0.68166  | 1.41813  | 0.96743  |
| H | 1.53855  | -0.06786 | 1.60376  |
| C | -2.36163 | -0.82323 | -0.18573 |
| H | -2.01983 | -1.67798 | -0.77374 |
| H | -2.66754 | -1.19604 | 0.79388  |
| H | -3.19336 | -0.3305  | -0.68444 |
| O | 1.72087  | 0.36557  | -0.39583 |
| O | 2.36655  | -0.76609 | -0.51467 |

## r22

|   |          |          |          |
|---|----------|----------|----------|
| C | -1.24425 | 0.15072  | -0.03028 |
| O | -1.23278 | 1.27484  | -0.43229 |
| O | -0.19078 | -0.40141 | 0.64871  |
| C | 0.9439   | 0.40152  | 0.79023  |
| H | 0.68572  | 1.45172  | 0.91075  |
| H | 1.52962  | -0.01234 | 1.60677  |
| C | -2.35351 | -0.84528 | -0.1718  |
| H | -1.99426 | -1.69922 | -0.74822 |
| H | -2.64807 | -1.20976 | 0.81288  |
| O | 1.73158  | 0.35021  | -0.40524 |
| O | 2.38515  | -0.77302 | -0.49075 |
| C | -3.54662 | -0.18172 | -0.88439 |
| H | -4.34881 | -0.88497 | -0.96693 |
| H | -3.87262 | 0.66652  | -0.31948 |
| H | -3.24739 | 0.13435  | -1.86187 |

## r23

|   |          |          |          |
|---|----------|----------|----------|
| C | -0.18517 | 0.38655  | 0.16419  |
| O | -0.07221 | 1.41226  | -0.44896 |
| O | 0.86285  | -0.20684 | 0.81427  |
| C | 2.10073  | 0.42544  | 0.6691   |
| H | 2.00078  | 1.5104   | 0.63969  |
| H | 2.74526  | 0.05796  | 1.46559  |
| C | -1.44426 | -0.41722 | 0.34074  |
| H | -1.25627 | -1.41443 | -0.07564 |
| H | -1.59753 | -0.56867 | 1.41595  |
| O | 2.68865  | 0.07506  | -0.58822 |
| O | 3.10246  | -1.16581 | -0.56491 |
| C | -2.65199 | 0.24217  | -0.31326 |
| H | -2.78724 | 1.24106  | 0.11334  |
| H | -2.44211 | 0.39325  | -1.37653 |
| C | -3.91721 | -0.58999 | -0.13188 |
| H | -4.15067 | -0.72715 | 0.92856  |
| H | -4.77634 | -0.10852 | -0.60422 |
| H | -3.80253 | -1.58293 | -0.57756 |

## r24

|   |          |          |          |
|---|----------|----------|----------|
| C | 0.35309  | 0.35677  | 0.24651  |
| O | 0.41728  | 1.41641  | -0.31376 |
| O | 1.44532  | -0.25552 | 0.79951  |
| C | 2.66344  | 0.40699  | 0.62179  |
| H | 2.54224  | 1.48971  | 0.65027  |
| H | 3.35543  | 0.01475  | 1.3645   |
| C | -0.88318 | -0.47573 | 0.44936  |
| H | -0.70896 | -1.44145 | -0.04088 |
| H | -0.96659 | -0.69715 | 1.51995  |

|   |          |          |          |
|---|----------|----------|----------|
| O | 3.19046  | 0.1257   | -0.67889 |
| O | 3.67853  | -1.08773 | -0.71782 |
| C | -2.13576 | 0.20464  | -0.08628 |
| H | -2.26254 | 1.17208  | 0.41324  |
| H | -1.99498 | 0.43067  | -1.14921 |
| C | -3.38615 | -0.64926 | 0.1058   |
| H | -3.51279 | -0.87555 | 1.17208  |
| H | -3.24807 | -1.61399 | -0.39842 |
| C | -4.64037 | 0.03642  | -0.42781 |
| H | -4.54284 | 0.24897  | -1.49674 |
| H | -5.52775 | -0.58577 | -0.28807 |
| H | -4.8122  | 0.9879   | 0.08473  |

r25

|   |          |          |          |
|---|----------|----------|----------|
| C | -0.10227 | -0.24631 | 0.01893  |
| O | -0.16693 | -1.08657 | -0.837   |
| O | -1.16201 | 0.06372  | 0.82677  |
| C | -2.34966 | -0.62129 | 0.55353  |
| H | -2.16235 | -1.65453 | 0.26109  |
| H | -2.98979 | -0.51414 | 1.42747  |
| C | 1.08736  | 0.61384  | 0.35248  |
| H | 0.82209  | 1.63632  | 0.05393  |
| H | 1.19901  | 0.63849  | 1.44327  |
| O | -3.0124  | -0.03384 | -0.57077 |
| O | -3.53328 | 1.11947  | -0.23813 |
| C | 2.37583  | 0.15461  | -0.32914 |
| H | 2.15999  | 0.03771  | -1.39779 |
| C | 3.4625   | 1.21406  | -0.15091 |
| H | 3.68094  | 1.36709  | 0.91218  |
| H | 4.39024  | 0.90509  | -0.6401  |
| H | 3.15959  | 2.17651  | -0.5742  |
| C | 2.83613  | -1.196   | 0.21946  |
| H | 3.04975  | -1.11934 | 1.29213  |
| H | 2.07584  | -1.96576 | 0.06896  |
| H | 3.7523   | -1.5231  | -0.27997 |

r26

|   |          |          |          |
|---|----------|----------|----------|
| C | 0.42071  | -0.64722 | -0.07397 |
| O | 0.33025  | -1.39817 | 0.85563  |
| O | -0.62161 | -0.39793 | -0.93963 |
| C | -1.89    | -0.73258 | -0.48837 |
| H | -2.50984 | -1.02503 | -1.33431 |
| H | -1.84841 | -1.4847  | 0.30076  |
| C | 1.63254  | 0.15785  | -0.47254 |
| H | 1.76397  | 0.01939  | -1.55244 |
| O | -2.53018 | 0.45016  | 0.04021  |
| O | -1.78164 | 1.00103  | 0.95502  |
| C | 2.86226  | -0.32588 | 0.28525  |
| H | 3.73802  | 0.25777  | -0.00829 |
| H | 2.71006  | -0.21101 | 1.36132  |
| H | 3.0629   | -1.38123 | 0.0883   |
| C | 1.32968  | 1.64093  | -0.20666 |
| H | 2.17981  | 2.25296  | -0.51752 |
| H | 0.44084  | 1.96625  | -0.75068 |
| H | 1.15695  | 1.80628  | 0.86076  |

r27

|   |          |          |          |
|---|----------|----------|----------|
| C | -0.00532 | -0.16798 | -0.41114 |
| O | 0.15987  | -1.12677 | -1.11494 |
| O | 1.00813  | 0.70366  | -0.10963 |
| C | 2.26195  | 0.37856  | -0.63427 |
| H | 2.18174  | -0.08011 | -1.61954 |

|   |          |          |          |
|---|----------|----------|----------|
| H | 2.86565  | 1.28397  | -0.6112  |
| C | -1.29877 | 0.25979  | 0.24476  |
| H | -1.08417 | 0.31559  | 1.32109  |
| O | 2.89646  | -0.60994 | 0.18379  |
| O | 3.2982   | -0.07576 | 1.30855  |
| C | -2.3809  | -0.79123 | -0.01029 |
| H | -2.54418 | -0.87005 | -1.09109 |
| H | -2.00188 | -1.76686 | 0.30915  |
| C | -1.68912 | 1.6649   | -0.23508 |
| H | -2.56125 | 2.02307  | 0.31509  |
| H | -0.87394 | 2.37347  | -0.08071 |
| H | -1.94217 | 1.64782  | -1.30011 |
| C | -3.69391 | -0.48298 | 0.70381  |
| H | -4.16447 | 0.42391  | 0.31496  |
| H | -4.40476 | -1.30233 | 0.57507  |
| H | -3.53536 | -0.3444  | 1.7785   |

#### r28

|   |          |          |          |
|---|----------|----------|----------|
| C | -0.21107 | -0.6122  | -0.2347  |
| O | 0.01466  | -1.25511 | -1.22131 |
| O | 0.70343  | -0.47707 | 0.78675  |
| C | 2.01917  | -0.79968 | 0.48635  |
| H | 2.50087  | -1.2154  | 1.37036  |
| H | 2.08181  | -1.44755 | -0.38865 |
| C | -1.4807  | 0.15893  | 0.07448  |
| O | 2.75021  | 0.41471  | 0.21257  |
| O | 2.17049  | 1.08803  | -0.74224 |
| C | -2.52749 | -0.18332 | -0.98384 |
| H | -3.43877 | 0.39196  | -0.79699 |
| H | -2.16051 | 0.0515   | -1.98527 |
| H | -2.7766  | -1.24751 | -0.9592  |
| C | -1.11829 | 1.65327  | 0.01376  |
| H | -2.00888 | 2.24943  | 0.23427  |
| H | -0.34174 | 1.89798  | 0.74256  |
| H | -0.75497 | 1.92715  | -0.98076 |
| C | -1.98781 | -0.20196 | 1.47743  |
| H | -2.90628 | 0.3564   | 1.68124  |
| H | -2.21705 | -1.26928 | 1.55272  |
| H | -1.25108 | 0.05061  | 2.24255  |

#### TS1

|   |          |          |          |
|---|----------|----------|----------|
| C | -0.77177 | 0.52235  | -0.19653 |
| C | -1.33535 | 0.62741  | 1.21809  |
| H | -1.10042 | 1.36361  | -0.81422 |
| H | -0.887   | -0.05509 | 1.93953  |
| C | 0.74717  | 0.46268  | -0.2333  |
| O | 1.43887  | 1.37805  | -0.59799 |
| O | 1.2041   | -0.69765 | 0.23981  |
| C | 2.62941  | -0.81472 | 0.25911  |
| H | 3.06265  | -0.04607 | 0.90248  |
| H | 2.83896  | -1.80887 | 0.64796  |
| H | 3.03094  | -0.7     | -0.74934 |
| O | -1.30928 | -0.70813 | -0.66801 |
| O | -2.65196 | -0.61271 | -0.29303 |
| H | -2.43133 | -0.02964 | 0.74181  |
| H | -1.58435 | 1.61325  | 1.60129  |

#### TS2

|   |         |         |         |
|---|---------|---------|---------|
| C | 1.27991 | 0.30625 | 0.30071 |
| C | 2.57139 | 1.0778  | 0.05429 |



|   |          |          |          |
|---|----------|----------|----------|
| H | 1.19055  | 0.03174  | 1.35803  |
| H | 2.66107  | 1.54178  | -0.92897 |
| C | 0.01162  | 0.98141  | -0.18393 |
| O | 2.76727  | -1.2562  | -0.17771 |
| O | 1.46015  | -0.87076 | -0.48896 |
| H | 3.18829  | -0.12873 | -0.07042 |
| H | 2.99151  | 1.65934  | 0.87142  |
| H | -0.0585  | 1.98249  | 0.25665  |
| H | 0.02852  | 1.09117  | -1.27063 |
| C | -1.21758 | 0.208    | 0.24839  |
| O | -1.31442 | -0.39633 | 1.28636  |
| O | -2.20137 | 0.30498  | -0.65456 |
| C | -3.40736 | -0.37521 | -0.29919 |
| H | -4.09872 | -0.20462 | -1.12207 |
| H | -3.21436 | -1.44189 | -0.17018 |
| H | -3.80928 | 0.02569  | 0.63347  |

#### TS3

|   |          |          |          |
|---|----------|----------|----------|
| C | 1.94425  | 0.21576  | 0.41704  |
| C | 3.08845  | 1.16589  | 0.07855  |
| H | 2.01006  | -0.07284 | 1.47602  |
| H | 3.01425  | 1.65431  | -0.89405 |
| O | -2.14803 | 1.27171  | -0.39444 |
| O | -2.82129 | -0.78466 | 0.20557  |
| C | -4.16042 | -0.3793  | -0.07841 |
| H | -4.25987 | -0.10489 | -1.13083 |
| H | -4.78738 | -1.23762 | 0.15549  |
| H | -4.4373  | 0.48028  | 0.53532  |
| O | 2.22771  | -0.92432 | -0.39757 |
| O | 3.60205  | -1.11151 | -0.21425 |
| H | 3.85845  | 0.07136  | -0.12987 |
| H | 3.49453  | 1.79164  | 0.86974  |
| C | -1.89076 | 0.16024  | -0.00238 |
| C | -0.50806 | -0.35153 | 0.32058  |
| H | -0.50386 | -0.67773 | 1.36719  |
| H | -0.32029 | -1.24939 | -0.2768  |
| C | 0.55562  | 0.70945  | 0.06182  |
| H | 0.33434  | 1.61045  | 0.64281  |
| H | 0.53904  | 1.00162  | -0.99278 |

#### TS4

|   |          |          |          |
|---|----------|----------|----------|
| C | 1.25052  | 0.10955  | 0.23306  |
| C | 2.63236  | 0.50883  | -0.273   |
| H | 1.20045  | 0.21321  | 1.32513  |
| H | 2.71842  | 0.63575  | -1.35346 |
| C | 0.07283  | 0.83055  | -0.41517 |
| O | 2.40961  | -1.77442 | 0.25326  |
| O | 1.16196  | -1.26934 | -0.12741 |
| H | 3.02023  | -0.7683  | -0.03088 |
| H | 3.21981  | 1.20939  | 0.31538  |
| H | 0.09658  | 0.63424  | -1.49096 |
| C | -1.20277 | 0.24819  | 0.16762  |
| O | -1.51617 | 0.35484  | 1.32821  |
| O | -1.9327  | -0.3969  | -0.74786 |
| C | -3.12256 | -1.00636 | -0.24248 |
| H | -3.60127 | -1.47793 | -1.09836 |
| H | -2.87054 | -1.74877 | 0.51726  |
| H | -3.77634 | -0.2531  | 0.20175  |
| C | 0.13249  | 2.33069  | -0.12012 |
| H | 0.0642   | 2.49978  | 0.95741  |
| H | 1.06685  | 2.76086  | -0.49051 |
| H | -0.69714 | 2.85257  | -0.60182 |

## TS5

|   |          |          |          |
|---|----------|----------|----------|
| C | 0.65925  | 0.11719  | 0.23274  |
| C | 1.54139  | 1.30998  | -0.12699 |
| H | 1.21736  | 1.89017  | -0.98885 |
| C | -0.81694 | 0.40441  | -0.02459 |
| O | -1.26484 | 1.50507  | -0.22622 |
| O | -1.54532 | -0.71108 | 0.03107  |
| C | -2.94303 | -0.53034 | -0.2122  |
| H | -3.10025 | -0.11572 | -1.20968 |
| H | -3.38835 | -1.51948 | -0.13037 |
| H | -3.3698  | 0.151    | 0.52637  |
| O | 1.04471  | -0.87954 | -0.72825 |
| O | 2.44288  | -0.76324 | -0.75773 |
| H | 2.46213  | 0.43483  | -0.58225 |
| H | 1.95428  | 1.89731  | 0.68989  |
| C | 0.88671  | -0.37647 | 1.65628  |
| H | 0.29433  | -1.27596 | 1.83069  |
| H | 1.94579  | -0.61168 | 1.7812   |
| H | 0.60083  | 0.39113  | 2.38057  |

## TS6

|   |          |          |          |
|---|----------|----------|----------|
| C | 0.41193  | -0.15223 | -0.16773 |
| C | 1.09335  | -1.27488 | -0.94669 |
| H | 0.49885  | -2.17621 | -1.08069 |
| C | -1.10591 | -0.22161 | -0.33025 |
| O | -1.6638  | -0.85035 | -1.19463 |
| O | -1.72927 | 0.52619  | 0.58064  |
| C | -3.15696 | 0.50733  | 0.50178  |
| H | -3.5268  | -0.51394 | 0.61024  |
| H | -3.50646 | 1.13332  | 1.32002  |
| H | -3.48772 | 0.90431  | -0.46005 |
| O | 0.67052  | -0.4739  | 1.21201  |
| O | 1.96753  | -1.0139  | 1.20863  |
| H | 1.90587  | -1.48492 | 0.09513  |
| H | 1.68946  | -0.99633 | -1.81256 |
| C | 0.8996   | 1.25282  | -0.54132 |
| H | 0.31818  | 1.96302  | 0.05453  |
| H | 0.63783  | 1.42283  | -1.59345 |
| C | 2.39132  | 1.48645  | -0.31653 |
| H | 3.00741  | 0.78516  | -0.88669 |
| H | 2.65767  | 2.49775  | -0.63328 |
| H | 2.64599  | 1.37343  | 0.73801  |

## TS7

|   |          |          |          |
|---|----------|----------|----------|
| C | -1.1692  | 0.28182  | 0.18157  |
| C | -2.44104 | 0.09566  | 1.0158   |
| H | -2.31921 | -0.44797 | 1.95329  |
| C | 0.06604  | 0.56724  | 1.04366  |
| O | -2.24861 | -1.42309 | -0.76948 |
| O | -0.96807 | -1.04069 | -0.35158 |
| H | -2.82755 | -0.84498 | 0.12421  |
| H | -3.1517  | 0.9186   | 1.05697  |
| H | -0.0118  | 1.58333  | 1.43985  |
| H | 0.10692  | -0.1476  | 1.86715  |
| C | 1.34313  | 0.47586  | 0.2335   |
| O | 1.69656  | 1.28155  | -0.59282 |
| O | 2.03704  | -0.62729 | 0.5365   |
| C | 3.22649  | -0.81533 | -0.23169 |
| H | 3.66213  | -1.74833 | 0.12015  |
| H | 2.98249  | -0.8784  | -1.2939  |
| H | 3.91564  | 0.01738  | -0.0759  |

|   |          |         |          |
|---|----------|---------|----------|
| C | -1.38638 | 1.29426 | -0.93506 |
| H | -1.5797  | 2.28545 | -0.51549 |
| H | -0.50132 | 1.35397 | -1.56878 |
| H | -2.24549 | 0.98761 | -1.53519 |

#### TS8

|   |          |          |          |
|---|----------|----------|----------|
| C | 1.68956  | 0.64619  | 0.66711  |
| C | 0.47109  | -0.25291 | 0.83348  |
| O | 2.23709  | 0.27284  | -0.60075 |
| O | 2.16957  | -1.10248 | -0.59101 |
| H | 1.44038  | 1.70632  | 0.58948  |
| H | 2.41143  | 0.45829  | 1.46792  |
| H | 1.13716  | -1.15523 | 0.00899  |
| C | -0.76498 | 0.21762  | 0.16337  |
| O | -0.84161 | 1.23493  | -0.48591 |
| O | -1.78557 | -0.63384 | 0.34793  |
| C | -3.00078 | -0.25807 | -0.30161 |
| H | -3.35407 | 0.70286  | 0.07836  |
| H | -2.84525 | -0.1747  | -1.37919 |
| H | 0.32048  | -0.77903 | 1.77365  |
| H | -3.71533 | -1.0471  | -0.07533 |

#### TS9

|   |          |          |          |
|---|----------|----------|----------|
| C | -2.50389 | -0.69562 | 0.45143  |
| C | -1.11033 | -0.1895  | 0.80968  |
| O | -2.74297 | -0.09138 | -0.81432 |
| O | -2.36689 | 1.23709  | -0.58744 |
| H | -2.57852 | -1.77876 | 0.30569  |
| H | -3.24057 | -0.35756 | 1.18814  |
| H | -1.4501  | 0.95289  | 0.18963  |
| H | -0.89046 | 0.02672  | 1.85372  |
| C | 0.01768  | -0.78482 | 0.01687  |
| H | -0.23628 | -0.808   | -1.0495  |
| H | 0.20261  | -1.82958 | 0.30658  |
| C | 1.30496  | -0.01476 | 0.20066  |
| O | 1.43224  | 0.96239  | 0.89506  |
| O | 2.30224  | -0.56058 | -0.50914 |
| C | 3.55637  | 0.11565  | -0.40027 |
| H | 3.89626  | 0.12125  | 0.63736  |
| H | 4.24894  | -0.43992 | -1.02954 |
| H | 3.4625   | 1.14716  | -0.74558 |

#### TS10

|   |          |          |          |
|---|----------|----------|----------|
| C | -3.10917 | -0.75027 | 0.20312  |
| C | -1.82998 | -0.24886 | 0.87112  |
| O | -3.24208 | 0.10725  | -0.92376 |
| O | -3.02843 | 1.37274  | -0.36864 |
| H | -3.04717 | -1.77327 | -0.18312 |
| H | -3.96831 | -0.6449  | 0.87484  |
| H | -2.19441 | 0.9768   | 0.44928  |
| C | 1.92648  | -0.16441 | 0.01129  |
| O | 2.09366  | -1.18509 | -0.60855 |
| O | 2.90482  | 0.7204   | 0.25995  |
| C | 4.1823   | 0.36675  | -0.27105 |
| H | 4.52389  | -0.57934 | 0.15424  |
| H | 4.12724  | 0.2636   | -1.35673 |
| H | -1.80561 | -0.25795 | 1.96241  |
| H | 4.85426  | 1.17725  | 0.00493  |
| C | 0.61742  | 0.28379  | 0.61738  |
| H | 0.73948  | 0.27616  | 1.70762  |
| H | 0.44528  | 1.32829  | 0.33732  |

|   |          |          |          |
|---|----------|----------|----------|
| C | -0.5419  | -0.60402 | 0.18294  |
| H | -0.68164 | -0.53347 | -0.90149 |
| H | -0.28763 | -1.65353 | 0.38995  |

#### TS11

|   |          |          |          |
|---|----------|----------|----------|
| C | -1.27576 | 0.00548  | -0.64387 |
| C | -0.33354 | 0.8449   | 0.22673  |
| O | -1.41931 | -1.2183  | 0.10002  |
| O | -1.58418 | -0.79214 | 1.40281  |
| H | -0.83386 | 0.14424  | 1.30404  |
| H | -0.81287 | -0.30026 | -1.58672 |
| H | -0.58411 | 1.89023  | 0.39629  |
| C | -2.61477 | 0.69215  | -0.85356 |
| H | -3.2862  | 0.03763  | -1.41227 |
| H | -3.06851 | 0.91818  | 0.11441  |
| H | -2.48707 | 1.62318  | -1.41137 |
| C | 1.13195  | 0.61971  | 0.1643   |
| O | 1.95604  | 1.37667  | 0.62227  |
| O | 1.43692  | -0.54401 | -0.43304 |
| C | 2.83153  | -0.84637 | -0.47363 |
| H | 2.91259  | -1.80926 | -0.97403 |
| H | 3.37211  | -0.07475 | -1.02584 |
| H | 3.23576  | -0.90225 | 0.53913  |

#### TS12

|   |          |          |          |
|---|----------|----------|----------|
| C | -1.56818 | 0.53455  | -0.32756 |
| C | -0.83441 | -0.16679 | 0.82203  |
| O | -2.18975 | -0.56933 | -0.99965 |
| O | -2.75197 | -1.30668 | 0.04977  |
| H | -1.85335 | -1.0502  | 0.83974  |
| H | -0.87363 | 0.96716  | -1.0561  |
| H | -0.77857 | 0.37286  | 1.76761  |
| C | 1.55509  | 0.01143  | 0.14377  |
| C | 0.402    | -0.93073 | 0.43607  |
| H | 0.72146  | -1.63162 | 1.2124   |
| H | 0.21     | -1.51806 | -0.47036 |
| O | 1.46488  | 1.21249  | 0.06064  |
| O | 2.70156  | -0.66002 | -0.02229 |
| C | 3.8361   | 0.15321  | -0.33061 |
| H | 4.00209  | 0.88882  | 0.45859  |
| H | 4.67949  | -0.5303  | -0.40603 |
| H | 3.68003  | 0.67835  | -1.2752  |
| C | -2.57567 | 1.56009  | 0.15618  |
| H | -3.13986 | 1.95822  | -0.68947 |
| H | -3.27441 | 1.09745  | 0.8569   |
| H | -2.06061 | 2.38508  | 0.65489  |

#### TS13

|   |          |          |          |
|---|----------|----------|----------|
| C | -1.262   | 0.23854  | 0.51842  |
| O | -1.47233 | 1.04493  | -0.64898 |
| O | -0.8743  | 2.24292  | -0.32349 |
| H | -1.86411 | 0.65024  | 1.3409   |
| H | 0.01971  | 1.7472   | 0.31407  |
| C | -1.68349 | -1.18501 | 0.20004  |
| H | -1.12518 | -1.51707 | -0.67736 |
| H | -1.38059 | -1.8191  | 1.04162  |
| C | 0.21124  | 0.49354  | 0.86141  |
| H | 0.47594  | 0.62643  | 1.9083   |
| C | 1.2621   | -0.15852 | 0.04218  |
| O | 1.08222  | -0.75268 | -0.99585 |
| O | 2.4785   | 0.03198  | 0.58424  |
| C | 3.55988  | -0.5035  | -0.17837 |

|   |          |          |          |
|---|----------|----------|----------|
| H | 4.46443  | -0.25548 | 0.37354  |
| H | 3.45457  | -1.58577 | -0.28078 |
| H | 3.58029  | -0.05769 | -1.17519 |
| C | -3.19033 | -1.28474 | -0.02855 |
| H | -3.49337 | -0.65642 | -0.86952 |
| H | -3.4821  | -2.31388 | -0.24896 |
| H | -3.74675 | -0.95749 | 0.85531  |

#### TS14

|   |          |          |          |
|---|----------|----------|----------|
| C | -0.98102 | -0.36643 | -0.07127 |
| C | -2.31296 | -0.31696 | 0.68388  |
| O | -1.08506 | 0.75518  | -0.95312 |
| O | -1.55657 | 1.77412  | -0.11369 |
| H | -2.25168 | 1.01413  | 0.57422  |
| H | -0.87313 | -1.24042 | -0.72369 |
| H | -2.28607 | -0.59251 | 1.73945  |
| C | -3.51615 | -0.77818 | -0.08922 |
| H | -4.44851 | -0.50427 | 0.4088   |
| H | -3.50504 | -0.34399 | -1.09276 |
| H | -3.50282 | -1.87108 | -0.19629 |
| C | 1.50797  | -0.36437 | 0.04773  |
| O | 1.62145  | -0.995   | -0.97386 |
| O | 2.5207   | 0.28588  | 0.63591  |
| C | 3.77205  | 0.18692  | -0.0464  |
| H | 4.47829  | 0.76928  | 0.54224  |
| H | 4.0895   | -0.85599 | -0.1107  |
| H | 3.68406  | 0.59132  | -1.05655 |
| C | 0.22739  | -0.23293 | 0.84107  |
| H | 0.22284  | -1.02465 | 1.59945  |
| H | 0.20475  | 0.72841  | 1.35921  |

#### TS15

|   |          |          |          |
|---|----------|----------|----------|
| C | -0.52623 | -0.06071 | -0.57671 |
| C | -1.61708 | -0.66694 | 0.3049   |
| O | -0.73263 | 1.33453  | -0.45051 |
| O | -0.85846 | 1.48131  | 0.93986  |
| H | -1.4573  | 0.39779  | 1.09499  |
| H | -0.62637 | -0.30119 | -1.64357 |
| H | -1.33155 | -1.56618 | 0.84792  |
| C | -3.00988 | -0.61431 | -0.25459 |
| H | -3.75802 | -0.82959 | 0.51086  |
| H | -3.21289 | 0.37047  | -0.6845  |
| H | -3.12563 | -1.36191 | -1.05074 |
| C | 0.86255  | -0.48441 | -0.09809 |
| O | 1.08827  | -1.5315  | 0.45681  |
| O | 1.78562  | 0.42125  | -0.40886 |
| C | 3.11207  | 0.09134  | 0.0083   |
| H | 3.44373  | -0.83028 | -0.47478 |
| H | 3.73408  | 0.93167  | -0.29236 |
| H | 3.14291  | -0.04538 | 1.09086  |

#### TS16

|   |         |          |          |
|---|---------|----------|----------|
| C | 0.0401  | 0.09214  | 0.67549  |
| C | 1.24601 | -0.48049 | -0.06507 |
| O | 0.13947 | 1.48649  | 0.44591  |
| O | 0.37426 | 1.53704  | -0.93771 |
| H | 1.0685  | 0.49968  | -0.95392 |
| H | 0.072   | -0.05282 | 1.76359  |
| H | 1.08798 | -1.44243 | -0.55268 |
| C | 2.58717 | -0.26005 | 0.57805  |
| H | 2.61968 | 0.75456  | 0.99175  |
| H | 2.67516 | -0.94949 | 1.43212  |

|   |          |          |          |
|---|----------|----------|----------|
| C | -1.26444 | -0.49368 | 0.13451  |
| O | -1.35565 | -1.60187 | -0.33383 |
| O | -2.28296 | 0.3479   | 0.2876   |
| C | -3.53848 | -0.13967 | -0.19057 |
| H | -3.82156 | -1.04776 | 0.34577  |
| H | -4.2554  | 0.65776  | -0.00719 |
| H | -3.47336 | -0.36379 | -1.25695 |
| C | 3.74685  | -0.48385 | -0.38939 |
| H | 4.70851  | -0.35337 | 0.11131  |
| H | 3.71721  | -1.49336 | -0.80973 |
| H | 3.69709  | 0.22806  | -1.21805 |

#### TS17

|   |          |          |          |
|---|----------|----------|----------|
| C | 0.48206  | -0.21023 | 0.29785  |
| C | 1.52853  | -0.20678 | -0.82501 |
| O | 0.655    | 1.07006  | 0.89325  |
| O | 0.68887  | 1.91825  | -0.2244  |
| H | 1.28317  | 1.0955   | -0.95071 |
| H | 1.22943  | -0.72419 | -1.73515 |
| C | 2.96412  | -0.34707 | -0.40503 |
| H | 3.63899  | -0.0822  | -1.22159 |
| H | 3.1809   | 0.29265  | 0.45536  |
| H | 3.18397  | -1.38517 | -0.1219  |
| C | -0.91915 | -0.32718 | -0.31738 |
| O | -1.15533 | -0.87057 | -1.36843 |
| O | -1.84672 | 0.1933   | 0.48483  |
| C | -3.18305 | 0.11153  | -0.01355 |
| H | -3.47255 | -0.93184 | -0.15658 |
| H | -3.8095  | 0.58759  | 0.73793  |
| H | -3.26027 | 0.6338   | -0.96905 |
| C | 0.65917  | -1.25925 | 1.3849   |
| H | -0.11477 | -1.13368 | 2.14504  |
| H | 0.57654  | -2.25934 | 0.95194  |
| H | 1.63949  | -1.14763 | 1.85192  |

#### TS18

|   |          |          |          |
|---|----------|----------|----------|
| C | 1.40146  | 0.29705  | 0.16158  |
| O | 1.62155  | -0.45283 | -1.05434 |
| O | 1.32794  | -1.75431 | -0.70363 |
| H | 0.45053  | -1.46599 | 0.067    |
| C | 1.3719   | 1.7623   | -0.23998 |
| H | 2.36587  | 2.06582  | -0.57901 |
| H | 0.64472  | 1.92449  | -1.0339  |
| H | 1.10427  | 2.37377  | 0.62632  |
| C | 0.06827  | -0.28749 | 0.67121  |
| H | -0.02423 | -0.47157 | 1.74021  |
| C | -1.20503 | 0.09197  | 0.01127  |
| O | -1.3145  | 0.67014  | -1.04523 |
| O | -2.25947 | -0.33545 | 0.731    |
| C | -3.53012 | -0.06433 | 0.14012  |
| H | -4.27032 | -0.46761 | 0.82849  |
| H | -3.66796 | 1.01146  | 0.01136  |
| H | -3.60696 | -0.54622 | -0.83693 |
| C | 2.504    | -0.0032  | 1.17236  |
| H | 3.46907  | 0.29644  | 0.75741  |
| H | 2.33312  | 0.55223  | 2.09842  |
| H | 2.53489  | -1.07106 | 1.39876  |

#### TS19

|   |         |          |          |
|---|---------|----------|----------|
| C | 1.67307 | -0.06455 | -0.83583 |
| C | 0.47791 | 0.60489  | -0.14808 |
| O | 2.0872  | -1.06993 | 0.08355  |

|   |          |          |          |
|---|----------|----------|----------|
| O | 2.05696  | -0.41786 | 1.30099  |
| H | 1.41726  | -0.5773  | -1.76541 |
| H | 2.46904  | 0.67387  | -0.98628 |
| H | 1.05104  | 0.23567  | 1.02462  |
| C | -0.78172 | -0.18932 | -0.25886 |
| O | -0.8788  | -1.23114 | -0.86345 |
| O | -1.79658 | 0.37693  | 0.41512  |
| C | -3.01845 | -0.36233 | 0.38587  |
| H | -3.37123 | -0.4743  | -0.64141 |
| H | -2.87101 | -1.35435 | 0.81749  |
| H | -3.72809 | 0.21374  | 0.97662  |
| C | 0.36277  | 2.1039   | -0.19057 |
| H | 0.12537  | 2.44745  | -1.20594 |
| H | -0.43272 | 2.45022  | 0.47062  |
| H | 1.30866  | 2.56548  | 0.10486  |

#### TS20

|   |          |          |          |
|---|----------|----------|----------|
| C | 2.42614  | 0.08131  | -0.68245 |
| C | 1.08792  | 0.59874  | -0.14508 |
| O | 2.45109  | -1.26548 | -0.23843 |
| O | 2.0843   | -1.14456 | 1.10651  |
| H | 2.50983  | 0.06397  | -1.77511 |
| H | 3.2545   | 0.65209  | -0.24477 |
| H | 1.28752  | -0.19575 | 0.90302  |
| C | 0.9978   | 2.05029  | 0.23071  |
| H | 0.98569  | 2.67819  | -0.67162 |
| H | 0.0834   | 2.24789  | 0.79366  |
| H | 1.85647  | 2.3529   | 0.8356   |
| C | -0.10703 | -0.00127 | -0.84661 |
| H | 0.10576  | -1.04266 | -1.11752 |
| H | -0.32901 | 0.52885  | -1.78329 |
| C | -1.35302 | 0.00097  | 0.01118  |
| O | -1.38903 | 0.2518   | 1.19072  |
| O | -2.43278 | -0.33636 | -0.70797 |
| C | -3.65113 | -0.40559 | 0.03554  |
| H | -4.42237 | -0.6792  | -0.682   |
| H | -3.57184 | -1.15729 | 0.82334  |
| H | -3.8727  | 0.56111  | 0.49227  |

#### TS21

|   |          |          |          |
|---|----------|----------|----------|
| C | 1.26811  | -0.90931 | -0.86861 |
| C | 0.36794  | 0.1731   | -0.26142 |
| O | 1.46282  | -1.84608 | 0.18856  |
| O | 1.68423  | -1.04459 | 1.29178  |
| H | 0.79464  | -1.45685 | -1.68585 |
| H | 2.2236   | -0.47325 | -1.17967 |
| H | 0.86456  | -0.19092 | 0.94576  |
| C | -1.07486 | -0.21484 | -0.25356 |
| O | -1.50595 | -1.2416  | -0.7243  |
| O | -1.84412 | 0.69409  | 0.3688   |
| C | -3.22532 | 0.34236  | 0.45975  |
| H | -3.65564 | 0.2281   | -0.53719 |
| H | -3.34072 | -0.59834 | 1.00196  |
| H | -3.70572 | 1.1586   | 0.99573  |
| C | 0.71267  | 1.62734  | -0.48799 |
| H | 0.7266   | 1.81541  | -1.57239 |
| H | -0.08909 | 2.24619  | -0.07845 |
| C | 2.05445  | 2.03775  | 0.1224   |
| H | 2.88177  | 1.43104  | -0.2542  |
| H | 2.27282  | 3.08285  | -0.10734 |
| H | 2.03348  | 1.92416  | 1.20946  |

## TS22

|   |          |          |          |
|---|----------|----------|----------|
| C | 1.43306  | -0.20552 | -0.61594 |
| O | 1.56953  | -1.4029  | 0.16435  |
| O | 1.48247  | -0.95406 | 1.47128  |
| H | 0.62513  | -0.10736 | 1.21462  |
| C | 0.24579  | 0.50358  | 0.07012  |
| C | -1.06665 | -0.12139 | -0.28593 |
| O | -1.20495 | -1.01436 | -1.08813 |
| O | -2.0862  | 0.41669  | 0.40503  |
| C | -3.36223 | -0.16196 | 0.12838  |
| H | -4.0746  | 0.37883  | 0.74857  |
| H | -3.60822 | -0.05193 | -0.9298  |
| H | -3.3585  | -1.22438 | 0.38013  |
| C | 2.72012  | 0.59937  | -0.61982 |
| H | 3.51461  | 0.00547  | -1.07538 |
| H | 2.60553  | 1.5233   | -1.19271 |
| H | 3.01406  | 0.84712  | 0.40274  |
| C | 0.24731  | 1.998    | 0.25276  |
| H | 0.15917  | 2.5054   | -0.71759 |
| H | -0.60093 | 2.30557  | 0.86539  |
| H | 1.1723   | 2.33759  | 0.72256  |
| H | 1.1603   | -0.55501 | -1.61629 |

## TS23

|   |          |          |          |
|---|----------|----------|----------|
| C | 0.28683  | -0.3148  | -0.55672 |
| C | 1.53769  | 0.42203  | -0.05225 |
| O | 0.5119   | -1.65038 | -0.10944 |
| O | 0.89791  | -1.47537 | 1.22552  |
| H | 1.47673  | -0.37552 | 1.01026  |
| H | 0.20513  | -0.36587 | -1.64842 |
| C | -1.03428 | 0.17494  | 0.03287  |
| O | -1.17532 | 0.71964  | 1.09777  |
| O | -2.0458  | -0.14585 | -0.78296 |
| C | -3.34553 | 0.16564  | -0.27687 |
| H | 0        | -3.43956 | 1.24097  |
| H | -4.04887 | -0.17114 | -1.0357  |
| H | -3.51638 | -0.35356 | 0.66805  |
| C | 2.77959  | -0.01319 | -0.79614 |
| H | 3.68106  | 0.29271  | -0.25957 |
| H | 2.79638  | -1.09627 | -0.93562 |
| H | 2.80622  | 0.46245  | -1.7865  |
| C | 1.4669   | 1.89226  | 0.26216  |
| H | 1.30266  | 2.4627   | -0.66388 |
| H | 0.6618   | 2.12595  | 0.95696  |
| H | 2.41816  | 2.23198  | 0.68033  |

## TS24

|   |          |          |          |
|---|----------|----------|----------|
| C | -1.02294 | 0.39997  | 0.10398  |
| O | -1.41331 | 1.53199  | -0.03581 |
| O | -1.80785 | -0.67526 | 0.10924  |
| C | -3.1977  | -0.40338 | -0.08837 |
| H | -3.35411 | 0.07517  | -1.05704 |
| H | -3.6953  | -1.37004 | -0.0503  |
| H | -3.56993 | 0.25729  | 0.69719  |
| C | 0.43653  | 0.04197  | 0.3468   |
| C | 1.37921  | 1.16197  | -0.13135 |
| H | 1.11702  | 1.39629  | -1.1657  |
| C | 2.81298  | 0.71982  | -0.01887 |
| H | 3.47489  | 0.97498  | -0.84354 |
| H | 3.27389  | 0.82101  | 0.96343  |
| H | 2.63414  | -0.64727 | -0.08823 |
| H | 1.17328  | 2.05417  | 0.47114  |



|   |         |          |          |
|---|---------|----------|----------|
| H | 0.57638 | -0.15372 | 1.41938  |
| O | 0.74122 | -1.13606 | -0.37239 |
| O | 1.9701  | -1.58692 | 0.09653  |

#### TS25

|   |          |          |          |
|---|----------|----------|----------|
| C | -0.32647 | 0.20684  | 0.55229  |
| H | -0.27622 | -0.11781 | 1.59533  |
| C | -1.15595 | 1.45162  | 0.40657  |
| H | -1.39883 | 1.98889  | 1.32044  |
| H | -0.88331 | 2.08807  | -0.43343 |
| H | -2.35861 | 0.888    | 0.00834  |
| O | -2.31259 | -1.07391 | 0.11225  |
| O | -2.9693  | 0.01986  | -0.44478 |
| C | 1.09544  | 0.3954   | 0.04598  |
| O | 1.50676  | 1.34152  | -0.57448 |
| O | 1.84468  | -0.67678 | 0.35099  |
| C | 3.19857  | -0.61466 | -0.10451 |
| H | 3.70672  | 0.24439  | 0.33788  |
| H | 3.66314  | -1.54451 | 0.21773  |
| H | 3.23014  | -0.52199 | -1.19177 |
| C | -0.95826 | -0.97251 | -0.25011 |
| H | -0.48779 | -1.91976 | 0.02017  |
| H | -0.87168 | -0.79088 | -1.3278  |

#### TS26

|   |          |          |          |
|---|----------|----------|----------|
| C | -0.9433  | -0.27896 | 0.2107   |
| C | -2.21544 | -1.12395 | -0.01839 |
| H | -2.16259 | -1.5431  | -1.02797 |
| C | -3.45708 | -0.28906 | 0.14416  |
| H | -4.25314 | -0.43695 | -0.58231 |
| H | -3.81122 | -0.14544 | 1.16438  |
| H | -2.92424 | 0.95928  | -0.13137 |
| H | -2.20244 | -1.95787 | 0.69621  |
| H | -0.88206 | 0.06891  | 1.24819  |
| O | -1.02869 | 0.85177  | -0.64446 |
| O | -2.02236 | 1.68487  | -0.14712 |
| C | 0.32855  | -1.00405 | -0.18568 |
| H | 0.35849  | -1.16166 | -1.26656 |
| H | 0.35646  | -1.98642 | 0.29877  |
| C | 1.55428  | -0.23633 | 0.26159  |
| O | 1.6338   | 0.38821  | 1.28915  |
| O | 2.56012  | -0.36246 | -0.61423 |
| C | 3.76385  | 0.31192  | -0.24342 |
| H | 4.47122  | 0.12294  | -1.04862 |
| H | 3.57853  | 1.38218  | -0.13441 |
| H | 4.14289  | -0.07839 | 0.70331  |

#### TS27

|   |          |          |          |
|---|----------|----------|----------|
| C | -1.07498 | 0.42789  | -0.03437 |
| O | -1.45492 | 1.56319  | -0.17432 |
| O | -1.8782  | -0.63682 | -0.02108 |
| C | -3.26392 | -0.34563 | -0.21633 |
| H | -3.41626 | 0.12596  | -1.18905 |
| H | -3.77698 | -1.30381 | -0.16785 |
| H | -3.62353 | 0.32838  | 0.56385  |
| C | 0.38322  | 0.03347  | 0.20825  |
| C | 1.30761  | 1.23321  | -0.11069 |
| H | 0.97088  | 1.66348  | -1.05558 |
| C | 2.74724  | 0.80392  | -0.19518 |
| H | 3.3341   | 1.2194   | -1.01166 |
| H | 3.29567  | 0.73351  | 0.74361  |
| H | 2.56597  | -0.52668 | -0.52129 |

|   |          |          |          |
|---|----------|----------|----------|
| H | 1.15353  | 1.99083  | 0.66738  |
| O | 0.6604   | -0.97614 | -0.76085 |
| O | 1.92407  | -1.49476 | -0.50463 |
| C | 0.53276  | -0.48933 | 1.63451  |
| H | 0.19303  | 0.26953  | 2.34445  |
| H | -0.07255 | -1.38994 | 1.75222  |
| H | 1.57387  | -0.73548 | 1.84386  |

#### TS28

|   |          |          |          |
|---|----------|----------|----------|
| C | -1.28196 | 0.62948  | 0.1503   |
| C | -0.17327 | -0.30215 | -0.40504 |
| C | -0.42604 | -1.74605 | -0.03413 |
| H | -0.23865 | -2.49071 | -0.80373 |
| H | -0.09975 | -2.04197 | 0.96321  |
| H | -1.80626 | -1.68399 | 0.14987  |
| O | -2.52052 | 0.08837  | -0.28039 |
| O | -2.74624 | -1.08796 | 0.42318  |
| C | -1.20595 | 2.04008  | -0.39755 |
| H | -2.03361 | 2.63528  | -0.00772 |
| H | -0.26563 | 2.50271  | -0.0937  |
| H | -1.26964 | 2.0279   | -1.48921 |
| H | -1.24199 | 0.61809  | 1.24537  |
| C | 1.1818   | 0.12465  | 0.1339   |
| H | -0.15768 | -0.20319 | -1.49537 |
| O | 1.35969  | 0.85973  | 1.07381  |
| O | 2.17554  | -0.4563  | -0.5524  |
| C | 3.49062  | -0.14293 | -0.08773 |
| H | 4.17184  | -0.69777 | -0.72981 |
| H | 3.67472  | 0.9305   | -0.16561 |
| H | 3.60769  | -0.44604 | 0.95461  |

#### TS29

|   |          |          |          |
|---|----------|----------|----------|
| C | 1.27757  | 0.9694   | 0.29993  |
| C | 0.28122  | -0.21391 | 0.189    |
| C | 0.64846  | -1.05278 | -1.0159  |
| H | 0.52614  | -2.12984 | -0.91336 |
| H | 0.34506  | -0.65995 | -1.98686 |
| H | 2.01441  | -0.79119 | -1.04963 |
| O | 2.5801   | 0.43324  | 0.38439  |
| O | 2.901    | -0.07544 | -0.8705  |
| H | 1.19264  | 1.63593  | -0.56348 |
| C | -1.11083 | 0.37965  | 0.00649  |
| O | -1.36457 | 1.55875  | -0.01992 |
| O | -2.03853 | -0.58036 | -0.12057 |
| C | -3.37597 | -0.1052  | -0.29035 |
| H | -3.99877 | -0.99381 | -0.37243 |
| H | -3.67567 | 0.4992   | 0.56791  |
| H | -3.44925 | 0.50417  | -1.19336 |
| H | 1.11332  | 1.5309   | 1.22292  |
| C | 0.32605  | -1.05862 | 1.46922  |
| H | 0.0594   | -0.45799 | 2.34379  |
| H | -0.36964 | -1.89674 | 1.39659  |
| H | 1.33952  | -1.44139 | 1.6103   |

#### TS30

|   |         |          |          |
|---|---------|----------|----------|
| C | 0.29148 | -0.21176 | 0.26399  |
| C | 2.7343  | 0.04802  | -0.18329 |
| H | 3.37427 | 0.11285  | -1.06133 |
| H | 3.26997 | 0.16934  | 0.7599   |
| H | 2.3551  | -1.27012 | -0.1066  |
| O | 0.41888 | -1.47757 | -0.35733 |
| O | 1.56143 | -2.07736 | 0.15899  |

|   |          |          |          |
|---|----------|----------|----------|
| H | 0.37064  | -0.338   | 1.35291  |
| C | 1.39139  | 0.73527  | -0.26247 |
| H | 1.13923  | 0.93967  | -1.30734 |
| C | 1.38269  | 2.0499   | 0.5301   |
| H | 2.16093  | 2.72113  | 0.16013  |
| H | 0.41843  | 2.55223  | 0.43147  |
| H | 1.58069  | 1.85817  | 1.59015  |
| O | -1.35888 | 1.25915  | -0.7401  |
| O | -2.03615 | -0.53984 | 0.41982  |
| C | -3.38612 | -0.1861  | 0.10997  |
| H | -4.00653 | -0.94534 | 0.58129  |
| H | -3.61745 | 0.80513  | 0.50541  |
| H | -3.53522 | -0.18025 | -0.97137 |
| C | -1.11245 | 0.2747   | -0.08924 |

#### TS31

|   |          |          |          |
|---|----------|----------|----------|
| C | 1.03138  | -0.31125 | 0.09091  |
| O | 1.05637  | -0.92375 | -0.95414 |
| O | 2.0708   | 0.3945   | 0.56376  |
| C | 3.22758  | 0.38891  | -0.27273 |
| H | 2.99183  | 0.81332  | -1.25097 |
| H | 3.96949  | 0.99681  | 0.24167  |
| H | 3.59355  | -0.63072 | -0.41085 |
| C | -1.28464 | -1.14262 | 0.62769  |
| H | -0.89364 | -2.11462 | 0.30497  |
| C | -2.11263 | -0.56769 | -0.54472 |
| H | -1.50225 | -0.5157  | -1.45067 |
| H | -3.02418 | -1.14391 | -0.71665 |
| H | -1.94197 | -1.28617 | 1.48732  |
| O | -2.53935 | 0.72887  | -0.17073 |
| O | -1.43529 | 1.55038  | -0.18727 |
| C | -0.15643 | -0.21312 | 0.97194  |
| H | -0.69981 | 0.96194  | 0.52489  |
| H | 0.05516  | -0.00628 | 2.01879  |

#### TS32

|   |          |          |          |
|---|----------|----------|----------|
| C | -2.1058  | -1.20445 | 0.33096  |
| H | -1.98866 | -2.19719 | -0.12603 |
| C | -2.84129 | -0.29058 | -0.66893 |
| H | -2.31699 | -0.24325 | -1.63092 |
| H | -3.87368 | -0.61325 | -0.82478 |
| H | -2.73538 | -1.31373 | 1.21726  |
| O | -2.91936 | 1.00398  | -0.10936 |
| O | -1.63229 | 1.52677  | -0.10407 |
| C | -0.76992 | -0.61353 | 0.70837  |
| H | -1.06106 | 0.70143  | 0.52474  |
| H | -0.48654 | -0.67042 | 1.75896  |
| C | 0.36631  | -0.84317 | -0.25264 |
| H | 0.1146   | -0.49507 | -1.26172 |
| H | 0.59961  | -1.9133  | -0.35345 |
| C | 1.63157  | -0.1395  | 0.18343  |
| O | 1.76849  | 0.46642  | 1.21617  |
| O | 2.60432  | -0.28333 | -0.72942 |
| C | 3.84072  | 0.34695  | -0.39152 |
| H | 4.51915  | 0.13236  | -1.2151  |
| H | 3.6995   | 1.4238   | -0.27866 |
| H | 4.23066  | -0.05644 | 0.54518  |

#### TS33

|   |          |          |          |
|---|----------|----------|----------|
| C | -0.23591 | 0.03411  | 0.34099  |
| C | -0.64534 | -1.41608 | -0.00165 |
| H | -0.51284 | -1.61969 | -1.07091 |

|   |          |          |          |
|---|----------|----------|----------|
| H | -0.08152 | -2.13716 | 0.59198  |
| H | -0.3042  | 0.13047  | 1.43324  |
| O | -2.00136 | -1.57376 | 0.35478  |
| O | -2.7544  | -0.82759 | -0.54893 |
| C | -1.16502 | 1.03249  | -0.31039 |
| H | -2.26589 | 0.23812  | -0.4161  |
| C | 1.21297  | 0.30981  | -0.02866 |
| O | 1.62243  | 1.33369  | -0.51489 |
| O | 2.00226  | -0.73351 | 0.27393  |
| C | 3.38919  | -0.54319 | -0.01823 |
| H | 3.88631  | -1.46151 | 0.288    |
| H | 3.52938  | -0.36404 | -1.08594 |
| H | 3.7784   | 0.31232  | 0.53717  |
| H | -0.93971 | 1.18869  | -1.36832 |
| C | -1.46565 | 2.29278  | 0.45434  |
| H | -0.54467 | 2.88409  | 0.54726  |
| H | -2.20939 | 2.90802  | -0.05586 |
| H | -1.82884 | 2.0706   | 1.46202  |

#### TS34

|   |          |          |          |
|---|----------|----------|----------|
| C | -0.98971 | -0.69043 | 0.93513  |
| H | -0.74329 | -1.75093 | 0.80354  |
| C | -1.83696 | -0.26671 | -0.29338 |
| H | -1.25752 | -0.45392 | -1.20402 |
| H | -1.60322 | -0.57221 | 1.83211  |
| O | -2.05366 | 1.13362  | -0.16976 |
| O | -0.86256 | 1.77624  | -0.41126 |
| C | 0.26497  | 0.12637  | 1.03385  |
| H | -0.15528 | 1.24804  | 0.37183  |
| H | 0.56924  | 0.51133  | 2.0048   |
| C | 1.37137  | -0.31027 | 0.14987  |
| O | 1.2519   | -1.1191  | -0.74448 |
| C | 3.60851  | -0.00447 | -0.43714 |
| H | 4.45165  | 0.59377  | -0.09696 |
| H | 3.83889  | -1.06978 | -0.36754 |
| H | 3.35915  | 0.23369  | -1.47325 |
| O | 2.52055  | 0.32744  | 0.42489  |
| C | -3.20021 | -0.92379 | -0.33018 |
| H | -3.75989 | -0.594   | -1.2073  |
| H | -3.08758 | -2.00938 | -0.37404 |
| H | -3.7698  | -0.66638 | 0.5668   |

#### TS35

|   |          |          |          |
|---|----------|----------|----------|
| C | 1.08929  | -0.90861 | -0.19696 |
| H | 0.93225  | -1.76167 | -0.86709 |
| C | -0.01058 | 0.12933  | -0.46993 |
| H | 0.00092  | 0.44375  | -1.52334 |
| H | 0.95856  | -1.27026 | 0.82811  |
| O | 0.23084  | 1.26128  | 0.34216  |
| O | 1.34921  | 1.89875  | -0.18395 |
| C | 2.4588   | -0.29431 | -0.37217 |
| H | 2.13467  | 1.00263  | -0.17677 |
| C | -1.39152 | -0.42225 | -0.14713 |
| O | -1.64388 | -1.60105 | -0.11894 |
| O | -2.28277 | 0.54636  | 0.05373  |
| C | -3.60906 | 0.09184  | 0.33257  |
| H | -4.20164 | 0.99074  | 0.48915  |
| H | -3.99574 | -0.48659 | -0.50904 |
| H | -3.61379 | -0.5361  | 1.22542  |
| C | 3.52469  | -0.69025 | 0.61655  |
| H | 3.75208  | -1.76128 | 0.52846  |
| H | 4.45326  | -0.1393  | 0.45341  |

|   |         |          |         |
|---|---------|----------|---------|
| H | 3.18953 | -0.51119 | 1.6423  |
| H | 2.79304 | -0.24794 | -1.4122 |

#### TS36

|   |          |          |          |
|---|----------|----------|----------|
| C | 1.20932  | -0.8841  | 0.30733  |
| H | 0.851    | -1.48663 | 1.15305  |
| C | 1.77157  | 0.41759  | 0.93975  |
| H | 1.02207  | 0.88609  | 1.58351  |
| O | 2.12352  | 1.29298  | -0.11531 |
| O | 0.95494  | 1.75835  | -0.67536 |
| C | 0.03608  | -0.53006 | -0.56728 |
| H | 0.39199  | 0.74493  | -0.9101  |
| H | -0.05834 | -1.03051 | -1.5303  |
| C | -1.24176 | -0.2709  | 0.13735  |
| O | -1.34487 | -0.11696 | 1.33487  |
| C | -3.52804 | 0.12952  | -0.10079 |
| H | -4.2547  | 0.16636  | -0.91022 |
| H | -3.79939 | -0.63828 | 0.62692  |
| H | -3.46995 | 1.093    | 0.41004  |
| O | -2.27731 | -0.18356 | -0.71309 |
| H | 2.69809  | 0.22219  | 1.48589  |
| C | 2.2953   | -1.62057 | -0.47323 |
| H | 3.14106  | -1.87096 | 0.17292  |
| H | 1.90727  | -2.54854 | -0.90078 |
| H | 2.66585  | -0.99309 | -1.2885  |

#### TS37

|   |          |          |          |
|---|----------|----------|----------|
| C | 1.28391  | 0.33986  | -1.15417 |
| H | 0.87765  | 0.00128  | -2.114   |
| C | 2.11739  | -0.81366 | -0.56097 |
| H | 1.51514  | -1.72324 | -0.48516 |
| O | 2.54952  | -0.4114  | 0.72776  |
| O | 1.44787  | -0.42225 | 1.55244  |
| C | 0.1648   | 0.73724  | -0.2181  |
| H | 0.68952  | 0.28137  | 0.92676  |
| C | -1.01275 | -0.17538 | -0.30819 |
| O | -1.00873 | -1.23384 | -0.89747 |
| C | -3.2008  | -0.59822 | 0.38493  |
| H | -3.96569 | -0.0957  | 0.97403  |
| H | -3.55152 | -0.77353 | -0.63425 |
| H | -2.93411 | -1.55701 | 0.83449  |
| O | -2.07358 | 0.27792  | 0.3799   |
| H | 3.02719  | -0.99378 | -1.13786 |
| H | 1.94272  | 1.19504  | -1.32761 |
| C | -0.09444 | 2.21217  | -0.0139  |
| H | -0.45184 | 2.6702   | -0.94492 |
| H | -0.84776 | 2.37994  | 0.75591  |
| H | 0.82944  | 2.71994  | 0.27397  |

#### TS38

|   |         |          |          |
|---|---------|----------|----------|
| O | 0.38538 | -1.14422 | 0.32724  |
| O | 1.44955 | -1.77259 | -0.30968 |
| C | 0.10212 | 0.06985  | -0.35969 |
| H | 0.18659 | -0.12873 | -1.43787 |
| C | 3.13513 | -0.14197 | 0.46197  |
| H | 4.14139 | -0.42492 | 0.15468  |
| H | 2.99194 | -0.13241 | 1.54403  |
| H | 2.36849 | -1.20419 | 0.11141  |
| C | 2.4969  | 0.99533  | -0.29492 |
| H | 3.04752 | 1.92258  | -0.0838  |
| H | 2.59882 | 0.81856  | -1.37281 |
| C | 1.01992 | 1.21377  | 0.05663  |

|   |          |          |          |
|---|----------|----------|----------|
| H | 0.65053  | 2.12282  | -0.4257  |
| H | 0.90744  | 1.36508  | 1.13676  |
| C | -1.35785 | 0.41749  | -0.07131 |
| O | -1.75296 | 1.54041  | 0.12218  |
| O | -2.14346 | -0.65802 | -0.1051  |
| C | -3.52801 | -0.39524 | 0.12973  |
| H | -4.0265  | -1.36021 | 0.0657   |
| H | -3.66641 | 0.04727  | 1.11822  |
| H | -3.91727 | 0.29414  | -0.62231 |

#### TS39

|   |          |          |          |
|---|----------|----------|----------|
| O | -1.69459 | -0.99337 | -0.75846 |
| O | -2.61415 | 0.05028  | -0.82012 |
| C | -0.94265 | 1.81602  | -0.40992 |
| H | -1.39173 | 2.80762  | -0.45439 |
| H | -0.18163 | 1.64268  | -1.17094 |
| H | -1.93995 | 0.98417  | -0.82053 |
| C | -0.62437 | 1.30228  | 0.9715   |
| H | 0.18263  | 1.90533  | 1.40576  |
| H | -1.49993 | 1.43068  | 1.61799  |
| C | -0.20947 | -0.17942 | 1.01898  |
| H | 0.03129  | -0.41968 | 2.06484  |
| C | -1.29621 | -1.16931 | 0.5939   |
| H | -0.89403 | -2.18392 | 0.6346   |
| H | -2.17625 | -1.08403 | 1.23959  |
| C | 1.06767  | -0.49331 | 0.24938  |
| O | 1.38611  | -1.59701 | -0.11538 |
| O | 1.83813  | 0.59102  | 0.06108  |
| C | 3.07321  | 0.33517  | -0.6115  |
| H | 2.8857   | -0.11242 | -1.58922 |
| H | 3.56169  | 1.3023   | -0.71468 |
| H | 3.6892   | -0.3487  | -0.02401 |

#### TS40

|   |          |          |          |
|---|----------|----------|----------|
| O | -3.02776 | -0.0439  | 0.31623  |
| O | -2.67641 | -1.24931 | -0.28086 |
| C | -0.34793 | -1.2729  | 0.55078  |
| H | 0.17151  | -2.18564 | 0.26609  |
| H | -0.44796 | -1.12472 | 1.62745  |
| H | -1.65986 | -1.48131 | 0.18123  |
| C | 0.00081  | -0.03381 | -0.2446  |
| H | -0.08719 | -0.28018 | -1.31243 |
| C | -0.89713 | 1.16301  | 0.08747  |
| H | -0.48099 | 2.05677  | -0.38819 |
| H | -0.86574 | 1.34431  | 1.16774  |
| C | -2.34699 | 1.01034  | -0.35535 |
| H | -2.91351 | 1.90814  | -0.09141 |
| H | -2.42465 | 0.844    | -1.43634 |
| C | 1.46273  | 0.33703  | -0.01867 |
| O | 1.85905  | 1.41285  | 0.35249  |
| O | 2.27496  | -0.69683 | -0.29077 |
| C | 3.66714  | -0.42882 | -0.11465 |
| H | 4.18438  | -1.34676 | -0.38724 |
| H | 3.97945  | 0.39663  | -0.75751 |
| H | 3.87397  | -0.16293 | 0.92402  |

#### TS41

|   |          |          |          |
|---|----------|----------|----------|
| O | 2.32406  | -1.31984 | -0.16672 |
| O | 1.19762  | -1.51091 | 0.60325  |
| C | -0.13272 | 0.25991  | -0.48781 |
| H | -0.06196 | -0.04447 | -1.53395 |
| H | 0.38662  | -0.84555 | 0.0823   |

|   |          |          |          |
|---|----------|----------|----------|
| C | 2.25869  | 1.11808  | -0.44319 |
| H | 2.84741  | 2.00526  | -0.18472 |
| H | 2.31803  | 1.00307  | -1.53213 |
| C | 2.93282  | -0.08327 | 0.20798  |
| H | 3.96633  | -0.17642 | -0.13798 |
| H | 2.92144  | -0.01091 | 1.30115  |
| C | 0.80135  | 1.34892  | -0.02394 |
| H | 0.4522   | 2.30851  | -0.42753 |
| H | 0.71953  | 1.43472  | 1.06547  |
| C | -1.51831 | 0.32671  | 0.03928  |
| O | -1.87528 | 1.04417  | 0.94557  |
| O | -2.33496 | -0.53053 | -0.59737 |
| C | -3.67653 | -0.54745 | -0.11183 |
| H | -4.2011  | -1.28883 | -0.71167 |
| H | -3.69578 | -0.82262 | 0.94481  |
| H | -4.13602 | 0.43665  | -0.22644 |

#### TS42

|   |          |          |          |
|---|----------|----------|----------|
| C | -1.07575 | -0.13044 | -0.01829 |
| O | -2.22778 | -0.41566 | -0.17247 |
| O | -0.7144  | 1.17949  | -0.07695 |
| O | 1.28275  | -0.90107 | 0.45035  |
| O | 1.79261  | -0.21724 | -0.64681 |
| C | -0.05169 | -1.25356 | 0.16291  |
| H | -0.09922 | -1.85953 | -0.74811 |
| H | -0.38687 | -1.85997 | 1.00768  |
| C | 0.5464   | 1.64484  | 0.26279  |
| H | 0.63051  | 2.6867   | -0.03589 |
| H | 0.85506  | 1.41297  | 1.28504  |
| H | 1.42131  | 0.89065  | -0.38612 |

#### TS43

|   |          |          |          |
|---|----------|----------|----------|
| C | -0.39361 | 0.93543  | -0.19741 |
| O | -1.21448 | 1.7598   | -0.48413 |
| O | 0.85527  | 1.36359  | 0.13445  |
| O | 0.22089  | -1.48458 | 0.11452  |
| O | 1.30826  | -1.36608 | -0.74177 |
| C | -0.77355 | -0.55267 | -0.27595 |
| H | -1.02134 | -0.72321 | -1.33073 |
| C | 1.84767  | 0.53811  | 0.63661  |
| H | 2.78575  | 1.08691  | 0.66046  |
| H | 1.5783   | 0.00513  | 1.5516   |
| H | 1.91439  | -0.50075 | -0.18552 |
| C | -1.98045 | -0.82024 | 0.61075  |
| H | -2.77975 | -0.12835 | 0.3458   |
| H | -2.3183  | -1.84742 | 0.46772  |
| H | -1.71884 | -0.67796 | 1.66212  |

#### TS44

|   |          |          |          |
|---|----------|----------|----------|
| C | 0.64189  | 1.03601  | -0.19097 |
| O | 0.48559  | 2.18935  | -0.47603 |
| O | 1.87969  | 0.64063  | 0.21661  |
| C | 2.16563  | -0.61876 | 0.71638  |
| H | 1.58051  | -0.90522 | 1.59348  |
| H | 1.66242  | -1.48432 | -0.15283 |
| H | 3.24372  | -0.7273  | 0.80534  |
| C | -0.53575 | 0.06145  | -0.35009 |
| C | -1.72181 | 0.53803  | 0.48584  |
| H | -1.45091 | 0.45943  | 1.54517  |
| C | -2.98444 | -0.2666  | 0.1944   |
| H | -3.81808 | 0.09509  | 0.80007  |
| H | -3.26708 | -0.17468 | -0.8586  |

|   |          |          |          |
|---|----------|----------|----------|
| H | -2.83305 | -1.32541 | 0.41289  |
| H | -1.86653 | 1.59779  | 0.26349  |
| H | -0.78701 | 0.09108  | -1.4187  |
| O | -0.29807 | -1.28441 | 0.0261   |
| O | 0.70066  | -1.81148 | -0.78214 |

#### TS45

|   |          |          |          |
|---|----------|----------|----------|
| C | 1.06005  | 1.04774  | -0.1948  |
| O | 0.88105  | 2.18928  | -0.5121  |
| O | 2.26578  | 0.71748  | 0.34602  |
| C | 2.56195  | -0.52219 | 0.88747  |
| H | 1.90947  | -0.82972 | 1.70837  |
| H | 2.18742  | -1.41991 | -0.01377 |
| H | 3.63049  | -0.57725 | 1.08058  |
| C | -0.04513 | 0.01428  | -0.4646  |
| C | -1.34089 | 0.44777  | 0.21521  |
| H | -1.20205 | 0.39034  | 1.30249  |
| C | -2.53692 | -0.4025  | -0.20747 |
| H | -2.64766 | -0.34452 | -1.29732 |
| H | -2.33908 | -1.45183 | 0.03159  |
| H | -1.50417 | 1.49968  | -0.0367  |
| H | -0.17041 | 0.0116   | -1.55565 |
| O | 0.21202  | -1.31156 | -0.03277 |
| O | 1.30902  | -1.80704 | -0.72504 |
| C | -3.82349 | 0.06029  | 0.46962  |
| H | -4.04468 | 1.10275  | 0.22076  |
| H | -4.67642 | -0.54785 | 0.15962  |
| H | -3.73928 | -0.01102 | 1.55845  |

#### TS46

|   |          |          |          |
|---|----------|----------|----------|
| C | 0.07899  | 1.03419  | -0.16559 |
| O | -0.46948 | 2.04918  | -0.49227 |
| O | 1.43648  | 1.06027  | -0.05428 |
| C | 2.21103  | -0.00532 | 0.36974  |
| H | 1.97305  | -0.37836 | 1.36895  |
| H | 1.78526  | -1.0513  | -0.33452 |
| H | 3.25711  | 0.21853  | 0.17613  |
| C | -0.76991 | -0.22232 | 0.12663  |
| O | -0.01557 | -1.40627 | 0.39244  |
| O | 0.82985  | -1.67491 | -0.67569 |
| C | -1.70714 | -0.45506 | -1.05404 |
| H | -2.37476 | -1.2849  | -0.81143 |
| H | -2.28918 | 0.44508  | -1.25233 |
| H | -1.12962 | -0.71431 | -1.94327 |
| C | -1.53199 | 0.0285   | 1.42618  |
| H | -2.16912 | -0.83255 | 1.63944  |
| H | -0.84083 | 0.16965  | 2.26134  |
| H | -2.14805 | 0.92198  | 1.31652  |

#### TS47

|   |          |          |          |
|---|----------|----------|----------|
| C | -0.72647 | 1.02186  | 0.01577  |
| O | -0.59045 | 2.19051  | 0.24799  |
| O | -1.95153 | 0.60455  | -0.41162 |
| C | -2.25213 | -0.69171 | -0.79068 |
| H | -1.64539 | -1.08313 | -1.61098 |
| H | -1.77951 | -1.46346 | 0.18403  |
| H | -3.32948 | -0.78744 | -0.90118 |
| C | 0.47456  | 0.06998  | 0.20394  |
| O | 0.17828  | -1.31161 | -0.01076 |
| O | -0.82801 | -1.72068 | 0.85368  |
| C | 1.01664  | 0.27484  | 1.61598  |
| H | 1.86509  | -0.39288 | 1.7744   |



|   |         |          |          |
|---|---------|----------|----------|
| H | 1.32538 | 1.31222  | 1.75001  |
| H | 0.24459 | 0.03317  | 2.34858  |
| C | 1.49051 | 0.41364  | -0.89803 |
| H | 1.01082 | 0.2217   | -1.86559 |
| H | 1.67614 | 1.48956  | -0.8378  |
| C | 2.79385 | -0.37484 | -0.80117 |
| H | 2.59975 | -1.44901 | -0.76406 |
| H | 3.41823 | -0.16871 | -1.6734  |
| H | 3.36624 | -0.09682 | 0.08691  |

#### TS48

|   |          |          |          |
|---|----------|----------|----------|
| C | 1.13203  | -0.42277 | 0.00394  |
| O | 1.92849  | -0.31966 | -0.87957 |
| O | 0.80402  | 0.62559  | 0.8386   |
| C | 0.53603  | 1.83082  | 0.21186  |
| H | -0.7543  | 1.6264   | -0.14506 |
| H | 0.5464   | 2.64477  | 0.93275  |
| H | 1.09622  | 1.98751  | -0.7108  |
| C | -1.17388 | -1.13746 | 0.37349  |
| H | -1.39387 | -0.60698 | 1.30009  |
| O | -1.77554 | 1.02035  | -0.253   |
| O | -1.36764 | -0.21956 | -0.7149  |
| C | 0.28055  | -1.62418 | 0.33893  |
| H | 0.56585  | -2.04006 | 1.31052  |
| H | 0.45128  | -2.3762  | -0.43226 |
| H | -1.87454 | -1.96763 | 0.24639  |

#### TS49

|   |          |          |          |
|---|----------|----------|----------|
| C | 0.95392  | -1.01969 | 0.00325  |
| O | 1.64888  | -1.44622 | -0.86902 |
| O | 1.36654  | -0.02133 | 0.86352  |
| C | 1.96638  | 1.0754   | 0.26879  |
| H | 0.86618  | 1.76915  | -0.11169 |
| H | 2.48881  | 1.67257  | 1.01222  |
| H | 2.5157   | 0.84128  | -0.64386 |
| C | -1.27993 | -0.06415 | 0.31734  |
| H | -1.07998 | 0.47521  | 1.24524  |
| C | -2.76654 | -0.26637 | 0.09932  |
| H | -3.2855  | 0.69287  | 0.14644  |
| H | -2.94517 | -0.71174 | -0.88292 |
| H | -3.18002 | -0.9308  | 0.86333  |
| O | -0.29765 | 1.96966  | -0.28003 |
| O | -0.76047 | 0.75515  | -0.75455 |
| C | -0.48167 | -1.37938 | 0.29737  |
| H | -0.56512 | -1.88622 | 1.26396  |
| H | -0.82628 | -2.05516 | -0.48843 |

#### TS50

|   |          |          |          |
|---|----------|----------|----------|
| C | 1.50791  | -0.88325 | 0.02483  |
| O | 2.28442  | -1.18546 | -0.83034 |
| O | 1.71594  | 0.18398  | 0.87675  |
| C | 2.11296  | 1.36555  | 0.2754   |
| H | 0.91287  | 1.84491  | -0.12686 |
| H | 2.5087   | 2.05564  | 1.01663  |
| H | 2.70825  | 1.22631  | -0.62802 |
| C | -0.86824 | -0.35269 | 0.28404  |
| H | -0.79949 | 0.22472  | 1.20985  |
| C | -2.29313 | -0.81782 | 0.03347  |
| H | -2.32698 | -1.30191 | -0.94974 |
| H | -2.54502 | -1.58479 | 0.77602  |
| O | -0.26635 | 1.82557  | -0.31852 |
| O | -0.4821  | 0.54094  | -0.78555 |

|   |          |          |          |
|---|----------|----------|----------|
| C | 0.15781  | -1.49744 | 0.30115  |
| H | 0.15111  | -1.99588 | 1.27565  |
| H | 0        | -0.03944 | -2.23768 |
| C | -3.28298 | 0.34101  | 0.08992  |
| H | -2.99808 | 1.11421  | -0.6278  |
| H | -4.29594 | 0.00709  | -0.14529 |
| H | -3.29713 | 0.79503  | 1.08535  |

#### TS51

|   |          |          |          |
|---|----------|----------|----------|
| C | -0.32614 | -1.01505 | 0.13024  |
| O | -0.52154 | -1.79062 | -0.75753 |
| O | 0.86927  | -0.95555 | 0.81505  |
| C | 2.00876  | -0.96497 | 0.02807  |
| H | 2.05547  | 0.33969  | -0.33495 |
| H | 2.88779  | -1.16496 | 0.63592  |
| H | 1.90972  | -1.5422  | -0.892   |
| C | -0.42978 | 1.37094  | 0.563    |
| H | 0.26867  | 1.43804  | 1.39701  |
| O | 1.69036  | 1.47355  | -0.39019 |
| O | 0.33557  | 1.3671   | -0.65404 |
| C | -1.26159 | 0.07711  | 0.61146  |
| H | -1.08196 | 2.25064  | 0.55003  |
| H | -1.52991 | -0.12693 | 1.65575  |
| C | -2.5029  | 0.13295  | -0.27093 |
| H | -3.01423 | -0.83097 | -0.2887  |
| H | -3.1953  | 0.89386  | 0.09666  |
| H | -2.21962 | 0.38114  | -1.29706 |

#### TS52

|   |          |          |          |
|---|----------|----------|----------|
| C | -0.1664  | -0.9768  | -0.19221 |
| O | -0.17462 | -1.69111 | -1.15069 |
| O | 0.83538  | -1.02622 | 0.75706  |
| C | 2.1263   | -1.05178 | 0.25609  |
| H | 2.30812  | 0.265    | -0.00379 |
| H | 2.83079  | -1.32756 | 1.03705  |
| H | 2.22359  | -1.57348 | -0.69673 |
| C | -0.26862 | 1.37714  | 0.36469  |
| H | 0.21786  | 1.35207  | 1.34109  |
| O | 2.01575  | 1.41963  | -0.065   |
| O | 0.75639  | 1.40857  | -0.6401  |
| C | -1.1515  | 0.1341   | 0.1394   |
| H | -0.86888 | 2.28999  | 0.27149  |
| C | -2.08848 | 0.33189  | -1.04953 |
| H | -2.62283 | -0.59262 | -1.27855 |
| H | -2.81805 | 1.11385  | -0.81983 |
| H | -1.52365 | 0.62488  | -1.93799 |
| C | -1.92443 | -0.18934 | 1.42354  |
| H | -2.53049 | 0.67395  | 1.71527  |
| H | -2.59766 | -1.03603 | 1.26594  |
| H | -1.24315 | -0.42832 | 2.24396  |

#### TS53

|   |          |          |          |
|---|----------|----------|----------|
| C | -0.71584 | 1.07723  | 0.17411  |
| O | -1.16212 | 1.81719  | -0.65162 |
| O | -1.5071  | 0.20352  | 0.89068  |
| C | -2.42152 | -0.52423 | 0.14795  |
| H | -1.61745 | -1.51012 | -0.3233  |
| H | -3.15826 | -0.98561 | 0.80107  |
| H | -2.80512 | 0.00383  | -0.7259  |
| C | 0.99028  | -0.63892 | 0.39958  |
| H | 0.51034  | -1.15395 | 1.23322  |
| O | -0.59296 | -2.08815 | -0.51836 |

|   |         |          |          |
|---|---------|----------|----------|
| O | 0.29682 | -1.06605 | -0.79706 |
| C | 0.74495 | 0.88385  | 0.53398  |
| C | 1.61761 | 1.75189  | -0.36486 |
| H | 1.2911  | 2.79216  | -0.31998 |
| H | 2.66462 | 1.70075  | -0.05952 |
| H | 1.53481 | 1.42211  | -1.40399 |
| H | 0.88331 | 1.15609  | 1.58837  |
| C | 2.44861 | -1.03782 | 0.28504  |
| H | 3.01876 | -0.66981 | 1.14327  |
| H | 2.52576 | -2.12643 | 0.2511   |
| H | 2.8904  | -0.63304 | -0.6283  |

#### TS54

|   |          |          |          |
|---|----------|----------|----------|
| C | 1.11341  | -1.02228 | 0.15169  |
| O | 1.82831  | -1.57976 | -0.62668 |
| O | 1.4988   | 0.1143   | 0.83108  |
| C | 2.13356  | 1.07746  | 0.06524  |
| H | 1.04564  | 1.65758  | -0.50354 |
| H | 2.61169  | 1.81614  | 0.70383  |
| H | 2.73116  | 0.67345  | -0.75251 |
| C | -1.21329 | -0.14918 | 0.08294  |
| O | -0.10514 | 1.80115  | -0.74829 |
| O | -0.54916 | 0.52516  | -1.03357 |
| C | -0.31593 | -1.35906 | 0.48082  |
| H | -0.42052 | -1.56965 | 1.54992  |
| H | -0.5781  | -2.25509 | -0.08464 |
| C | -2.51975 | -0.65551 | -0.51587 |
| H | -3.03416 | -1.31127 | 0.19276  |
| H | -3.1711  | 0.18666  | -0.76075 |
| H | -2.31807 | -1.21867 | -1.43072 |
| C | -1.46849 | 0.79026  | 1.24974  |
| H | -2.06271 | 0.25578  | 1.99643  |
| H | -0.5366  | 1.12193  | 1.70698  |
| H | -2.02661 | 1.66622  | 0.91468  |

#### TS55

|   |          |          |          |
|---|----------|----------|----------|
| C | -0.01398 | -1.29091 | 0.07765  |
| O | -0.39485 | -1.76236 | 1.1104   |
| O | -0.85691 | -0.72788 | -0.85073 |
| C | -2.08184 | -0.27279 | -0.3995  |
| H | -2.78142 | -0.18972 | -1.22757 |
| H | -2.43597 | -0.77041 | 0.50256  |
| H | -1.76399 | 0.99358  | -0.02471 |
| C | 2.00422  | 0.1923   | -0.0036  |
| H | 2.20926  | 0.19719  | 1.07177  |
| C | 1.08504  | 1.36781  | -0.30983 |
| H | 1.61902  | 2.32241  | -0.24243 |
| H | 0.61929  | 1.28306  | -1.29578 |
| H | 2.95969  | 0.33006  | -0.51748 |
| O | 0.0625   | 1.32906  | 0.68907  |
| O | -1.09204 | 1.93198  | 0.2297   |
| C | 1.40923  | -1.17481 | -0.40496 |
| H | 1.41805  | -1.2787  | -1.49303 |
| H | 1.99047  | -1.98343 | 0.04057  |

#### TS56

|   |          |          |          |
|---|----------|----------|----------|
| C | -1.40791 | -0.75619 | 0.05294  |
| O | -2.04707 | -0.72475 | 1.06489  |
| O | -1.41812 | 0.25727  | -0.87693 |
| C | -1.77045 | 1.51876  | -0.43531 |
| H | -2.07966 | 2.13707  | -1.27441 |
| H | -2.41193 | 1.51911  | 0.44503  |

|   |          |          |          |
|---|----------|----------|----------|
| H | -0.56876 | 1.99479  | -0.0164  |
| C | 0.97864  | -1.52875 | 0.0474   |
| H | 1.06886  | -1.68349 | 1.12851  |
| C | 1.41785  | -0.09761 | -0.25021 |
| H | 1.06301  | 0.22519  | -1.23536 |
| H | 1.66238  | -2.23027 | -0.43993 |
| O | 0.73082  | 0.69188  | 0.73655  |
| O | 0.57318  | 1.99054  | 0.29237  |
| C | -0.46513 | -1.84234 | -0.39981 |
| H | -0.50968 | -1.90938 | -1.49001 |
| H | -0.79719 | -2.78699 | 0.03369  |
| C | 2.91458  | 0.11929  | -0.11982 |
| H | 3.45496  | -0.42506 | -0.89901 |
| H | 3.1378   | 1.18409  | -0.21647 |
| H | 3.26419  | -0.22349 | 0.85817  |

#### TS57

|   |          |          |          |
|---|----------|----------|----------|
| C | 0.53634  | -0.92385 | 0.03031  |
| O | 0.62083  | -1.53635 | 1.05685  |
| O | -0.49374 | -1.08891 | -0.862   |
| C | -1.67721 | -1.61448 | -0.37703 |
| H | -2.26484 | -2.03136 | -1.19142 |
| H | -1.55898 | -2.22727 | 0.5159   |
| H | -2.31382 | -0.4827  | 0.02635  |
| C | 0.9664   | 1.52967  | -0.06259 |
| H | 1.15509  | 1.67383  | 1.00803  |
| C | -0.51876 | 1.75009  | -0.31292 |
| H | -0.83507 | 1.37274  | -1.28936 |
| H | 1.5449   | 2.28983  | -0.5973  |
| O | -1.20032 | 1.01648  | 0.70863  |
| O | -2.46637 | 0.65833  | 0.28764  |
| C | 1.49075  | 0.1349   | -0.47726 |
| H | 1.47836  | 0.07715  | -1.57127 |
| H | -0.78442 | 2.81032  | -0.23261 |
| C | 2.8952   | -0.10622 | 0.06433  |
| H | 3.30137  | -1.05413 | -0.29577 |
| H | 3.56641  | 0.69851  | -0.24644 |
| H | 2.87148  | -0.14398 | 1.1559   |

#### TS58

|   |          |          |          |
|---|----------|----------|----------|
| C | 0.33772  | -1.28585 | 0.01323  |
| O | 0.47604  | -1.7182  | -1.09624 |
| O | 1.35618  | -0.70047 | 0.72599  |
| C | 2.41682  | -0.18198 | 0.00724  |
| H | 3.29328  | -0.08739 | 0.64371  |
| H | 2.55881  | -0.64145 | -0.97013 |
| H | 1.96855  | 1.07575  | -0.23622 |
| C | -1.69711 | 0.07883  | 0.55303  |
| C | -0.78227 | 1.29998  | 0.65759  |
| H | -0.12024 | 1.24495  | 1.52678  |
| O | 0.01684  | 1.32696  | -0.5277  |
| O | 1.21089  | 1.98183  | -0.29496 |
| C | -0.9302  | -1.24105 | 0.82461  |
| H | -0.67078 | -1.31283 | 1.88366  |
| H | -1.37287 | 2.22288  | 0.71017  |
| H | -1.55181 | -2.0936  | 0.54303  |
| C | -2.4077  | 0.03413  | -0.80174 |
| H | -3.16341 | -0.75565 | -0.81019 |
| H | -2.90273 | 0.98634  | -1.01245 |
| H | -1.69372 | -0.16471 | -1.60426 |
| H | -2.44826 | 0.18037  | 1.34541  |

## TS59

|   |          |          |          |
|---|----------|----------|----------|
| C | 1.21631  | -0.00825 | 0.03099  |
| O | 2.3372   | -0.18328 | -0.35738 |
| O | 0.41019  | -1.08416 | 0.28676  |
| C | -0.94337 | -1.1405  | -0.12466 |
| H | -1.34774 | -2.04099 | 0.33722  |
| H | -1.00256 | -1.1738  | -1.21604 |
| O | -1.73132 | -0.08312 | 0.34233  |
| O | -1.57424 | 0.98944  | -0.52712 |
| C | 0.68206  | 1.33611  | 0.37998  |
| H | 0.33653  | 1.42599  | 1.40998  |
| H | -0.53709 | 1.39688  | -0.20993 |
| H | 1.28624  | 2.15667  | 0.00418  |

## TS60

|   |          |          |          |
|---|----------|----------|----------|
| C | -0.53273 | 0.83634  | 0.09422  |
| O | -1.02613 | 1.57824  | -0.70613 |
| O | 0.71904  | 1.08079  | 0.64113  |
| C | 1.79095  | 0.50763  | -0.06761 |
| H | 2.71132  | 0.90117  | 0.36256  |
| H | 1.70168  | 0.71336  | -1.13955 |
| O | 1.83692  | -0.88456 | 0.14207  |
| O | 0.84038  | -1.46341 | -0.61835 |
| C | -1.10963 | -0.44604 | 0.56885  |
| H | -0.89076 | -0.65737 | 1.61662  |
| H | -0.16683 | -1.21211 | -0.00571 |
| C | -2.46138 | -0.81981 | 0.03597  |
| H | -2.71271 | -1.85327 | 0.27955  |
| H | -3.22773 | -0.1693  | 0.47425  |
| H | -2.49986 | -0.67967 | -1.04613 |

## TS61

|   |          |          |          |
|---|----------|----------|----------|
| C | 0.26417  | 1.10741  | 0.10719  |
| O | 0.15533  | 2.02332  | -0.65672 |
| O | 1.48089  | 0.78929  | 0.69507  |
| C | 2.25016  | -0.15164 | -0.01434 |
| H | 3.23086  | -0.19002 | 0.45898  |
| H | 2.30206  | 0.11071  | -1.07619 |
| C | -2.17074 | 0.36813  | -0.10781 |
| H | -2.59636 | 1.28401  | 0.32653  |
| C | -3.10478 | -0.81475 | 0.13241  |
| H | -4.08865 | -0.63079 | -0.30387 |
| H | -2.70092 | -1.72725 | -0.31602 |
| H | -3.23936 | -0.99891 | 1.2023   |
| H | -2.05882 | 0.57294  | -1.17738 |
| O | 1.71071  | -1.44491 | 0.12533  |
| O | 0.59929  | -1.5363  | -0.68979 |
| C | -0.8091  | 0.15774  | 0.4911   |
| H | -0.75684 | -0.16322 | 1.53415  |
| H | -0.24006 | -0.90994 | -0.09094 |

## TS62

|   |          |          |          |
|---|----------|----------|----------|
| C | 0.81954  | 1.11573  | 0.10537  |
| O | 0.73297  | 2.02107  | -0.67378 |
| O | 2.04162  | 0.7253   | 0.63605  |
| C | 2.70668  | -0.27518 | -0.09669 |
| H | 3.70798  | -0.37055 | 0.32183  |
| H | 2.71452  | -0.03374 | -1.16466 |
| O | 2.09329  | -1.52764 | 0.09874  |
| O | 0.93305  | -1.5579  | -0.65037 |
| C | -0.29256 | 0.24944  | 0.56788  |
| H | -0.20367 | -0.05457 | 1.61345  |

|   |          |          |          |
|---|----------|----------|----------|
| H | 0.17261  | -0.86378 | -0.01933 |
| C | -1.66748 | 0.53702  | 0.03762  |
| H | -2.02621 | 1.47295  | 0.49294  |
| H | -1.60112 | 0.73818  | -1.03777 |
| C | -2.66354 | -0.58773 | 0.31698  |
| H | -2.29508 | -1.51474 | -0.13916 |
| H | -2.70914 | -0.77179 | 1.39724  |
| C | -4.05675 | -0.26489 | -0.21354 |
| H | -4.75869 | -1.07681 | -0.01014 |
| H | -4.4504  | 0.64488  | 0.2501   |
| H | -4.03357 | -0.10299 | -1.29534 |

#### TS63

|   |          |          |          |
|---|----------|----------|----------|
| C | -0.35486 | -1.03839 | -0.00703 |
| O | -0.09836 | -1.87232 | -0.82854 |
| O | -1.58417 | -1.00914 | 0.63621  |
| C | -2.553   | -0.18166 | 0.03756  |
| H | -3.49696 | -0.37265 | 0.54708  |
| H | -2.60892 | -0.36705 | -1.04029 |
| O | -2.26553 | 1.17727  | 0.26603  |
| O | -1.24208 | 1.54713  | -0.58554 |
| C | 0.52404  | 0.08443  | 0.40539  |
| H | 0.45896  | 0.31786  | 1.47191  |
| H | -0.26675 | 1.05038  | -0.07846 |
| C | 1.88196  | 0.19069  | -0.23785 |
| H | 1.75416  | 0.01383  | -1.31246 |
| C | 2.47975  | 1.57959  | -0.01452 |
| H | 3.4592   | 1.65921  | -0.49316 |
| H | 1.83465  | 2.3631   | -0.42297 |
| H | 2.61232  | 1.77354  | 1.0555   |
| C | 2.80074  | -0.90911 | 0.31697  |
| H | 2.93699  | -0.78611 | 1.3968   |
| H | 2.38105  | -1.89887 | 0.12479  |
| H | 3.78473  | -0.85012 | -0.15715 |

#### TS64

|   |          |          |          |
|---|----------|----------|----------|
| C | -0.39549 | 0.98276  | 0.10551  |
| O | -0.87979 | 1.97622  | -0.35549 |
| O | 0.83132  | 1.02405  | 0.74827  |
| C | 1.9393   | 0.50375  | 0.05016  |
| H | 2.81284  | 0.68939  | 0.6747   |
| H | 2.02444  | 0.96566  | -0.93864 |
| O | 1.86217  | -0.89183 | -0.10005 |
| O | 1.0094   | -1.16356 | -1.15338 |
| C | -1.02125 | -0.37884 | 0.06901  |
| H | -0.10031 | -0.95579 | -0.65799 |
| C | -2.31964 | -0.4303  | -0.69542 |
| H | -2.62941 | -1.46451 | -0.8612  |
| H | -3.10558 | 0.07423  | -0.12034 |
| H | -2.23631 | 0.0841   | -1.6543  |
| C | -0.95416 | -1.1594  | 1.36424  |
| H | -1.58271 | -0.67978 | 2.12529  |
| H | -1.32737 | -2.17442 | 1.21102  |
| H | 0.06704  | -1.20579 | 1.74573  |

#### TS65

|   |         |          |          |
|---|---------|----------|----------|
| C | 0.34346 | 1.16271  | 0.02018  |
| O | 0.17528 | 2.19629  | -0.56097 |
| O | 1.58836 | 0.8336   | 0.53234  |
| C | 2.33133 | -0.13955 | -0.16601 |
| H | 3.29763 | -0.20765 | 0.33326  |
| H | 2.42243 | 0.1303   | -1.22306 |

|   |          |          |          |
|---|----------|----------|----------|
| O | 1.75676  | -1.41869 | -0.06639 |
| O | 0.71594  | -1.49464 | -0.97349 |
| C | -0.71535 | 0.13115  | 0.27232  |
| H | -0.16606 | -0.82994 | -0.41929 |
| C | -2.04033 | 0.45222  | -0.38407 |
| H | -2.47408 | 1.31683  | 0.13883  |
| H | -1.84833 | 0.79251  | -1.40608 |
| C | -0.73452 | -0.44763 | 1.6712   |
| H | -1.14545 | 0.28718  | 2.37553  |
| H | -1.36164 | -1.34035 | 1.71127  |
| H | 0.27228  | -0.71124 | 1.99707  |
| C | -3.02543 | -0.71409 | -0.38103 |
| H | -3.34619 | -0.97213 | 0.63148  |
| H | -3.91874 | -0.46057 | -0.95563 |
| H | -2.5775  | -1.60622 | -0.83079 |

#### TS66

|   |          |          |          |
|---|----------|----------|----------|
| C | 1.30928  | -0.31123 | 0.0403   |
| O | 2.40357  | -0.48074 | -0.41753 |
| C | 0.13776  | 1.87955  | -0.30253 |
| H | -1.11601 | 1.34683  | -0.31618 |
| H | -0.06764 | 2.88896  | 0.05195  |
| H | 0.46554  | 1.83391  | -1.34088 |
| C | -0.92444 | -1.25941 | 0.39571  |
| O | -2.02014 | 0.71451  | 0.01349  |
| O | -1.75086 | -0.55404 | -0.48963 |
| O | 0.41142  | -1.33029 | -0.04887 |
| H | -1.26761 | -2.29436 | 0.37857  |
| H | -1.01656 | -0.8237  | 1.39407  |
| C | 0.89513  | 1.00707  | 0.67211  |
| H | 1.83539  | 1.49191  | 0.95373  |
| H | 0.30858  | 0.86501  | 1.5856   |

#### TS67

|   |          |          |          |
|---|----------|----------|----------|
| C | 0.78533  | -0.88477 | -0.1044  |
| O | 1.6822   | -1.55334 | -0.53539 |
| C | 0.40523  | 1.49266  | -0.71035 |
| H | -0.93198 | 1.48976  | -0.47571 |
| H | 0.63723  | 2.54589  | -0.54782 |
| H | 0.51044  | 1.17668  | -1.74898 |
| C | -1.58966 | -0.88417 | 0.55962  |
| O | -1.92942 | 1.32391  | 0.0798   |
| O | -2.28741 | 0.02072  | -0.24765 |
| O | -0.46051 | -1.43591 | -0.08245 |
| H | -2.26098 | -1.73157 | 0.70395  |
| H | -1.33866 | -0.40386 | 1.50938  |
| C | 0.98157  | 0.56129  | 0.33813  |
| H | 0.45412  | 0.73919  | 1.28379  |
| C | 2.47661  | 0.82721  | 0.54589  |
| H | 2.62828  | 1.85253  | 0.89054  |
| H | 2.88937  | 0.13851  | 1.2861   |
| H | 3.01879  | 0.67659  | -0.38893 |

#### TS68

|   |          |          |          |
|---|----------|----------|----------|
| C | -0.2318  | -0.83567 | -0.17654 |
| O | -0.17363 | -1.56071 | -1.12694 |
| C | -0.5814  | 1.52141  | 0.35745  |
| H | 0.60545  | 1.47061  | -0.31617 |
| H | -1.07178 | 2.41353  | -0.03299 |
| H | -0.17058 | 1.63933  | 1.36105  |
| C | 2.05042  | -0.7272  | 0.33978  |
| O | 1.61557  | 1.14982  | -0.82652 |

|   |          |          |          |
|---|----------|----------|----------|
| O | 2.38159  | 0.63226  | 0.21145  |
| O | 0.72415  | -0.82058 | 0.8107   |
| H | 2.71839  | -1.11963 | 1.1062   |
| H | 2.1472   | -1.24469 | -0.61797 |
| C | -1.30941 | 0.20907  | 0.10089  |
| C | -2.09353 | -0.20819 | 1.36029  |
| H | -2.83344 | 0.56001  | 1.60192  |
| H | -2.62017 | -1.15142 | 1.18662  |
| H | -1.42248 | -0.33033 | 2.21356  |
| C | -2.22816 | 0.30348  | -1.11473 |
| H | -2.67927 | -0.66714 | -1.33149 |
| H | -3.02372 | 1.02913  | -0.92378 |
| H | -1.6677  | 0.61681  | -1.9992  |

#### TS69

|   |          |          |          |
|---|----------|----------|----------|
| C | -0.10162 | 0.95893  | 0.15867  |
| O | -0.12711 | 1.78837  | -0.70311 |
| C | 0.55877  | -1.37829 | 0.46121  |
| H | -0.51685 | -1.39469 | -0.37861 |
| H | 1.23162  | -2.10926 | 0.01331  |
| H | 0.05417  | -1.7305  | 1.36013  |
| C | -2.38806 | 0.45913  | 0.24284  |
| O | -1.4712  | -1.15779 | -1.02723 |
| O | -2.47371 | -0.90026 | -0.10038 |
| O | -1.18256 | 0.66101  | 0.94796  |
| H | -3.22058 | 0.64336  | 0.92138  |
| H | -2.41336 | 1.09073  | -0.64834 |
| C | 1.07256  | 0.05268  | 0.50373  |
| H | 1.35643  | 0.29091  | 1.54062  |
| C | 2.24897  | 0.31632  | -0.43488 |
| H | 2.39662  | 1.39719  | -0.51227 |
| H | 1.97244  | -0.02432 | -1.43964 |
| C | 3.53609  | -0.35895 | 0.02826  |
| H | 4.35245  | -0.15958 | -0.66952 |
| H | 3.83913  | 0.01138  | 1.01268  |
| H | 3.42426  | -1.44483 | 0.10347  |

#### TS70

|   |          |          |          |
|---|----------|----------|----------|
| C | 0.82389  | 1.25114  | 0.03846  |
| O | 1.1165   | 2.31954  | -0.41881 |
| C | -1.46955 | 0.31789  | -0.38832 |
| H | -1.00957 | -0.92978 | -0.43454 |
| H | -1.34073 | 0.68573  | -1.4093  |
| C | 1.53981  | -1.06062 | 0.44355  |
| O | -0.51302 | -1.93522 | -0.06046 |
| O | 0.81236  | -1.83751 | -0.46673 |
| O | 1.75162  | 0.25629  | -0.01476 |
| H | 2.53889  | -1.4956  | 0.48679  |
| H | 1.04532  | -1.09342 | 1.4182   |
| C | -0.54937 | 0.9747   | 0.6228   |
| H | -0.50797 | 0.36365  | 1.53072  |
| H | -0.94659 | 1.95758  | 0.89908  |
| C | -2.8978  | 0.14446  | 0.05938  |
| H | -3.37248 | 1.1225   | 0.21085  |
| H | -3.48472 | -0.40356 | -0.68019 |
| H | -2.94365 | -0.39728 | 1.00931  |

#### TS71

|   |         |          |          |
|---|---------|----------|----------|
| C | 0.11277 | -1.36846 | -0.16078 |
| O | 0.63744 | -2.30073 | -0.70298 |
| C | 0.87597 | 0.95816  | -0.57035 |
| H | -0.353  | 1.42858  | -0.42992 |



|   |          |          |          |
|---|----------|----------|----------|
| H | 0.93305  | 0.65043  | -1.61856 |
| C | -2.03719 | -0.38686 | 0.54777  |
| O | -1.35978 | 1.7473   | 0.11539  |
| O | -2.26609 | 0.75304  | -0.22886 |
| O | -1.24856 | -1.34755 | -0.11977 |
| H | -3.00903 | -0.86706 | 0.66705  |
| H | -1.61363 | -0.0912  | 1.51141  |
| C | 0.91518  | -0.20536 | 0.413    |
| H | 0.47087  | 0.13795  | 1.3561   |
| C | 1.71227  | 2.16304  | -0.21836 |
| H | 2.78127  | 1.94922  | -0.33782 |
| H | 1.47059  | 3.00863  | -0.8663  |
| H | 1.5422   | 2.46424  | 0.82036  |
| C | 2.34899  | -0.6771  | 0.68037  |
| H | 2.83618  | -0.9547  | -0.25649 |
| H | 2.92279  | 0.11402  | 1.16716  |
| H | 2.34669  | -1.55701 | 1.32684  |

#### TS72

|   |          |          |          |
|---|----------|----------|----------|
| C | 0.8101   | 1.40761  | 0.03271  |
| O | 0.76658  | 2.51566  | -0.42211 |
| C | -1.07553 | -0.18598 | -0.41739 |
| H | -0.2519  | -1.2264  | -0.4484  |
| H | -1.05508 | 0.20852  | -1.43779 |
| C | 2.20228  | -0.56862 | 0.46021  |
| O | 0.52098  | -2.0324  | -0.04992 |
| O | 1.76188  | -1.54534 | -0.44103 |
| O | 1.9972   | 0.74286  | -0.01581 |
| H | 3.28668  | -0.67105 | 0.51263  |
| H | 1.73607  | -0.74125 | 1.43396  |
| C | -0.41877 | 0.72383  | 0.60393  |
| H | -0.20194 | 0.15397  | 1.51403  |
| H | -1.09512 | 1.54202  | 0.87213  |
| C | -2.39099 | -0.80709 | -0.00669 |
| H | -2.65749 | -1.58678 | -0.72761 |
| H | -2.26704 | -1.30113 | 0.96463  |
| C | -3.52811 | 0.21998  | 0.07255  |
| H | -4.47144 | -0.27248 | 0.32036  |
| H | -3.33523 | 0.97522  | 0.83905  |
| H | -3.65438 | 0.73474  | -0.88391 |

#### TS73

|   |          |          |          |
|---|----------|----------|----------|
| C | -0.76562 | 1.31928  | -0.24205 |
| O | -0.84044 | 2.47387  | 0.0728   |
| C | 1.36102  | -0.03311 | 0.02488  |
| H | 0.77815  | -1.19184 | 0.06195  |
| C | -1.90041 | -0.85601 | -0.28267 |
| O | 0.01029  | -2.10762 | -0.14095 |
| O | -1.13838 | -1.70966 | 0.52813  |
| O | -1.79825 | 0.49819  | 0.09838  |
| H | -2.94537 | -1.10806 | -0.09827 |
| H | -1.62586 | -1.02017 | -1.32804 |
| C | 0.45787  | 0.74592  | -0.92972 |
| H | 0.19578  | 0.11466  | -1.78592 |
| H | 1.00049  | 1.61778  | -1.31087 |
| C | 2.71673  | -0.33238 | -0.57417 |
| H | 3.29586  | 0.59609  | -0.67084 |
| H | 3.28586  | -1.01653 | 0.05997  |
| H | 2.62458  | -0.77489 | -1.57024 |
| C | 1.36704  | 0.45401  | 1.45573  |
| H | 2.06634  | -0.12787 | 2.06011  |
| H | 1.66588  | 1.51014  | 1.4962   |

H 0.37283 0.37617 1.90711

TS74

C -1.82115 1.57994 0.10728  
H -2.55138 1.85056 0.87015  
H -2.03813 2.01154 -0.87108  
H -2.10947 0.25305 -0.097  
C -0.10205 -1.54417 0.50615  
H -0.04409 -2.61893 0.69356  
H -0.52777 -1.02848 1.37121  
O -0.94343 -1.29812 -0.61035  
O -2.19165 -0.8974 -0.14979  
O 1.21665 -1.15885 0.23699  
C 1.61665 0.10805 -0.1016  
O 2.79038 0.34285 -0.05469  
C 0.59046 1.11812 -0.57571  
H 1.17753 1.94641 -0.97209  
H 0.02683 0.67033 -1.39707  
C -0.37623 1.61968 0.52744  
H -0.11048 2.65417 0.78169  
H -0.24487 1.06375 1.46198

TS75

C -1.03792 2.11076 0.36043  
H -1.63051 2.62681 1.11588  
H -0.85815 2.7093 -0.53443  
H -1.9197 1.15831 -0.08777  
C -1.18122 -1.50136 0.29953  
H -1.66049 -2.48287 0.27383  
H -1.42732 -0.97922 1.22736  
O -1.65776 -0.71888 -0.78443  
O -2.56221 0.22176 -0.30654  
O 0.18721 -1.7805 0.17889  
C 1.20145 -0.8622 0.08436  
O 2.31765 -1.26364 0.25471  
C 0.87569 0.57519 -0.29078  
H 0.20652 0.52296 -1.15383  
C 0.13854 1.31655 0.85769  
H 0.85784 1.99138 1.34411  
H -0.18565 0.63515 1.65216  
C 2.15551 1.3066 -0.68423  
H 2.63557 0.83151 -1.54159  
H 1.92292 2.34392 -0.94277  
H 2.86761 1.29954 0.14396

TS76

C 0.94368 -2.01944 0.17755  
H 1.19166 -2.79667 -0.54693  
H 1.21004 -2.28102 1.20372  
H -0.42987 -2.06067 0.17895  
C -1.84473 0.25243 -0.6172  
H -2.86652 0.53175 -0.88278  
H -1.34564 -0.23018 -1.46132  
O -1.88329 -0.67591 0.45611  
O -1.56342 -1.94239 -0.01929  
O -1.23738 1.46298 -0.25137  
C 0.05341 1.59904 0.19161  
O 0.56544 2.67809 0.09107  
C 1.25461 -0.60472 -0.23663  
H 0.75766 -0.42168 -1.19868  
C 0.73623 0.40678 0.82191  
H 1.57805 0.81149 1.38749

|   |         |          |          |
|---|---------|----------|----------|
| H | 0.0446  | -0.07268 | 1.51568  |
| C | 2.7584  | -0.40364 | -0.47411 |
| H | 2.95541 | 0.63583  | -0.75361 |
| H | 3.32061 | -0.62542 | 0.4382   |
| H | 3.12358 | -1.05564 | -1.27162 |

#### TS77

|   |          |          |          |
|---|----------|----------|----------|
| C | -1.9044  | -0.72215 | 0.34137  |
| H | -2.10617 | -1.01365 | 1.37662  |
| H | -1.62188 | 0.58141  | 0.48259  |
| C | 0.74283  | 1.51024  | -0.61787 |
| H | 1.15391  | 2.46122  | -0.96449 |
| H | 0.02027  | 1.12067  | -1.3396  |
| O | 0.06911  | 1.70353  | 0.61555  |
| O | -1.2998  | 1.71596  | 0.38634  |
| O | 1.85975  | 0.67982  | -0.46108 |
| C | 1.83264  | -0.60176 | 0.02448  |
| O | 2.83356  | -1.25037 | -0.08835 |
| C | 0.58841  | -1.11795 | 0.71897  |
| H | 0.88952  | -2.06619 | 1.16385  |
| H | 0.3366   | -0.42512 | 1.52542  |
| C | -0.63207 | -1.31732 | -0.21299 |
| H | -0.78573 | -2.39285 | -0.37474 |
| H | -0.44845 | -0.90998 | -1.21446 |
| C | -3.108   | -0.73556 | -0.56436 |
| H | -3.4138  | -1.76706 | -0.78394 |
| H | -3.95956 | -0.22446 | -0.11043 |
| H | -2.8821  | -0.24854 | -1.51816 |

#### TS78

|   |          |          |          |
|---|----------|----------|----------|
| C | -0.12942 | -1.34829 | -0.09265 |
| O | -0.52363 | -1.91951 | 0.88757  |
| H | -0.03753 | 1.51644  | 0.44604  |
| C | -2.13914 | -0.14777 | -0.35446 |
| O | -0.93645 | -0.62769 | -0.92217 |
| H | -2.9081  | -0.15292 | -1.12747 |
| H | -2.40448 | -0.74825 | 0.51642  |
| C | 2.23984  | 1.06645  | -0.01281 |
| H | 2.72393  | 1.63817  | 0.78512  |
| H | 2.9257   | 1.10551  | -0.87441 |
| C | 1.31789  | -1.30779 | -0.51883 |
| H | 1.69398  | -2.33004 | -0.43904 |
| H | 1.40843  | -0.9777  | -1.55711 |
| C | 2.11374  | -0.39327 | 0.4411   |
| H | 3.12163  | -0.80059 | 0.55988  |
| H | 1.64194  | -0.43915 | 1.42856  |
| C | 0.9595   | 1.74398  | -0.43027 |
| H | 0.46379  | 1.32776  | -1.30879 |
| H | 0.99246  | 2.83366  | -0.44709 |
| O | -1.97642 | 1.20192  | -0.00662 |
| O | -1.03802 | 1.26369  | 1.01941  |

#### P1

|   |          |          |          |
|---|----------|----------|----------|
| C | -0.50932 | -0.19075 | 0.15371  |
| O | -0.49617 | -1.36823 | -0.11709 |
| O | -1.61307 | 0.55795  | 0.17892  |
| H | 1.52089  | -1.5533  | -0.55178 |
| C | 0.73203  | 0.6427   | 0.50017  |
| H | 0.54905  | 1.093    | 1.48515  |
| C | 0.97497  | 1.69399  | -0.52727 |
| H | 0.32864  | 2.55909  | -0.56866 |

|   |          |          |          |
|---|----------|----------|----------|
| H | 1.6612   | 1.47826  | -1.33312 |
| O | 2.16215  | -0.82092 | -0.53791 |
| O | 1.82927  | -0.21851 | 0.70868  |
| C | -2.82251 | -0.13042 | -0.15674 |
| H | -3.00357 | -0.94068 | 0.55194  |
| H | -3.61282 | 0.61514  | -0.10035 |
| H | -2.75188 | -0.54686 | -1.16319 |

#### P2

|   |          |          |          |
|---|----------|----------|----------|
| C | -1.12181 | -0.16852 | 0.22618  |
| O | -1.09204 | 0.72846  | 1.03219  |
| O | -2.21013 | -0.48573 | -0.48878 |
| C | -3.35696 | 0.32449  | -0.22749 |
| H | -3.13579 | 1.37271  | -0.43758 |
| H | -4.13883 | -0.04446 | -0.88854 |
| H | -3.65926 | 0.23131  | 0.81782  |
| C | 0.03545  | -1.09184 | -0.08908 |
| H | -0.09194 | -2.01442 | 0.48681  |
| H | 0.01663  | -1.36226 | -1.14801 |
| C | 1.36546  | -0.43095 | 0.27321  |
| H | 1.27982  | -0.02389 | 1.28931  |
| C | 2.53572  | -1.33903 | 0.14928  |
| H | 2.88663  | -1.9168  | 0.9937   |
| H | 2.98897  | -1.48132 | -0.8232  |
| O | 1.44926  | 0.65374  | -0.64871 |
| O | 2.49386  | 1.51116  | -0.2074  |
| H | 1.97894  | 2.21326  | 0.21873  |

#### P3

|   |          |          |          |
|---|----------|----------|----------|
| C | -1.20898 | -0.27348 | 0.23139  |
| O | -1.15729 | 0.69255  | 1.03618  |
| O | -2.29456 | -0.49414 | -0.4514  |
| C | -3.42877 | 0.36114  | -0.2872  |
| H | -3.09871 | 1.34539  | -0.02794 |
| H | -3.98172 | 0.39991  | -1.20242 |
| H | -4.05454 | -0.0219  | 0.49164  |
| C | 0.01247  | -1.19456 | 0.05455  |
| H | -0.04752 | -2.00425 | 0.75148  |
| H | 0.0253   | -1.58244 | -0.94258 |
| C | 1.30181  | -0.39202 | 0.3098   |
| H | 1.28898  | -0.00414 | 1.30694  |
| H | 1.3618   | 0.41767  | -0.38712 |
| C | 2.52326  | -1.3131  | 0.13296  |
| H | 2.53609  | -1.70098 | -0.86418 |
| C | 3.8126   | -0.51056 | 0.38821  |
| H | 4.2219   | -0.45546 | 1.37529  |
| H | 4.29913  | -0.00806 | -0.42153 |
| O | 2.44309  | -2.39521 | 1.06436  |
| O | 3.49005  | -3.1847  | 0.91279  |
| H | 3.43622  | -3.91115 | 1.53806  |

#### P4

|   |          |          |          |
|---|----------|----------|----------|
| C | 0.06352  | 0.86409  | -0.30286 |
| C | -1.08421 | -0.00288 | 0.1778   |
| O | -1.10086 | -0.60567 | 1.22385  |
| O | -2.11694 | 0.0231   | -0.67664 |
| C | -3.25826 | -0.72703 | -0.25936 |
| H | -2.99408 | -1.77892 | -0.1333  |
| C | 1.38109  | 0.21517  | 0.141    |
| H | 1.32414  | 0.04572  | 1.22433  |
| C | -0.10334 | 2.27161  | 0.27973  |
| H | 0.7002   | 2.92397  | -0.06941 |

|   |          |          |          |
|---|----------|----------|----------|
| H | -1.05987 | 2.70091  | -0.02695 |
| H | -3.64007 | -0.34431 | 0.68939  |
| C | 2.59377  | 0.99372  | -0.22289 |
| H | 3.17946  | 1.51538  | 0.52104  |
| H | 2.91692  | 1.00387  | -1.25655 |
| H | -0.07335 | 2.23481  | 1.37287  |
| H | 0.03541  | 0.90639  | -1.39636 |
| O | 1.35984  | -1.04954 | -0.52367 |
| H | -3.9986  | -0.60789 | -1.0481  |
| O | 2.38222  | -1.85385 | 0.04963  |
| H | 1.86038  | -2.40036 | 0.65719  |

#### P5

|   |          |          |          |
|---|----------|----------|----------|
| C | -0.93928 | -0.24733 | 0.20652  |
| C | 0.52987  | -0.49162 | -0.18832 |
| O | 0.90315  | -1.40135 | -0.88157 |
| O | 1.36338  | 0.39706  | 0.38718  |
| C | 2.75065  | 0.16033  | 0.1284   |
| H | 3.04144  | -0.82302 | 0.50265  |
| C | -1.16577 | -0.9736  | 1.48972  |
| H | -0.81534 | -0.5303  | 2.41252  |
| H | -1.49855 | -2.00214 | 1.47082  |
| C | -1.85808 | -0.71404 | -0.91395 |
| H | -2.89476 | -0.60835 | -0.5889  |
| H | -1.69248 | -0.10276 | -1.80232 |
| H | -1.64846 | -1.75684 | -1.15661 |
| O | -1.14227 | 1.12492  | 0.52279  |
| H | 2.94917  | 0.20195  | -0.94443 |
| H | 3.28938  | 0.94693  | 0.65321  |
| O | -0.72588 | 1.89815  | -0.59807 |
| H | 0.17826  | 2.122    | -0.32377 |

#### P6

|   |          |          |          |
|---|----------|----------|----------|
| C | -0.5719  | -0.16551 | 0.31115  |
| C | 0.85049  | -0.51548 | -0.16334 |
| O | 1.12408  | -1.49351 | -0.80939 |
| O | 1.76993  | 0.36578  | 0.2769   |
| C | 3.11885  | 0.03107  | -0.06385 |
| H | 3.38162  | -0.9426  | 0.35369  |
| C | -1.58494 | -0.57413 | -0.76348 |
| H | -1.31751 | -0.05798 | -1.68969 |
| H | 3.23851  | -0.00667 | -1.14834 |
| H | -1.46318 | -1.64578 | -0.94508 |
| O | -0.66398 | 1.21584  | 0.63385  |
| H | 3.7381   | 0.81506  | 0.36794  |
| C | -3.01121 | -0.22743 | -0.35318 |
| H | -3.29966 | -0.75264 | 0.56239  |
| H | -3.10234 | 0.84537  | -0.16856 |
| H | -3.71597 | -0.50441 | -1.14033 |
| C | -0.77832 | -0.87344 | 1.60876  |
| H | -1.0503  | -1.92024 | 1.60177  |
| H | -0.44584 | -0.40331 | 2.52481  |
| O | -0.32044 | 1.9621   | -0.5287  |
| H | 0.62201  | 2.121    | -0.3562  |

#### P7

|   |         |          |          |
|---|---------|----------|----------|
| C | 0.99519 | -0.55825 | -0.48627 |
| O | 1.24556 | -1.52781 | 0.27585  |
| O | 2.02903 | 0.3693   | -0.82648 |
| C | 2.96615 | 0.45462  | 0.25029  |

|   |          |          |          |
|---|----------|----------|----------|
| H | 3.3957   | -0.5094  | 0.42651  |
| H | 3.73972  | 1.14865  | -0.00427 |
| H | 2.46422  | 0.78844  | 1.13433  |
| C | -0.42456 | -0.37061 | -1.05256 |
| H | -0.99745 | 0.23802  | -0.38452 |
| H | -0.36704 | 0.10607  | -2.00879 |
| C | -1.10259 | -1.74499 | -1.20406 |
| C | -2.52234 | -1.55735 | -1.77035 |
| H | -2.46482 | -1.08067 | -2.72658 |
| H | -2.99344 | -2.51228 | -1.87562 |
| H | -3.09523 | -0.94872 | -1.10231 |
| C | -0.27806 | -2.62096 | -2.16554 |
| H | 0.78137  | -2.48799 | -2.23507 |
| H | -0.76459 | -3.36256 | -2.76404 |
| O | -1.17947 | -2.38204 | 0.07389  |
| O | -1.76063 | -3.56009 | -0.05598 |
| H | -1.81224 | -3.98776 | 0.80195  |

#### P8

|   |          |          |          |
|---|----------|----------|----------|
| C | -0.09627 | -0.21246 | -0.34291 |
| C | -1.55709 | -0.08688 | 0.12811  |
| O | -2.08731 | 1.04906  | 0.23799  |
| O | -2.31102 | -1.26111 | 0.44062  |
| C | -3.69518 | -1.02489 | 0.17006  |
| H | -4.04148 | -0.20875 | 0.76914  |
| H | -3.82045 | -0.78565 | -0.8653  |
| H | -0.07126 | -0.29517 | -1.40942 |
| H | 0.34531  | -1.08423 | 0.09289  |
| H | -4.25932 | -1.90351 | 0.40389  |
| C | 2.19939  | 0.9278   | 0.39501  |
| H | 2.67581  | 1.85897  | 0.16952  |
| H | 2.34047  | 0.69644  | 1.43013  |
| O | 2.77294  | -0.10768 | -0.40732 |
| C | 0.693    | 1.03571  | 0.09381  |
| H | 0.19473  | 1.97793  | 0.18796  |
| O | 4.06414  | -0.20018 | -0.14915 |
| H | 4.49158  | 0.63527  | -0.35146 |

#### P9

|   |          |          |          |
|---|----------|----------|----------|
| C | -1.0613  | 0.55248  | -0.07267 |
| O | -1.76492 | 1.54255  | -0.09016 |
| O | -1.55283 | -0.70421 | 0.0592   |
| C | -2.97114 | -0.77377 | 0.18132  |
| H | -3.45181 | -0.34762 | -0.70215 |
| H | -3.21197 | -1.83111 | 0.27758  |
| H | -3.30605 | -0.22056 | 1.06159  |
| C | 0.47379  | 0.55019  | -0.1954  |
| H | 0.76197  | -0.01711 | -1.05565 |
| C | 0.97921  | 1.99748  | -0.34203 |
| H | 0.55221  | 2.43725  | -1.21906 |
| H | 0.69075  | 2.56486  | 0.51807  |
| O | 2.40469  | 1.99538  | -0.45556 |
| O | 2.8385   | 3.23567  | -0.5816  |
| H | 3.79547  | 3.23426  | -0.65784 |

#### P10

|   |         |          |          |
|---|---------|----------|----------|
| C | 1.99352 | 0.09795  | -0.01377 |
| O | 1.91514 | 1.2807   | 0.20898  |
| O | 3.16077 | -0.56128 | -0.10249 |
| C | 4.3215  | 0.2482   | 0.08497  |
| H | 4.30497 | 0.71491  | 1.07215  |
| H | 5.17232 | -0.4243  | -0.00806 |

|   |          |          |          |
|---|----------|----------|----------|
| H | 4.3665   | 1.03341  | -0.67281 |
| C | -1.68215 | -0.9999  | -0.30409 |
| H | -2.91983 | 1.6102   | -0.83344 |
| C | -2.94866 | -0.84819 | 0.46193  |
| H | -3.77047 | -1.41015 | 0.00581  |
| H | -2.83336 | -1.17934 | 1.50462  |
| H | -1.65938 | -1.62331 | -1.19209 |
| O | -3.3342  | 0.51519  | 0.62696  |
| O | -3.66082 | 1.00877  | -0.67049 |
| C | 0.82188  | -0.82841 | -0.23683 |
| H | 0.94433  | -1.70371 | 0.40915  |
| H | 0.88612  | -1.20183 | -1.26609 |
| C | -0.51315 | -0.13086 | 0.01092  |
| H | -0.56784 | 0.21319  | 1.05042  |
| H | -0.5282  | 0.79123  | -0.5921  |

#### P11

|   |          |          |          |
|---|----------|----------|----------|
| C | 1.22028  | 0.0582   | -0.12692 |
| O | 1.48689  | 1.19795  | -0.46549 |
| O | 2.15681  | -0.84918 | 0.21856  |
| C | 3.49665  | -0.36679 | 0.16105  |
| H | 3.63209  | 0.47041  | 0.84979  |
| H | 4.12809  | -1.20554 | 0.4488   |
| H | 3.74018  | -0.02982 | -0.8491  |
| C | -0.12536 | -0.47108 | -0.04721 |
| H | -0.29809 | -1.47734 | 0.31091  |
| C | -1.30733 | 0.45542  | -0.38802 |
| H | -1.30417 | 1.29588  | 0.27419  |
| C | -2.62899 | -0.31878 | -0.22855 |
| H | -2.72736 | -0.65186 | 0.78351  |
| H | -3.44972 | 0.3222   | -0.47445 |
| H | -2.62821 | -1.16458 | -0.88392 |
| O | -1.18185 | 0.9114   | -1.73755 |
| O | -2.19105 | 1.71107  | -2.02809 |
| H | -2.16008 | 1.94063  | -2.95973 |

#### P12

|   |          |          |          |
|---|----------|----------|----------|
| C | -0.51619 | -0.40474 | 0.14565  |
| C | -1.91175 | 0.14514  | -0.04113 |
| O | -2.18614 | 1.26827  | -0.38334 |
| O | -2.83542 | -0.79599 | 0.21219  |
| C | -4.18687 | -0.37275 | 0.03357  |
| H | -4.41113 | 0.47375  | 0.68588  |
| H | -4.35815 | -0.07182 | -1.00232 |
| H | -0.37138 | -1.20338 | -0.59783 |
| H | -0.47109 | -0.92113 | 1.11438  |
| H | -4.80444 | -1.23123 | 0.2909   |
| C | 1.94328  | 0.31128  | 0.36246  |
| H | 2.0149   | -0.05878 | 1.3983   |
| C | 2.90133  | 1.47195  | 0.15463  |
| H | 3.92346  | 1.16516  | 0.38493  |
| H | 2.85248  | 1.81297  | -0.88353 |
| H | 2.63585  | 2.30627  | 0.80873  |
| C | 0.53219  | 0.64178  | 0.02906  |
| H | 0.27053  | 1.60366  | -0.3956  |
| O | 2.28088  | -0.79882 | -0.48869 |
| O | 3.49559  | -1.36013 | 0.00946  |
| H | 4.10792  | -1.13805 | -0.70618 |

#### P13

|   |          |       |          |
|---|----------|-------|----------|
| C | -1.59756 | 0.055 | -0.19268 |
| O | -1.65435 | 1.287 | 0.05739  |

|   |          |          |          |
|---|----------|----------|----------|
| O | -2.75512 | -0.63018 | -0.67795 |
| C | -3.93198 | 0.00123  | -0.16685 |
| H | -3.95905 | 1.02069  | -0.49069 |
| H | -4.79813 | -0.51146 | -0.52995 |
| H | -3.91936 | -0.03309 | 0.90253  |
| C | -0.28147 | -0.7148  | 0.0239   |
| H | -0.20709 | -1.73493 | -0.29027 |
| C | 1.01175  | 0.03293  | 0.39818  |
| H | 1.1914   | 0.81249  | -0.31239 |
| C | 2.19526  | -0.95238 | 0.38942  |
| H | 2.29868  | -1.37693 | -0.58729 |
| H | 2.01562  | -1.73194 | 1.09999  |
| C | 3.48849  | -0.20465 | 0.7637   |
| H | 3.38506  | 0.2199   | 1.74041  |
| H | 4.3108   | -0.88925 | 0.75761  |
| H | 3.66813  | 0.57491  | 0.05313  |
| O | 0.87353  | 0.60031  | 1.7035   |
| O | 1.98201  | 1.24122  | 2.02432  |
| H | 1.88922  | 1.62212  | 2.90062  |

#### P14

|   |          |          |          |
|---|----------|----------|----------|
| C | -1.43346 | -0.72567 | 0.16057  |
| O | -1.81037 | -1.29786 | -0.89493 |
| O | -2.25692 | 0.27546  | 0.76435  |
| C | -3.01577 | 0.94248  | -0.24765 |
| H | -3.6332  | 0.23223  | -0.75679 |
| H | -3.63193 | 1.69158  | 0.20413  |
| H | -2.34999 | 1.40273  | -0.94751 |
| C | -0.08538 | -1.10356 | 0.80206  |
| H | 0.68722  | -0.48114 | 0.40135  |
| H | -0.14274 | -0.96358 | 1.86131  |
| C | 0.23327  | -2.57877 | 0.49572  |
| H | 0.29063  | -2.71875 | -0.56353 |
| C | 1.58134  | -2.95666 | 1.1372   |
| H | 1.90183  | -2.47013 | 2.03469  |
| C | 2.46814  | -4.0348  | 0.48698  |
| H | 3.49634  | -3.82395 | 0.69494  |
| H | 2.21314  | -4.99445 | 0.88566  |
| H | 2.31111  | -4.03511 | -0.57143 |
| O | -0.79928 | -3.41061 | 1.03124  |
| O | -0.52615 | -4.67507 | 0.76867  |
| H | -1.21933 | -5.23351 | 1.12818  |

#### P15

|   |          |          |          |
|---|----------|----------|----------|
| C | -0.98618 | -0.42859 | -0.00777 |
| O | -1.33649 | -1.48696 | -0.46183 |
| O | -1.82691 | 0.541    | 0.36702  |
| C | -3.20933 | 0.2424   | 0.16531  |
| H | -3.49488 | -0.64057 | 0.74076  |
| H | -3.75599 | 1.11932  | 0.50642  |
| H | -3.40476 | 0.05242  | -0.89185 |
| C | 0.4671   | -0.01949 | 0.24226  |
| H | 0.57155  | 0.24347  | 1.30578  |
| C | 1.42212  | -1.08336 | -0.14761 |
| H | 1.13907  | -1.71903 | -0.97832 |
| C | 2.81876  | -1.08965 | 0.36313  |
| H | 2.87247  | -0.6871  | 1.37973  |
| H | 3.23902  | -2.09936 | 0.36292  |
| H | 3.47166  | -0.45911 | -0.25654 |
| O | 0.61896  | 1.19214  | -0.52103 |
| O | 1.8808   | 1.7432   | -0.15476 |
| H | 1.59623  | 2.54715  | 0.3041   |



**P16**

|   |          |          |          |
|---|----------|----------|----------|
| C | 0.88143  | -0.48974 | -0.20288 |
| O | 1.2369   | -1.43506 | -0.85871 |
| O | 1.71479  | 0.48583  | 0.2028   |
| H | 0.37017  | 2.15971  | -0.06994 |
| C | -0.55142 | -0.30234 | 0.30533  |
| C | -1.51943 | -0.5951  | -0.79652 |
| H | -1.18631 | -1.21357 | -1.61952 |
| O | -0.57176 | 1.95361  | -0.18371 |
| O | -0.74647 | 0.99449  | 0.8543   |
| C | 3.07658  | 0.30745  | -0.20026 |
| H | 3.15106  | 0.29642  | -1.28935 |
| H | 3.62299  | 1.15072  | 0.21781  |
| H | 3.46311  | -0.63562 | 0.18954  |
| C | -2.88133 | -0.00133 | -0.74652 |
| H | -3.32564 | -0.09164 | 0.25248  |
| H | -2.84562 | 1.07382  | -0.96885 |
| H | -3.55016 | -0.47863 | -1.46505 |
| C | -0.73921 | -1.23361 | 1.5137   |
| H | -1.7648  | -1.14331 | 1.87743  |
| H | -0.55247 | -2.26319 | 1.20465  |
| H | -0.04971 | -0.95771 | 2.31626  |

**P17**

|   |          |          |          |
|---|----------|----------|----------|
| C | 1.33105  | 0.03267  | -0.00565 |
| O | 1.57418  | 1.16408  | 0.3776   |
| O | 2.29626  | -0.88307 | -0.23784 |
| C | 3.62138  | -0.4233  | 0.01162  |
| H | 3.73517  | -0.13161 | 1.0584   |
| H | 4.27659  | -1.25939 | -0.22669 |
| H | 3.85379  | 0.43963  | -0.6166  |
| C | 0.00955  | -0.50117 | -0.27018 |
| H | -2.66853 | -2.24656 | -0.36045 |
| C | -1.22658 | 0.32704  | -0.08737 |
| H | -0.0802  | -1.53062 | -0.59133 |
| O | -2.36296 | -0.41969 | -0.53121 |
| O | -2.47116 | -1.57639 | 0.30813  |
| C | -1.22418 | 1.53878  | -1.02294 |
| H | -0.38164 | 2.18213  | -0.76701 |
| H | -1.13341 | 1.21641  | -2.06302 |
| H | -2.16024 | 2.08906  | -0.90205 |
| C | -1.40644 | 0.75579  | 1.37121  |
| H | -2.33536 | 1.325    | 1.46129  |
| H | -1.46373 | -0.11954 | 2.02056  |
| H | -0.56178 | 1.37728  | 1.67327  |

**P18**

|   |          |          |          |
|---|----------|----------|----------|
| C | -0.98126 | 0.4779   | -0.01969 |
| O | -1.66556 | 1.31315  | -0.57941 |
| O | -1.43553 | -0.75795 | 0.28306  |
| C | -2.78268 | -1.00606 | -0.10783 |
| H | -2.89426 | -0.89486 | -1.18875 |
| H | -2.99846 | -2.02881 | 0.19654  |
| H | -3.46018 | -0.30526 | 0.3856   |
| C | 0.39965  | 0.68511  | 0.4064   |
| H | 2.01256  | -0.69973 | -1.71763 |
| C | 1.19135  | -0.45222 | 0.97251  |
| H | 2.08455  | -0.08268 | 1.48892  |
| H | 0.58995  | -1.05773 | 1.6559   |
| O | 1.5819   | -1.38487 | -0.03135 |
| O | 2.50107  | -0.69745 | -0.88171 |

|   |         |         |          |
|---|---------|---------|----------|
| C | 1.03434 | 2.00664 | 0.16781  |
| H | 1.39246 | 2.44056 | 1.11003  |
| H | 1.91766 | 1.88078 | -0.47019 |
| H | 0.33224 | 2.69635 | -0.30034 |

P19

|   |          |          |          |
|---|----------|----------|----------|
| C | 1.15309  | 0.21945  | -0.01092 |
| O | 0.89384  | -0.53169 | 0.90463  |
| O | 2.38537  | 0.35098  | -0.50624 |
| C | 3.38043  | -0.47841 | 0.10098  |
| H | 3.11142  | -1.53079 | -0.00673 |
| H | 4.30773  | -0.26055 | -0.42485 |
| H | 3.4727   | -0.24268 | 1.16288  |
| C | 0.17348  | 1.1387   | -0.72362 |
| H | 0.25431  | 0.91327  | -1.79337 |
| H | 0.55998  | 2.15744  | -0.58887 |
| C | -1.2754  | 1.00678  | -0.21869 |
| C | -2.18499 | 1.962    | -1.01354 |
| H | -2.14917 | 1.70695  | -2.05208 |
| H | -1.84701 | 2.96862  | -0.88163 |
| C | -1.75731 | -0.4427  | -0.41457 |
| H | -1.21412 | -0.89357 | -1.21866 |
| H | -1.59056 | -0.99856 | 0.48438  |
| H | -2.80209 | -0.44307 | -0.64553 |
| O | -3.52917 | 1.84458  | -0.53996 |
| O | -4.25794 | 2.82799  | -1.03413 |
| H | -5.16052 | 2.7487   | -0.71686 |

P20

|   |          |          |          |
|---|----------|----------|----------|
| C | -0.93769 | -0.55312 | 0.18848  |
| O | -1.09887 | -1.63499 | 0.72069  |
| O | -1.92353 | 0.08581  | -0.48172 |
| C | -3.1655  | -0.61292 | -0.51271 |
| H | -3.55001 | -0.75623 | 0.49968  |
| H | -3.84283 | 0.00802  | -1.09655 |
| H | -3.04106 | -1.59259 | -0.97911 |
| C | 0.31224  | 0.20098  | 0.20253  |
| H | 2.48312  | -0.59544 | -1.74471 |
| C | 1.47697  | -0.44069 | 0.88664  |
| H | 2.12379  | 0.31355  | 1.35079  |
| H | 1.13276  | -1.16048 | 1.63312  |
| O | 2.25599  | -1.23765 | -0.00249 |
| O | 2.896    | -0.33799 | -0.90778 |
| C | 0.40703  | 1.56343  | -0.40089 |
| H | 1.45836  | 1.78878  | -0.59855 |
| H | -0.13349 | 1.58268  | -1.35283 |
| C | -0.19695 | 2.62967  | 0.53112  |
| H | -1.2553  | 2.42241  | 0.70561  |
| H | 0.31742  | 2.64049  | 1.49628  |
| H | -0.10613 | 3.62326  | 0.0857   |

P21

|   |          |          |          |
|---|----------|----------|----------|
| C | -1.32363 | 0.51084  | 0.0209   |
| O | -2.06199 | 1.44515  | 0.27052  |
| O | -1.79364 | -0.74215 | -0.22012 |
| C | -3.2121  | -0.86028 | -0.16414 |
| H | -3.68031 | -0.20274 | -0.89996 |
| H | -3.43477 | -1.90311 | -0.38488 |
| H | -3.5808  | -0.58958 | 0.82787  |
| C | 0.21168  | 0.59102  | -0.06864 |
| C | 0.66827  | 2.03267  | 0.22251  |
| H | 0.35004  | 2.31625  | 1.20395  |

|   |         |          |          |
|---|---------|----------|----------|
| C | 0.83674 | -0.36407 | 0.96513  |
| H | 1.89807 | -0.38918 | 0.83153  |
| H | 0.60958 | -0.01937 | 1.95228  |
| H | 0.43688 | -1.34729 | 0.82984  |
| C | 2.20391 | 2.11174  | 0.13794  |
| H | 2.49774 | 3.11688  | -0.08174 |
| H | 2.62852 | 1.81238  | 1.07334  |
| H | 2.55245 | 1.46091  | -0.63655 |
| O | 0.09159 | 2.91893  | -0.74024 |
| O | 0.58022 | 4.13323  | -0.56957 |
| H | 0.26477 | 4.70717  | -1.27148 |

#### P22

|   |          |          |          |
|---|----------|----------|----------|
| C | -0.96206 | -0.41132 | -0.52069 |
| O | -1.37011 | -1.49504 | -0.84761 |
| O | -1.7027  | 0.48689  | 0.15562  |
| H | -0.32421 | 1.89042  | 0.9083   |
| C | 0.45405  | 0.0777   | -0.8051  |
| H | 0.6192   | -0.075   | -1.88088 |
| C | 1.4825   | -0.67334 | -0.0153  |
| O | 0.62365  | 1.81387  | 0.71093  |
| O | 0.57716  | 1.49329  | -0.67583 |
| C | -3.0363  | 0.05857  | 0.44939  |
| H | -3.01592 | -0.83744 | 1.07271  |
| H | -3.5068  | 0.88624  | 0.97634  |
| H | -3.57094 | -0.16497 | -0.47518 |
| C | 2.89879  | -0.28399 | -0.27813 |
| H | 3.06978  | -0.06813 | -1.33718 |
| H | 3.15685  | 0.6276   | 0.28101  |
| H | 3.5899   | -1.07196 | 0.03605  |
| C | 1.1324   | -1.30039 | 1.29322  |
| H | 1.08253  | -0.53678 | 2.08464  |
| H | 0.16753  | -1.81527 | 1.25985  |
| H | 1.8918   | -2.03009 | 1.58907  |

#### P23

|   |          |          |          |
|---|----------|----------|----------|
| C | 0.76833  | -0.58659 | 0.15175  |
| O | 1.08702  | -1.71588 | -0.11909 |
| O | 1.63437  | 0.44261  | 0.17501  |
| H | 0.3377   | 2.01097  | -0.565   |
| C | -0.65496 | -0.17969 | 0.52463  |
| H | -0.8324  | -0.55384 | 1.5422   |
| C | -1.66506 | -0.81478 | -0.4356  |
| H | -1.47341 | -0.43198 | -1.44237 |
| O | -0.60942 | 1.80375  | -0.61754 |
| O | -0.80691 | 1.21385  | 0.66411  |
| C | 2.98529  | 0.08697  | -0.13682 |
| H | 3.04225  | -0.34227 | -1.13889 |
| H | 3.55745  | 1.01063  | -0.07671 |
| H | 3.35629  | -0.64503 | 0.58243  |
| C | -3.06616 | -0.53487 | -0.0245  |
| H | -3.34675 | -0.55084 | 1.0218   |
| H | -3.84382 | -0.38667 | -0.76027 |
| H | -1.44236 | -1.89189 | -0.45998 |

#### P24

|   |          |          |          |
|---|----------|----------|----------|
| C | -0.61373 | 0.68959  | 0.0006   |
| O | -1.10588 | 1.45316  | 0.7893   |
| O | -1.28857 | -0.35156 | -0.53592 |
| H | 0.05793  | -1.91316 | -0.71437 |
| C | 1.65101  | -0.14825 | 0.50144  |
| H | 1.70958  | 0.34731  | 1.47569  |

|   |          |          |          |
|---|----------|----------|----------|
| O | 0.97156  | -2.11298 | -0.44533 |
| O | 1.03737  | -1.38765 | 0.7794   |
| C | 0.82401  | 0.7243   | -0.47976 |
| H | 0.87513  | 0.2457   | -1.46272 |
| C | -2.62921 | -0.50564 | -0.05734 |
| H | -3.21197 | 0.38868  | -0.28335 |
| H | -3.03445 | -1.37147 | -0.5777  |
| H | -2.6255  | -0.66766 | 1.02193  |
| C | 1.34772  | 2.11607  | -0.51917 |
| H | 0.93752  | 2.85387  | 0.15713  |
| H | 2.23819  | 2.34575  | -1.08799 |
| H | 2.65899  | -0.29315 | 0.0972   |

#### P25

|   |          |          |          |
|---|----------|----------|----------|
| C | -1.39845 | -0.68537 | 0.19126  |
| O | -1.828   | -1.35206 | -0.78577 |
| O | -2.24528 | 0.27363  | 0.83009  |
| C | -3.16588 | 0.80769  | -0.12498 |
| H | -3.76314 | 0.01571  | -0.52617 |
| H | -3.79952 | 1.52527  | 0.35303  |
| H | -2.62384 | 1.28171  | -0.91643 |
| C | 0.03918  | -0.90227 | 0.69897  |
| H | 0.70298  | -0.2393  | 0.18444  |
| H | 0.0802   | -0.70362 | 1.74956  |
| C | 0.46242  | -2.35928 | 0.43513  |
| H | -0.20138 | -3.02225 | 0.94966  |
| C | 1.90005  | -2.57618 | 0.94283  |
| H | 1.94107  | -2.37752 | 1.99342  |
| H | 2.56385  | -1.9132  | 0.4283   |
| C | 2.32329  | -4.03318 | 0.67899  |
| H | 2.14004  | -4.78559 | 1.41737  |
| H | 2.8006   | -4.2931  | -0.2427  |
| O | 0.4076   | -2.62477 | -0.96894 |
| O | 0.77037  | -3.87363 | -1.19509 |
| H | 0.73357  | -4.05186 | -2.13768 |

#### P26

|   |          |          |          |
|---|----------|----------|----------|
| C | 0.83939  | -0.51288 | -0.15925 |
| O | 1.14169  | -1.51185 | -0.76065 |
| O | 1.73625  | 0.4096   | 0.23909  |
| H | 0.54555  | 2.16586  | -0.23648 |
| C | -0.59028 | -0.18778 | 0.27792  |
| C | -1.55783 | -0.51103 | -0.87231 |
| H | -1.22952 | 0.06874  | -1.74802 |
| O | -0.39719 | 2.00701  | -0.4056  |
| O | -0.70814 | 1.16135  | 0.69737  |
| C | 3.09199  | 0.10291  | -0.10109 |
| H | 3.19834  | 0.00497  | -1.1831  |
| H | 3.68834  | 0.93223  | 0.27462  |
| H | 3.395    | -0.83441 | 0.36901  |
| C | -2.96645 | -0.18373 | -0.52291 |
| H | -3.18639 | 0.76604  | -0.05143 |
| H | -3.78549 | -0.76072 | -0.93095 |
| H | -1.43454 | -1.56596 | -1.13216 |
| C | -0.89355 | -0.99637 | 1.53797  |
| H | -0.78033 | -2.06086 | 1.32277  |
| H | -0.21046 | -0.71299 | 2.34211  |
| H | -1.92108 | -0.79849 | 1.84993  |

#### P27

|   |          |         |          |
|---|----------|---------|----------|
| C | -1.00113 | 0.6369  | -0.05756 |
| O | -1.38426 | 1.13598 | 1.03226  |

|   |          |          |          |
|---|----------|----------|----------|
| O | -1.94285 | -0.00854 | -0.91865 |
| C | -2.9928  | -0.57988 | -0.13374 |
| H | -3.48579 | 0.19249  | 0.41881  |
| H | -3.69744 | -1.06282 | -0.77805 |
| H | -2.58077 | -1.29681 | 0.54535  |
| C | 0.48189  | 0.72121  | -0.46393 |
| H | 0.55819  | 0.75199  | -1.53076 |
| C | 1.10582  | 1.99666  | 0.13234  |
| H | 0.58521  | 2.85505  | -0.23785 |
| C | 2.58884  | 2.08098  | -0.27403 |
| H | 2.66513  | 2.11176  | -1.34086 |
| H | 3.02235  | 2.96717  | 0.14027  |
| H | 3.10945  | 1.2226   | 0.09617  |
| C | 1.23118  | -0.51422 | 0.06888  |
| H | 1.68093  | -0.48975 | 1.03946  |
| H | 1.30205  | -1.39706 | -0.53151 |
| O | 1.00385  | 1.95554  | 1.55811  |
| O | 1.53865  | 3.04878  | 2.0692   |
| H | 1.47019  | 3.02117  | 3.02635  |

#### P28

|   |          |          |          |
|---|----------|----------|----------|
| C | 0.79573  | -0.20801 | -0.21188 |
| O | 0.44453  | -1.29994 | -0.72948 |
| O | 1.96698  | -0.09863 | 0.34454  |
| C | -0.16057 | 0.99883  | -0.23692 |
| C | 2.85498  | -1.21926 | 0.3678   |
| H | 3.46837  | -1.20652 | -0.50883 |
| H | 3.47526  | -1.16481 | 1.23796  |
| H | 2.28574  | -2.12496 | 0.39167  |
| C | 0.08473  | 1.82172  | -1.51531 |
| H | -0.4609  | 1.59839  | -2.40824 |
| H | 0.80078  | 2.61679  | -1.51062 |
| C | 0.09464  | 1.88175  | 0.99876  |
| H | 1.10684  | 2.22844  | 0.98649  |
| H | -0.56981 | 2.72027  | 0.98136  |
| H | -0.0758  | 1.31     | 1.88699  |
| C | -1.61739 | 0.49985  | -0.21926 |
| H | -1.78782 | -0.0719  | 0.66897  |
| H | -1.79471 | -0.11361 | -1.07782 |
| O | -2.50539 | 1.62048  | -0.24252 |
| O | -3.75408 | 1.19279  | -0.22739 |
| H | -4.35022 | 1.9451   | -0.243   |

#### P29

|   |          |          |          |
|---|----------|----------|----------|
| C | 1.00681  | 0.26583  | 0.20643  |
| O | 0.77565  | -0.80389 | 0.75438  |
| O | 2.19692  | 0.54852  | -0.34658 |
| C | 3.15765  | -0.50411 | -0.27769 |
| H | 2.78023  | -1.39672 | -0.78105 |
| H | 4.04749  | -0.12655 | -0.77783 |
| H | 3.37652  | -0.75314 | 0.76283  |
| C | 0.06724  | 1.36387  | 0.09245  |
| H | 0.38607  | 2.24659  | -0.44909 |
| C | -1.36868 | 1.21379  | 0.62837  |
| H | -1.33854 | 1.02495  | 1.68114  |
| H | -1.85065 | 0.39687  | 0.13314  |
| C | -2.1543  | 2.51123  | 0.36185  |
| H | -2.19438 | 2.6939   | -0.69168 |
| H | -1.66589 | 3.33008  | 0.84749  |
| O | -3.48299 | 2.37754  | 0.87333  |
| O | -4.15688 | 3.48942  | 0.64529  |
| H | -5.04883 | 3.39971  | 0.98876  |

**P30**

|   |          |          |          |
|---|----------|----------|----------|
| C | 1.45873  | 0.20314  | -0.07453 |
| O | 0.93281  | -0.88711 | -0.03514 |
| O | 2.78208  | 0.36678  | -0.00032 |
| C | 3.54057  | -0.83872 | 0.13307  |
| H | 3.36656  | -1.49127 | -0.72456 |
| H | 4.58276  | -0.52931 | 0.17748  |
| H | 3.25407  | -1.36792 | 1.04382  |
| C | 0.74188  | 1.54041  | -0.19207 |
| H | 1.23803  | 2.10236  | -0.98903 |
| H | 0.96031  | 2.07881  | 0.74129  |
| C | -0.77357 | 1.39517  | -0.42428 |
| H | -0.94514 | 0.82781  | -1.3151  |
| C | -1.40592 | 2.79124  | -0.57505 |
| H | -0.97388 | 3.28936  | -1.41774 |
| H | -1.22227 | 3.36347  | 0.31023  |
| C | -2.92439 | 2.6468   | -0.78713 |
| H | -3.35677 | 2.15079  | 0.05662  |
| H | -3.10803 | 2.07256  | -1.67111 |
| O | -3.51111 | 3.94301  | -0.93029 |
| O | -4.81528 | 3.82077  | -1.09343 |
| H | -5.20921 | 4.69097  | -1.18918 |

**P31**

|   |          |          |          |
|---|----------|----------|----------|
| C | -0.93124 | -0.42115 | 0.19349  |
| O | -1.02563 | -0.05297 | 1.34394  |
| O | -1.98188 | -0.58291 | -0.61301 |
| C | -3.24544 | -0.24307 | -0.03446 |
| H | -3.24328 | 0.8012   | 0.28323  |
| H | -3.98397 | -0.40899 | -0.81602 |
| H | -3.4479  | -0.87728 | 0.83054  |
| H | 0.63079  | 1.26703  | 1.38201  |
| C | 0.74967  | 0.67573  | -1.20789 |
| H | 1.80574  | 0.66956  | -1.50137 |
| H | 0.1236   | 0.82707  | -2.09274 |
| O | 0.4596   | 1.79602  | -0.40086 |
| O | 1.25782  | 1.70298  | 0.77473  |
| C | 1.42393  | -1.17121 | 0.43178  |
| H | 1.17145  | -1.21877 | 1.48438  |
| C | 0.3841   | -0.66734 | -0.5166  |
| H | 0.21411  | -1.39107 | -1.32755 |
| C | 2.84562  | -1.28239 | 0.00659  |
| H | 3.36858  | -0.31923 | 0.10806  |
| H | 3.38815  | -2.00946 | 0.61624  |
| H | 2.93357  | -1.58844 | -1.04272 |

**P32**

|   |          |          |          |
|---|----------|----------|----------|
| C | 1.38857  | -0.27654 | -0.20299 |
| O | 1.21127  | 0.80811  | -0.74234 |
| O | 2.56861  | -0.62653 | 0.33355  |
| C | 3.58271  | 0.37421  | 0.26035  |
| H | 3.26372  | 1.27787  | 0.78407  |
| H | 4.46028  | -0.05788 | 0.73754  |
| H | 3.79474  | 0.62717  | -0.78063 |
| H | -0.44507 | 1.622    | -0.54771 |
| C | -1.89079 | -0.43505 | 0.46322  |
| H | -1.86323 | -1.01731 | 1.39325  |
| O | -1.33693 | 0.80566  | 0.87143  |
| O | -1.37125 | 1.69526  | -0.24291 |
| C | 0.39276  | -1.32238 | -0.08192 |
| H | 0.67233  | -2.21978 | 0.4573   |

|   |          |          |          |
|---|----------|----------|----------|
| C | -0.98564 | -1.11709 | -0.58916 |
| H | -1.43666 | -2.07443 | -0.86755 |
| H | -0.96945 | -0.47138 | -1.47319 |
| C | -3.32367 | -0.28965 | -0.02315 |
| H | -3.76606 | -1.27101 | -0.21448 |
| H | -3.91712 | 0.22346  | 0.73648  |
| H | -3.35071 | 0.30036  | -0.94092 |

### P33

|   |          |          |          |
|---|----------|----------|----------|
| C | 1.33417  | -0.23126 | 0.47444  |
| O | 1.80799  | -0.80134 | 1.42499  |
| O | 2.01756  | -0.05238 | -0.79631 |
| C | 3.34127  | -0.58794 | -0.84422 |
| H | 3.32137  | -1.66458 | -0.66314 |
| H | 3.7135   | -0.37081 | -1.84339 |
| H | 3.96911  | -0.11514 | -0.08629 |
| C | -0.10396 | 0.3184   | 0.4391   |
| H | -0.67653 | -0.22674 | -0.28193 |
| C | -0.74736 | 0.16264  | 1.82956  |
| H | -0.79843 | -0.87524 | 2.0847   |
| H | -0.15614 | 0.67985  | 2.5561   |
| C | -2.16817 | 0.75627  | 1.80716  |
| H | -2.7563  | 0.24619  | 1.07311  |
| C | -2.81728 | 0.58667  | 3.19334  |
| H | -2.22823 | 1.09531  | 3.92765  |
| H | -3.80383 | 1.00066  | 3.17826  |
| H | -2.87078 | -0.45379 | 3.43724  |
| O | -0.07672 | 1.70199  | 0.07877  |
| O | -0.84719 | 1.89814  | -0.97494 |
| H | -0.82636 | 2.82641  | -1.21882 |

### P34

|   |          |          |          |
|---|----------|----------|----------|
| C | -1.80604 | -0.02733 | -0.12931 |
| O | -1.98342 | 0.83799  | -0.94604 |
| O | -2.80983 | -0.74168 | 0.41496  |
| C | -4.11475 | -0.4053  | -0.05263 |
| H | -4.18526 | -0.56287 | -1.12964 |
| H | -4.7975  | -1.06463 | 0.47695  |
| H | -4.34018 | 0.63896  | 0.16747  |
| C | -0.50905 | -0.42351 | 0.38293  |
| H | -0.47009 | -1.20068 | 1.13785  |
| C | 0.71493  | 0.29896  | -0.05681 |
| H | 0.61147  | 0.53453  | -1.1213  |
| C | 1.9324   | -0.59555 | 0.13908  |
| H | 2.09561  | -0.80628 | 1.20388  |
| H | 1.81984  | -1.54234 | -0.40059 |
| C | 0.8535   | 1.62702  | 0.71275  |
| H | -0.02091 | 2.2532   | 0.53206  |
| H | 0.93887  | 1.43794  | 1.78627  |
| H | 1.74569  | 2.16013  | 0.38269  |
| O | 3.04438  | 0.10559  | -0.37315 |
| O | 4.16185  | -0.76153 | -0.15791 |
| H | 4.87268  | -0.21672 | -0.51465 |

### P35

|   |          |          |          |
|---|----------|----------|----------|
| C | -1.12784 | -0.166   | 0.34811  |
| O | -1.63993 | 0.41171  | 1.34189  |
| O | -1.96525 | -0.82313 | -0.60678 |
| C | -3.23163 | -0.16151 | -0.66534 |
| H | -3.0884  | 0.85762  | -0.95817 |
| H | -3.85823 | -0.65321 | -1.37984 |
| H | -3.69585 | -0.19389 | 0.29817  |

|   |          |          |          |
|---|----------|----------|----------|
| C | 0.40066  | -0.16532 | 0.16031  |
| H | 0.68904  | 0.69007  | -0.41418 |
| C | 1.0871   | -0.11366 | 1.53789  |
| H | 0.79872  | -0.96905 | 2.11239  |
| C | 2.6156   | -0.11297 | 1.35009  |
| H | 3.15102  | -1.0388  | 1.31737  |
| H | 3.1422   | 0.81333  | 1.25231  |
| C | 0.66008  | 1.16845  | 2.27644  |
| H | 0.94846  | 2.02384  | 1.70195  |
| H | -0.40194 | 1.16797  | 2.40693  |
| H | 1.13701  | 1.20435  | 3.2336   |
| O | 0.79719  | -1.35585 | -0.52549 |
| O | 2.10733  | -1.35526 | -0.68647 |
| H | 2.37353  | -2.15449 | -1.14686 |

P36

|   |          |          |          |
|---|----------|----------|----------|
| C | 1.14707  | 0.05423  | 0.54545  |
| O | 0.82468  | -0.99869 | 1.15454  |
| O | 2.49443  | 0.24099  | 0.10425  |
| C | 3.08155  | -1.03024 | -0.18583 |
| H | 2.51843  | -1.51599 | -0.95514 |
| H | 4.08971  | -0.8905  | -0.51596 |
| H | 3.07584  | -1.63544 | 0.69655  |
| C | 0.09061  | 1.14163  | 0.27518  |
| C | 0.45265  | 2.38904  | -0.55217 |
| H | 1.26156  | 2.15641  | -1.21282 |
| H | -0.39769 | 2.69685  | -1.12407 |
| H | 0.74564  | 3.18055  | 0.10552  |
| C | -1.38188 | 0.90826  | 0.66108  |
| H | -1.88116 | 0.39267  | -0.13251 |
| H | -1.42774 | 0.31949  | 1.55335  |
| C | -2.06976 | 2.26434  | 0.90495  |
| H | -2.02389 | 2.8531   | 0.01268  |
| H | -1.57048 | 2.77993  | 1.69854  |
| O | -3.43707 | 2.04763  | 1.26329  |
| O | -4.02668 | 3.20998  | 1.47232  |
| H | -4.94459 | 3.0645   | 1.71288  |

P37

|   |          |          |          |
|---|----------|----------|----------|
| C | 1.10099  | -0.26282 | 0.4681   |
| O | 1.18886  | -1.17405 | 1.33152  |
| O | 2.17995  | -0.03371 | -0.44199 |
| C | 2.86921  | -1.26318 | -0.68332 |
| H | 2.19132  | -1.97513 | -1.1058  |
| H | 3.67654  | -1.09175 | -1.36429 |
| H | 3.25551  | -1.6426  | 0.23956  |
| C | -0.16849 | 0.6056   | 0.39155  |
| H | -0.87129 | 0.15191  | -0.27564 |
| C | -0.79455 | 0.72429  | 1.79354  |
| H | -1.05028 | -0.2503  | 2.15363  |
| H | -0.09175 | 1.17798  | 2.46074  |
| C | -2.06403 | 1.59271  | 1.717    |
| H | -1.8083  | 2.56731  | 1.35691  |
| H | -2.76683 | 1.13903  | 1.0498   |
| C | -2.69009 | 1.71141  | 3.11899  |
| H | -2.39924 | 2.5101   | 3.76891  |
| H | -3.41591 | 0.99518  | 3.44317  |
| O | 0.17328  | 1.90809  | -0.08969 |
| O | -0.91485 | 2.65245  | -0.1553  |
| H | -0.68541 | 3.52685  | -0.47837 |

P38



|   |          |          |          |
|---|----------|----------|----------|
| C | -1.34786 | 0.39135  | 0.03966  |
| O | -1.82692 | 1.30106  | 0.66806  |
| O | -2.073   | -0.66311 | -0.38288 |
| H | 3.14066  | -1.66769 | 1.053    |
| C | 0.60177  | -1.13885 | 0.00773  |
| H | 0.02953  | -1.89847 | -0.53113 |
| O | 2.78352  | -0.8496  | 0.67717  |
| O | 1.95008  | -1.38149 | -0.35284 |
| C | -3.45827 | -0.61412 | -0.03975 |
| H | -3.93069 | 0.25986  | -0.493   |
| H | -3.89456 | -1.53218 | -0.429   |
| H | -3.58067 | -0.55586 | 1.04367  |
| H | 0.48456  | -1.30472 | 1.08589  |
| C | 0.10657  | 0.26185  | -0.38279 |
| H | 0.11386  | 0.31721  | -1.48012 |
| C | 0.94492  | 1.4161   | 0.17884  |
| H | 0.30964  | 2.30703  | 0.22817  |
| H | 1.20616  | 1.18358  | 1.224    |
| C | 2.16635  | 1.70083  | -0.62728 |
| H | 2.71036  | 2.6219   | -0.4583  |
| H | 2.66086  | 0.91156  | -1.17772 |

### P39

|   |          |          |          |
|---|----------|----------|----------|
| C | -0.86568 | 0.00093  | 0.44587  |
| O | -1.49176 | -0.30786 | 1.49289  |
| O | -0.45116 | -1.01921 | -0.46648 |
| C | -1.37222 | -2.11165 | -0.41057 |
| H | -2.34939 | -1.76841 | -0.67931 |
| H | -1.06206 | -2.87497 | -1.09324 |
| H | -1.3944  | -2.50899 | 0.58267  |
| C | -0.54592 | 1.47744  | 0.14708  |
| H | -1.34564 | 1.9082   | -0.41841 |
| C | -0.38215 | 2.24545  | 1.47182  |
| H | -1.29026 | 2.18395  | 2.03436  |
| H | 0.41757  | 1.81469  | 2.03731  |
| C | -0.06238 | 3.72196  | 1.17303  |
| H | -0.86211 | 4.15273  | 0.60754  |
| H | 0.84573  | 3.78346  | 0.61049  |
| C | 0.76108  | 1.56595  | -0.66256 |
| H | 1.39331  | 2.42375  | -0.56579 |
| H | 1.03697  | 0.76965  | -1.32187 |
| O | 0.08969  | 4.43512  | 2.40315  |
| O | 0.36377  | 5.7007   | 2.14704  |
| H | 0.46586  | 6.17946  | 2.97285  |

### P40

|   |          |          |          |
|---|----------|----------|----------|
| C | 1.44709  | 0.26493  | 0.12793  |
| O | 0.86959  | -0.85249 | 0.16587  |
| O | 2.84041  | 0.36049  | 0.43524  |
| C | 3.49305  | -0.85942 | 0.07361  |
| H | 3.37017  | -1.03236 | -0.97515 |
| H | 4.5356   | -0.78793 | 0.30355  |
| H | 3.06172  | -1.67079 | 0.62183  |
| C | 0.65333  | 1.5295   | -0.24945 |
| H | 1.12069  | 2.48926  | -0.17641 |
| C | -0.8745  | 1.47042  | -0.43343 |
| H | -1.10791 | 0.87012  | -1.28787 |
| H | -1.32229 | 1.04008  | 0.43788  |
| C | -1.42191 | 2.8947   | -0.64171 |
| H | -1.1885  | 3.495    | 0.21273  |
| H | -0.97412 | 3.32504  | -1.51302 |
| C | -2.94974 | 2.83563  | -0.82569 |

|   |          |         |          |
|---|----------|---------|----------|
| H | -3.18315 | 2.23533 | -1.68012 |
| H | -3.39753 | 2.40529 | 0.04563  |
| O | -3.45805 | 4.15817 | -1.01908 |
| O | -4.76762 | 4.10754 | -1.17678 |
| H | -5.10886 | 4.9954  | -1.30661 |

P41

|   |          |          |          |
|---|----------|----------|----------|
| C | 0.54186  | 0.62303  | 0.01674  |
| O | 1.39857  | 1.39478  | 0.34749  |
| O | 0.76621  | -0.69429 | -0.23766 |
| H | -1.19235 | -1.5614  | 0.40578  |
| O | -1.86243 | -0.89098 | 0.61548  |
| O | -1.75714 | -0.05165 | -0.52927 |
| C | 2.05948  | -1.13878 | -0.14286 |
| H | 2.14423  | -2.2122  | -0.18937 |
| H | 2.78176  | -0.47986 | 0.31343  |
| C | -0.91403 | 1.00925  | -0.17791 |
| H | -0.96525 | 1.71971  | -1.00886 |
| H | -1.25392 | 1.50993  | 0.73489  |

P42

|   |          |          |          |
|---|----------|----------|----------|
| C | 0.51798  | -0.51454 | -0.27352 |
| O | 1.09272  | -1.43487 | -0.78756 |
| O | 1.15164  | 0.49578  | 0.38273  |
| C | 2.51591  | 0.41902  | 0.48784  |
| H | 2.96406  | 1.32633  | 0.85902  |
| H | 3.02348  | -0.32154 | -0.11069 |
| C | -1.01497 | -0.36907 | -0.25136 |
| H | -1.29126 | 0.56323  | -0.69787 |
| C | -1.65192 | -1.5262  | -1.04316 |
| H | -2.71624 | -1.41607 | -1.04163 |
| H | -1.29299 | -1.5088  | -2.05101 |
| H | -1.38908 | -2.45772 | -0.58698 |
| O | -1.47773 | -0.40549 | 1.10121  |
| O | -2.6671  | 0.16222  | 1.17542  |
| H | -3.00138 | 0.08972  | 2.07241  |

P43

|   |          |          |          |
|---|----------|----------|----------|
| C | -0.9132  | 0.15935  | 0.07164  |
| O | -1.38708 | 1.10765  | 0.64454  |
| O | -1.64205 | -0.89252 | -0.36588 |
| C | -2.99758 | -0.8589  | -0.17086 |
| H | -3.47854 | -1.79675 | -0.397   |
| H | -3.38614 | -0.11835 | 0.5112   |
| C | 0.57647  | -0.02028 | -0.27508 |
| H | 0.68958  | -0.09075 | -1.33675 |
| C | 1.37448  | 1.18893  | 0.24703  |
| H | 1.0106   | 2.0828   | -0.21499 |
| H | 1.25702  | 1.26257  | 1.30802  |
| C | 2.86527  | 1.00562  | -0.0929  |
| H | 2.98254  | 0.9303   | -1.15378 |
| H | 3.41949  | 1.84658  | 0.26839  |
| H | 3.22958  | 0.11263  | 0.37051  |
| O | 1.06755  | -1.21572 | 0.33701  |
| O | 1.69378  | -1.94765 | -0.56551 |
| H | 2.03756  | -2.74243 | -0.1511  |

P44

|   |          |          |          |
|---|----------|----------|----------|
| C | -1.12582 | -0.61988 | 0.32158  |
| O | -1.28206 | -1.67447 | 0.87399  |
| O | -2.05449 | -0.06061 | -0.50354 |
| C | -3.20481 | -0.77168 | -0.72613 |

|   |          |          |          |
|---|----------|----------|----------|
| H | -3.95933 | -0.20529 | -1.24747 |
| H | -3.40128 | -1.6185  | -0.08687 |
| C | 0.15194  | 0.23112  | 0.44302  |
| H | -0.09989 | 1.20117  | 0.81783  |
| C | 1.13485  | -0.45383 | 1.41066  |
| H | 1.39642  | -1.41882 | 1.02952  |
| H | 0.67361  | -0.5623  | 2.37003  |
| C | 2.40513  | 0.4062   | 1.54608  |
| H | 2.8642   | 0.51796  | 0.58605  |
| H | 2.14407  | 1.36985  | 1.93094  |
| C | 3.39041  | -0.28156 | 2.5093   |
| H | 3.65196  | -1.24495 | 2.12412  |
| H | 4.27274  | 0.3163   | 2.60389  |
| H | 2.9311   | -0.3939  | 3.46916  |
| O | 0.76226  | 0.36094  | -0.84366 |
| O | 0.82861  | 1.63744  | -1.17311 |
| H | 1.22888  | 1.72393  | -2.04138 |

P45

|   |          |          |          |
|---|----------|----------|----------|
| C | 0.59101  | -0.51704 | -0.19991 |
| O | 0.96398  | -1.45737 | -0.84675 |
| O | 1.44314  | 0.38055  | 0.37235  |
| H | 0.27393  | 2.18608  | -0.26616 |
| O | -0.62272 | 1.95683  | -0.55795 |
| O | -1.03658 | 1.1326   | 0.52727  |
| C | 2.78623  | 0.15714  | 0.21894  |
| H | 3.39322  | 0.98764  | 0.5413   |
| H | 3.09175  | -0.58795 | -0.49949 |
| C | -0.87041 | -0.22204 | 0.14136  |
| C | -1.22543 | -1.0118  | 1.40127  |
| H | -2.26157 | -0.79983 | 1.67415  |
| H | -1.11478 | -2.08077 | 1.20849  |
| H | -0.57361 | -0.72171 | 2.22845  |
| C | -1.75862 | -0.58539 | -1.04031 |
| H | -1.59615 | -1.62585 | -1.32526 |
| H | -2.80319 | -0.43977 | -0.75645 |
| H | -1.52893 | 0.05599  | -1.89243 |

P46

|   |          |          |          |
|---|----------|----------|----------|
| C | 0.89767  | -0.53685 | -0.19906 |
| O | 1.16612  | -1.52497 | -0.82651 |
| O | 1.83859  | 0.35609  | 0.22303  |
| H | 0.67742  | 2.18352  | -0.30272 |
| O | -0.26056 | 1.99975  | -0.47129 |
| O | -0.56883 | 1.1972   | 0.66398  |
| C | 3.14317  | 0.09775  | -0.10781 |
| H | 3.84169  | 0.74119  | 0.40313  |
| H | 3.37707  | -0.88762 | -0.48105 |
| C | -0.50697 | -0.16674 | 0.27828  |
| C | -0.76639 | -0.92316 | 1.58207  |
| H | -1.72538 | -0.60987 | 1.99831  |
| H | -0.78734 | -1.99726 | 1.38657  |
| H | 0.01778  | -0.70148 | 2.30961  |
| C | -1.51579 | -0.49547 | -0.82777 |
| H | -1.39572 | -1.55086 | -1.08797 |
| H | -1.23681 | 0.08613  | -1.71086 |
| C | -2.95293 | -0.17686 | -0.42985 |
| H | -3.61695 | -0.28601 | -1.2901  |
| H | -3.31821 | -0.84599 | 0.35411  |
| H | -3.02868 | 0.85171  | -0.06787 |

P47

|   |          |          |          |
|---|----------|----------|----------|
| O | -1.24663 | 1.34211  | 0.02912  |
| O | -2.24661 | -0.6805  | -0.00444 |
| C | -3.48626 | -0.10109 | 0.0216   |
| H | -3.54749 | 0.96198  | -0.1542  |
| H | -4.28247 | -0.80204 | -0.17034 |
| C | -1.16648 | 0.14196  | 0.01479  |
| C | 0.11058  | -0.65434 | 0.01592  |
| H | 0.12463  | -1.29443 | 0.90424  |
| H | 0.11577  | -1.32304 | -0.85031 |
| C | 1.31754  | 0.26616  | -0.00856 |
| H | 1.3292   | 0.87576  | -0.91767 |
| H | 1.31468  | 0.94032  | 0.85674  |
| O | 2.44507  | -0.58931 | 0.02199  |
| O | 3.58879  | 0.24256  | -0.1327  |
| H | 3.96842  | 0.2063   | 0.75733  |

P48

|   |          |          |          |
|---|----------|----------|----------|
| C | 0.98881  | -0.67677 | -0.21831 |
| O | 1.41908  | -1.35982 | 0.74702  |
| O | 1.84816  | 0.26358  | -0.86804 |
| C | 2.80003  | 0.76827  | 0.07225  |
| H | 3.18751  | 1.75949  | -0.03839 |
| H | 3.12478  | 0.15468  | 0.88647  |
| C | -0.46322 | -0.85354 | -0.69995 |
| H | -1.09983 | -0.17651 | -0.16961 |
| H | -0.5187  | -0.64798 | -1.74855 |
| C | -0.91915 | -2.30056 | -0.43567 |
| H | -0.28254 | -2.97759 | -0.96601 |
| C | -2.37118 | -2.47733 | -0.91731 |
| H | -2.68796 | -3.48274 | -0.73369 |
| H | -3.00779 | -1.80031 | -0.38697 |
| H | -2.42665 | -2.27178 | -1.96592 |
| O | -0.84501 | -2.57527 | 0.96573  |
| O | -1.23581 | -3.81558 | 1.19225  |
| H | -1.18603 | -4.      | 2.13306  |

P49

|   |          |          |          |
|---|----------|----------|----------|
| C | 1.21652  | -0.84534 | -0.08268 |
| O | 1.65172  | -1.69319 | 0.64588  |
| O | 1.9796   | 0.19643  | -0.54525 |
| C | 3.27718  | 0.27136  | -0.10876 |
| H | 3.86746  | 0.98747  | -0.65788 |
| H | 3.67781  | -0.58713 | 0.40793  |
| C | -0.23657 | -0.73217 | -0.57999 |
| H | -0.67004 | 0.17411  | -0.21167 |
| H | -0.24775 | -0.72379 | -1.6499  |
| C | -1.0497  | -1.93542 | -0.06754 |
| H | -0.60569 | -2.8425  | -0.42103 |
| C | -2.49626 | -1.8358  | -0.58631 |
| H | -2.49274 | -1.84294 | -1.65628 |
| H | -2.93854 | -0.9262  | -0.23716 |
| C | -3.31134 | -3.03507 | -0.06765 |
| H | -4.31618 | -2.96636 | -0.42888 |
| H | -2.86851 | -3.9447  | -0.41603 |
| H | -3.31566 | -3.0274  | 1.00231  |
| O | -1.0549  | -1.93295 | 1.36245  |
| O | -1.26978 | -3.15806 | 1.80441  |
| H | -1.33985 | -3.14568 | 2.76177  |

P50

|   |         |          |          |
|---|---------|----------|----------|
| C | 0.8675  | -0.36028 | -0.25013 |
| O | 0.65275 | -1.31592 | -0.94955 |

|   |          |          |          |
|---|----------|----------|----------|
| O | 2.02643  | -0.19992 | 0.44225  |
| C | 2.96104  | -1.1941  | 0.35771  |
| H | 3.90897  | -0.92207 | 0.7933   |
| H | 2.82566  | -1.94799 | -0.40227 |
| C | -0.05465 | 0.8412   | -0.08347 |
| C | 0.3931   | 1.89823  | -1.10705 |
| H | -0.25361 | 2.77776  | -1.03868 |
| H | 1.42032  | 2.21081  | -0.90268 |
| H | 0.34373  | 1.50567  | -2.12683 |
| C | 0.00173  | 1.41492  | 1.33632  |
| H | 1.00104  | 1.79104  | 1.56197  |
| H | -0.71047 | 2.24177  | 1.41662  |
| H | -0.26769 | 0.6602   | 2.07746  |
| C | -1.48162 | 0.38017  | -0.43389 |
| H | -1.74963 | -0.45131 | 0.18396  |
| H | -1.51932 | 0.08713  | -1.46229 |
| O | -2.39811 | 1.45491  | -0.21059 |
| O | -3.62066 | 1.0622   | -0.51644 |
| H | -4.23538 | 1.78495  | -0.37032 |

#### P51

|   |          |          |          |
|---|----------|----------|----------|
| C | -0.85793 | -0.17499 | 0.15795  |
| O | -0.64699 | -0.90909 | 1.08746  |
| O | -2.0034  | -0.2074  | -0.57194 |
| C | -2.94539 | -1.13951 | -0.23322 |
| H | -3.88264 | -1.00041 | -0.74736 |
| H | -2.8323  | -1.64671 | 0.71259  |
| C | -0.42536 | 2.27048  | 0.26294  |
| H | 0.20773  | 3.08787  | -0.08985 |
| H | -1.45431 | 2.47451  | -0.03964 |
| H | -0.38334 | 2.24662  | 1.35581  |
| C | 0.05476  | 0.93473  | -0.32038 |
| H | -0.001   | 0.97148  | -1.41311 |
| C | 1.49802  | 0.61732  | 0.11303  |
| H | 1.76878  | -0.35752 | -0.23522 |
| H | 1.56426  | 0.64582  | 1.1806   |
| O | 2.38779  | 1.58731  | -0.44582 |
| O | 3.63603  | 1.21617  | -0.23009 |
| H | 4.23337  | 1.86605  | -0.60753 |

#### P52

|   |          |          |          |
|---|----------|----------|----------|
| C | -1.04643 | -0.11754 | 0.06038  |
| O | -0.96225 | -1.1612  | 0.66419  |
| O | -2.22303 | 0.34381  | -0.42587 |
| C | -3.3405  | -0.4258  | -0.24972 |
| H | -4.25012 | 0.08058  | -0.52859 |
| H | -3.28009 | -1.25188 | 0.44145  |
| C | -0.16353 | 2.17847  | 0.50122  |
| H | 0.56437  | 2.92739  | 0.18422  |
| H | -1.16267 | 2.56119  | 0.28647  |
| H | -0.06796 | 2.04192  | 1.58312  |
| C | 1.4139   | 0.19689  | 0.12215  |
| H | 1.40413  | -0.09595 | 1.17699  |
| O | 1.5098   | -0.99734 | -0.6586  |
| O | 1.65484  | -2.11391 | 0.20657  |
| H | 0.72617  | -2.24996 | 0.46794  |
| C | 0.07842  | 0.85311  | -0.23288 |
| H | 0.05666  | 1.0357   | -1.31509 |
| C | 2.6219   | 1.07153  | -0.17357 |
| H | 2.61816  | 1.38821  | -1.22113 |
| H | 2.64476  | 1.95993  | 0.46241  |
| H | 3.52917  | 0.49207  | 0.00656  |

## P53

|   |          |          |          |
|---|----------|----------|----------|
| C | 1.35726  | -0.51768 | -0.03129 |
| O | 1.64628  | -0.97805 | 1.04359  |
| O | 2.1302   | 0.39198  | -0.67753 |
| C | 3.26267  | 0.82202  | -0.04733 |
| H | 3.89731  | 1.42231  | -0.67872 |
| H | 3.59559  | 0.27418  | 0.82073  |
| C | 0.09914  | -0.86323 | -0.84941 |
| H | -0.47883 | 0.02344  | -1.00648 |
| H | 0.3895   | -1.27183 | -1.79473 |
| C | -0.74506 | -1.89683 | -0.0809  |
| C | -1.16289 | -1.30878 | 1.27969  |
| H | -0.50061 | -1.66516 | 2.0408   |
| H | -1.1148  | -0.24073 | 1.23653  |
| H | -2.16355 | -1.61186 | 1.50708  |
| O | -1.91335 | -2.21764 | -0.84055 |
| O | -2.67336 | -1.14441 | -0.95439 |
| H | -3.46414 | -1.36312 | -1.45283 |
| C | 0.08675  | -3.17301 | 0.14509  |
| H | 0.83943  | -3.24686 | -0.61183 |
| H | 0.55198  | -3.12971 | 1.10768  |
| H | -0.55321 | -4.02915 | 0.09643  |

## P54

|   |          |          |          |
|---|----------|----------|----------|
| C | -1.14444 | -0.48335 | 0.13406  |
| O | -1.26013 | -0.45358 | 1.33056  |
| O | -1.86924 | 0.29985  | -0.70633 |
| C | -2.777   | 1.15419  | -0.14566 |
| H | -3.17411 | 1.86691  | -0.85098 |
| H | -2.71095 | 1.32321  | 0.91855  |
| C | -0.21807 | -1.43407 | -0.64669 |
| H | -0.8079  | -2.08321 | -1.25958 |
| H | 0.44133  | -0.86154 | -1.26499 |
| C | 0.60815  | -2.27454 | 0.34455  |
| H | -0.05047 | -2.86206 | 0.94949  |
| H | 1.18291  | -1.62456 | 0.97071  |
| C | 1.55506  | -3.20492 | -0.43606 |
| H | 0.98062  | -3.85066 | -1.06688 |
| H | 2.21781  | -2.61718 | -1.03625 |
| O | 2.31631  | -3.99132 | 0.48426  |
| O | 3.12715  | -4.79005 | -0.1843  |
| H | 3.63805  | -5.31813 | 0.43353  |

## P55

|   |          |          |          |
|---|----------|----------|----------|
| C | -1.4423  | -0.56301 | 0.12616  |
| O | -1.50468 | -0.63017 | 1.32528  |
| O | -2.25606 | 0.22806  | -0.62032 |
| C | -3.18351 | 0.98192  | 0.04254  |
| H | -3.66113 | 1.7124   | -0.59113 |
| H | -3.07145 | 1.08392  | 1.11153  |
| C | -0.48813 | -1.38307 | -0.76191 |
| H | -1.05851 | -2.02248 | -1.40279 |
| H | 0.10476  | -0.71952 | -1.35612 |
| C | 0.43363  | -2.23787 | 0.12763  |
| H | 0.99094  | -1.59957 | 0.78098  |
| H | -0.15817 | -2.91387 | 0.70874  |
| C | 1.40503  | -3.03842 | -0.75956 |
| H | 2.00078  | -2.36229 | -1.33648 |
| C | 2.32134  | -3.89944 | 0.12962  |
| H | 2.99686  | -4.455   | -0.48676 |
| H | 2.87814  | -3.26539 | 0.78753  |

|   |         |          |          |
|---|---------|----------|----------|
| H | 1.72566 | -4.57618 | 0.70589  |
| O | 0.66002 | -3.88588 | -1.638   |
| O | 1.47979 | -4.4534  | -2.50304 |
| H | 0.9974  | -5.09733 | -3.02673 |

P56

|   |          |          |          |
|---|----------|----------|----------|
| C | -0.69688 | 0.86595  | 0.0701   |
| O | -0.8731  | 1.3725   | 1.14636  |
| O | 0.2384   | 1.29228  | -0.8185  |
| C | 1.13729  | 2.22612  | -0.37967 |
| H | 1.95562  | 2.36796  | -1.06811 |
| H | 1.22571  | 2.35579  | 0.68915  |
| C | -1.45597 | -0.35626 | -0.47909 |
| H | -0.77074 | -1.16454 | -0.62752 |
| C | -2.54107 | -0.78147 | 0.52757  |
| H | -3.21456 | 0.03366  | 0.69154  |
| H | -2.08064 | -1.05554 | 1.45374  |
| C | -3.31951 | -1.98538 | -0.03477 |
| H | -2.64514 | -2.79876 | -0.20368 |
| H | -3.78427 | -1.70973 | -0.9583  |
| C | -2.11617 | 0.01008  | -1.8213  |
| H | -2.60389 | -0.85206 | -2.22594 |
| H | -2.83577 | 0.78633  | -1.66471 |
| H | -1.36755 | 0.35052  | -2.50583 |
| O | -4.32249 | -2.38464 | 0.90306  |
| O | -4.89738 | -3.49741 | 0.48636  |
| H | -5.57105 | -3.76518 | 1.11571  |

P57

|   |          |          |          |
|---|----------|----------|----------|
| C | -1.13135 | -0.72149 | 0.16662  |
| O | -1.3125  | -0.70936 | 1.35547  |
| O | -2.06963 | -0.33163 | -0.7352  |
| C | -3.26975 | 0.10203  | -0.24569 |
| H | -3.89444 | 0.55026  | -1.00218 |
| H | -3.321   | 0.34322  | 0.80533  |
| C | 1.38694  | -0.78485 | 0.23034  |
| H | 1.191    | -0.89936 | 1.30238  |
| C | 0.12044  | -1.2135  | -0.51842 |
| H | 0.1329   | -0.86806 | -1.55626 |
| H | 0.05777  | -2.30869 | -0.53453 |
| C | 2.58544  | -1.64414 | -0.16865 |
| H | 2.41501  | -2.69119 | 0.09433  |
| H | 2.76015  | -1.59127 | -1.24868 |
| C | 1.70467  | 0.69443  | -0.05666 |
| H | 1.50127  | 0.90995  | -1.08481 |
| H | 1.09625  | 1.31712  | 0.56542  |
| H | 2.73727  | 0.88404  | 0.14998  |
| O | 3.77712  | -1.21136 | 0.49277  |
| O | 4.75137  | -2.06856 | 0.25099  |
| H | 5.55192  | -1.77693 | 0.69334  |

P58

|   |          |          |          |
|---|----------|----------|----------|
| C | -1.56593 | 0.11348  | 0.002    |
| O | -1.64576 | 1.31847  | 0.01585  |
| O | -0.37988 | -0.53652 | 0.02191  |
| C | -2.68815 | -0.79973 | -0.02047 |
| H | -2.52671 | -1.86658 | -0.05224 |
| H | -3.68105 | -0.37851 | -0.04116 |
| C | 0.75242  | 0.30305  | 0.01396  |
| H | 0.77577  | 0.91382  | -0.89282 |
| H | 0.78579  | 0.93654  | 0.90351  |
| O | 1.81259  | -0.61913 | 0.01131  |

|   |         |          |          |
|---|---------|----------|----------|
| O | 2.97126 | 0.21079  | -0.09117 |
| H | 3.59056 | -0.29503 | 0.44654  |

P59

|   |          |          |          |
|---|----------|----------|----------|
| C | 0.60909  | 0.49296  | 0.12655  |
| O | -0.15503 | 1.44088  | 0.24446  |
| O | 0.21365  | -0.79577 | 0.17169  |
| C | 2.04243  | 0.63529  | -0.07773 |
| H | 2.31818  | 0.17514  | -1.00354 |
| C | 2.4092   | 2.13042  | -0.11831 |
| H | 2.12714  | 2.59204  | 0.80486  |
| H | 3.46438  | 2.23506  | -0.26163 |
| H | 1.89091  | 2.603    | -0.92636 |
| C | -1.16553 | -1.05387 | 0.44765  |
| H | -1.7705  | -0.61741 | -0.31943 |
| H | -1.42599 | -0.62686 | 1.39355  |
| O | -1.38809 | -2.46596 | 0.48463  |
| O | -2.66263 | -2.70482 | 0.73144  |
| H | -2.81212 | -3.6528  | 0.75586  |

P60

|   |          |          |          |
|---|----------|----------|----------|
| C | 0.45452  | 0.3578   | -0.00453 |
| O | 0.38984  | 1.56687  | 0.02235  |
| O | -0.64928 | -0.42883 | -0.01766 |
| C | 1.67791  | -0.41331 | -0.02365 |
| H | 1.60326  | -1.49344 | -0.05403 |
| C | 2.99013  | 0.2808   | -0.01548 |
| H | 3.0115   | 0.97805  | 0.83101  |
| H | 3.04802  | 0.92783  | -0.901   |
| C | 4.17654  | -0.67697 | 0.03196  |
| H | 5.11846  | -0.12842 | 0.03627  |
| H | 4.1434   | -1.2961  | 0.93042  |
| H | 4.17786  | -1.3405  | -0.83491 |
| C | -1.8698  | 0.27096  | -0.00818 |
| H | -1.9736  | 0.89089  | -0.9021  |
| H | -1.96273 | 0.88303  | 0.89346  |
| O | -2.81966 | -0.76893 | -0.01284 |
| O | -4.07711 | -0.10885 | -0.0698  |
| H | -4.4924  | -0.41905 | 0.74379  |

P61

|   |          |          |          |
|---|----------|----------|----------|
| C | 0.3524   | -0.38192 | -0.29396 |
| O | 0.56204  | 0.75391  | -0.69893 |
| O | 1.3262   | -1.2251  | 0.10237  |
| C | -0.96313 | -0.97498 | -0.18878 |
| H | -1.03089 | -1.98566 | 0.19863  |
| C | -2.22977 | -0.18732 | -0.57194 |
| H | -2.30719 | 0.68476  | 0.04319  |
| H | -2.17072 | 0.10511  | -1.59951 |
| C | -3.46998 | -1.07569 | -0.36149 |
| H | -3.53294 | -1.36232 | 0.66748  |
| H | -3.38921 | -1.95119 | -0.97132 |
| C | -4.73579 | -0.29148 | -0.75431 |
| H | -5.59749 | -0.90873 | -0.60811 |
| H | -4.81657 | 0.58401  | -0.14447 |
| H | -4.67282 | -0.00483 | -1.78327 |
| C | 2.67948  | -0.78322 | -0.03278 |
| H | 2.82964  | 0.09317  | 0.56244  |
| H | 2.87967  | -0.55598 | -1.05903 |
| O | 3.56452  | -1.81628 | 0.40811  |
| O | 4.81307  | -1.40036 | 0.30547  |
| H | 5.40714  | -2.09323 | 0.60312  |



**P62**

|   |          |          |          |
|---|----------|----------|----------|
| C | -0.14945 | 0.2207   | -0.08432 |
| O | -0.46791 | -0.83141 | -0.6233  |
| O | -1.03383 | 1.17367  | 0.27205  |
| C | 2.35672  | -0.31642 | -0.05929 |
| H | 1.94716  | -1.24816 | -0.46214 |
| C | 3.14768  | -0.62045 | 1.2214   |
| H | 3.98438  | -1.28856 | 0.99881  |
| H | 3.55579  | 0.30106  | 1.64997  |
| H | 2.51691  | -1.09797 | 1.97506  |
| C | 1.21174  | 0.58459  | 0.2417   |
| H | 1.38106  | 1.55004  | 0.70885  |
| C | 3.26935  | 0.32508  | -1.1172  |
| H | 3.68261  | 1.26957  | -0.74803 |
| H | 4.10423  | -0.34233 | -1.34876 |
| H | 2.72367  | 0.52745  | -2.04203 |
| C | -2.4068  | 0.96295  | -0.06775 |
| H | -2.76173 | 0.07649  | 0.41507  |
| H | -2.49896 | 0.85285  | -1.12807 |
| O | -3.18225 | 2.08409  | 0.36425  |
| O | -4.45365 | 1.87806  | 0.0753   |
| H | -4.9745  | 2.62984  | 0.3671   |

**P63**

|   |          |          |          |
|---|----------|----------|----------|
| C | -0.75562 | -0.50943 | -0.0102  |
| O | -0.6673  | -1.71258 | -0.00745 |
| O | 0.34469  | 0.2879   | -0.00534 |
| C | -1.98784 | 0.24911  | -0.01832 |
| C | -1.97083 | 1.73903  | -0.00167 |
| H | -1.18835 | 2.13911  | -0.64822 |
| H | -2.93863 | 2.13781  | -0.30932 |
| H | -1.76047 | 2.11084  | 1.00911  |
| C | -3.27621 | -0.4916  | 0.01231  |
| H | -3.88074 | -0.23885 | -0.86619 |
| H | -3.11387 | -1.56753 | 0.03578  |
| H | -3.86404 | -0.19738 | 0.8896   |
| C | 1.56836  | -0.40309 | -0.0004  |
| H | 1.68036  | -1.01674 | -0.89853 |
| H | 1.67148  | -1.01654 | 0.89909  |
| O | 2.50702  | 0.64421  | 0.00518  |
| O | 3.76204  | -0.03835 | 0.02822  |
| H | 4.35542  | 0.69572  | -0.16656 |

**P64**

|   |          |          |          |
|---|----------|----------|----------|
| C | -0.3428  | -0.45845 | -0.21966 |
| O | -0.28678 | -1.66997 | -0.26117 |
| O | 0.77294  | 0.30514  | -0.06363 |
| C | -1.54661 | 0.34094  | -0.321   |
| C | -1.48208 | 1.82538  | -0.19734 |
| H | -2.43255 | 2.27886  | -0.48226 |
| H | -1.25418 | 2.12435  | 0.83355  |
| H | -0.6833  | 2.24014  | -0.81575 |
| C | -2.85564 | -0.36034 | -0.44344 |
| H | -3.43525 | 0.11014  | -1.24668 |
| H | -2.68739 | -1.40341 | -0.71218 |
| C | -3.65866 | -0.27953 | 0.8663   |
| H | -4.63013 | -0.76295 | 0.74925  |
| H | -3.121   | -0.78092 | 1.67384  |
| H | -3.82872 | 0.75886  | 1.16078  |
| C | 1.97389  | -0.41777 | 0.02672  |
| H | 1.9791   | -1.06313 | 0.91034  |

|   |         |          |          |
|---|---------|----------|----------|
| H | 2.15122 | -1.00597 | -0.87732 |
| O | 2.93538 | 0.60729  | 0.14307  |
| O | 4.18593 | -0.06635 | 0.12642  |
| H | 4.55377 | 0.1938   | 0.97939  |

P65

|   |          |          |          |
|---|----------|----------|----------|
| C | 0.72406  | -0.11217 | -0.09514 |
| O | 0.36163  | 1.02219  | -0.31341 |
| O | -0.1001  | -1.16573 | -0.04648 |
| C | 2.1535   | -0.52802 | 0.15983  |
| H | 2.1639   | -1.0338  | 1.13756  |
| H | 2.39295  | -1.32358 | -0.5607  |
| C | 3.10898  | 0.60612  | 0.09451  |
| H | 2.74522  | 1.6113   | -0.06221 |
| H | 4.16551  | 0.43016  | 0.23816  |
| C | -1.48377 | -0.9489  | -0.33518 |
| H | -1.89319 | -0.2623  | 0.37606  |
| H | -1.58329 | -0.5435  | -1.32039 |
| O | -2.18728 | -2.19147 | -0.25773 |
| O | -3.46736 | -1.98946 | -0.50869 |
| H | -3.93982 | -2.82347 | -0.45571 |

P66

|   |          |          |          |
|---|----------|----------|----------|
| C | -0.41468 | 0.13063  | -0.02815 |
| O | 0.08892  | 1.12274  | 0.45139  |
| O | 0.25904  | -1.00073 | -0.27384 |
| C | -1.87683 | -0.00858 | -0.40209 |
| H | -1.89079 | -0.39951 | -1.43001 |
| C | -2.58229 | 1.29921  | -0.32289 |
| H | -2.10721 | 2.15304  | 0.13831  |
| H | -3.61401 | 1.36377  | -0.64196 |
| C | -2.52894 | -1.08247 | 0.4996   |
| H | -3.57862 | -1.20188 | 0.22309  |
| H | -2.02353 | -2.04398 | 0.38926  |
| H | -2.48707 | -0.77238 | 1.54707  |
| C | 1.63137  | -1.06743 | 0.12259  |
| H | 2.19037  | -0.31966 | -0.40015 |
| H | 1.70688  | -0.89761 | 1.17632  |
| O | 2.15571  | -2.36043 | -0.19063 |
| O | 3.44876  | -2.38733 | 0.07334  |
| H | 3.80238  | -3.25281 | -0.14459 |

P67

|   |          |          |          |
|---|----------|----------|----------|
| C | -0.53256 | 0.60939  | -0.01842 |
| O | -0.40632 | 1.80276  | -0.02057 |
| O | 0.53041  | -0.22261 | -0.00343 |
| C | -1.84261 | -0.16561 | -0.00875 |
| C | -2.98594 | 0.78664  | -0.13079 |
| H | -2.83324 | 1.85488  | -0.09717 |
| H | -3.98816 | 0.38349  | -0.19395 |
| C | -1.92599 | -0.93801 | 1.32878  |
| H | -2.86911 | -1.48744 | 1.36296  |
| H | -1.10114 | -1.64764 | 1.41649  |
| H | -1.90021 | -0.25087 | 2.17716  |
| C | -1.85064 | -1.1737  | -1.17583 |
| H | -1.7507  | -0.66105 | -2.13482 |
| H | -1.03885 | -1.89505 | -1.07305 |
| H | -2.80183 | -1.71058 | -1.17397 |
| C | 1.78676  | 0.41452  | 0.00451  |
| H | 1.91433  | 1.0399   | -0.88226 |
| H | 1.91761  | 1.0061   | 0.91523  |
| O | 2.67973  | -0.67464 | -0.02321 |

|   |         |          |          |
|---|---------|----------|----------|
| O | 3.96796 | -0.07849 | -0.08055 |
| H | 4.38295 | -0.44721 | 0.70847  |

P68

|   |          |          |          |
|---|----------|----------|----------|
| C | 0.02934  | 0.22005  | -0.07278 |
| O | 0.59061  | 1.08978  | 0.55791  |
| O | 0.61452  | -0.92348 | -0.45093 |
| C | -1.45598 | 0.2567   | -0.47784 |
| H | -1.98053 | -0.53307 | 0.01815  |
| C | -2.06537 | 1.61161  | -0.0723  |
| H | -1.99948 | 1.72891  | 0.98921  |
| H | -1.52797 | 2.40245  | -0.55257 |
| C | -3.54306 | 1.65946  | -0.5033  |
| H | -4.07875 | 0.8636   | -0.02944 |
| H | -3.9687  | 2.59762  | -0.21421 |
| H | -3.60841 | 1.5504   | -1.56572 |
| C | -1.57695 | 0.07512  | -2.00231 |
| H | -2.61021 | 0.07238  | -2.28029 |
| H | -1.12838 | -0.85347 | -2.2876  |
| C | 1.95267  | -1.17047 | -0.01133 |
| H | 2.60016  | -0.40975 | -0.39468 |
| H | 1.98438  | -1.1602  | 1.05815  |
| O | 2.3831   | -2.44786 | -0.48872 |
| O | 3.6114   | -2.68473 | -0.06731 |
| H | 3.89971  | -3.54304 | -0.38634 |

P69

|   |          |          |          |
|---|----------|----------|----------|
| C | 0.24345  | 0.76083  | 0.13603  |
| O | -0.54045 | 1.55522  | -0.33461 |
| O | -0.03817 | -0.65552 | 0.30477  |
| C | 1.67523  | 1.10407  | 0.58746  |
| H | 1.80045  | 0.83124  | 1.61449  |
| H | 2.37753  | 0.56459  | -0.01307 |
| C | 1.91601  | 2.61644  | 0.42505  |
| H | 1.80113  | 2.88744  | -0.60367 |
| C | 3.34266  | 2.96203  | 0.89071  |
| H | 3.51179  | 4.01198  | 0.77288  |
| H | 3.45587  | 2.69593  | 1.92089  |
| H | 4.05157  | 2.41828  | 0.3019   |
| C | -1.28561 | -1.15421 | -0.18524 |
| H | -2.08986 | -0.66545 | 0.32389  |
| H | -1.35891 | -0.96186 | -1.23526 |
| O | -1.36026 | -2.56314 | 0.04762  |
| O | -2.5241  | -3.01886 | -0.37688 |
| H | -2.57509 | -3.96434 | -0.21855 |

P70

|   |          |          |          |
|---|----------|----------|----------|
| C | -0.01389 | 0.02918  | 0.05626  |
| O | -0.4162  | -0.94823 | 0.64912  |
| O | -0.81331 | 1.00669  | -0.39274 |
| C | 2.30002  | -0.87504 | -0.0455  |
| H | 1.92661  | -1.67109 | 0.58741  |
| C | 3.73833  | -0.82655 | -0.42754 |
| H | 4.13988  | -1.82838 | -0.59993 |
| H | 3.88941  | -0.23783 | -1.33994 |
| H | 4.3633   | -0.36523 | 0.3532   |
| C | 1.44086  | 0.32979  | -0.23593 |
| H | 1.48726  | 0.67169  | -1.2802  |
| C | 1.88204  | 1.52005  | 0.65068  |
| H | 1.81575  | 1.24763  | 1.7077   |
| H | 2.92021  | 1.77655  | 0.42806  |
| H | 1.25761  | 2.39696  | 0.46607  |

|   |          |         |          |
|---|----------|---------|----------|
| C | -2.20582 | 0.93315 | -0.07589 |
| H | -2.62356 | 0.0477  | -0.50759 |
| H | -2.3288  | 0.90414 | 0.98663  |
| O | -2.87571 | 2.08175 | -0.60208 |
| O | -4.17513 | 1.96419 | -0.40188 |
| H | -4.62549 | 2.73212 | -0.76113 |

#### P71

|   |          |          |          |
|---|----------|----------|----------|
| C | 0.29597  | 0.68321  | -0.18801 |
| O | 1.14593  | 1.45565  | 0.19671  |
| O | 0.46651  | -0.64493 | -0.26299 |
| C | 1.69608  | -1.19789 | 0.23832  |
| H | 1.81694  | -0.93997 | 1.29315  |
| H | 1.56793  | -2.26976 | 0.08351  |
| O | 2.80812  | -0.79093 | -0.4778  |
| O | 3.53344  | 0.18008  | 0.26783  |
| H | 2.93793  | 0.95174  | 0.19498  |
| C | -1.13495 | 1.08886  | -0.58742 |
| H | -1.33992 | 0.74341  | -1.57916 |
| H | -1.8334  | 0.65051  | 0.09443  |
| C | -1.26563 | 2.6226   | -0.54082 |
| H | -1.08013 | 2.96626  | 0.45537  |
| C | -2.68812 | 3.0298   | -0.96778 |
| H | -3.40061 | 2.58425  | -0.3054  |
| H | -2.87076 | 2.6931   | -1.96687 |
| C | -2.82231 | 4.56286  | -0.91014 |
| H | -3.81095 | 4.84573  | -1.2059  |
| H | -2.63875 | 4.89965  | 0.08875  |
| H | -2.11045 | 5.00838  | -1.57322 |

#### P72

|   |          |          |          |
|---|----------|----------|----------|
| C | 0.01346  | -0.24101 | 0.55197  |
| O | 0.48287  | -1.27906 | 0.13356  |
| O | 0.58659  | 0.95966  | 0.38928  |
| C | 1.78619  | 1.0304   | -0.40092 |
| H | 1.59374  | 0.64192  | -1.40395 |
| H | 2.02108  | 2.09518  | -0.40352 |
| O | 2.85234  | 0.35618  | 0.16889  |
| O | 3.07774  | -0.86604 | -0.52468 |
| H | 2.30391  | -1.38855 | -0.23508 |
| C | -1.36842 | -0.13074 | 1.22267  |
| H | -1.27271 | 0.38821  | 2.15349  |
| H | -2.03436 | 0.40753  | 0.58105  |
| C | -1.92959 | -1.5421  | 1.47715  |
| C | -3.284   | -1.43301 | 2.20192  |
| H | -3.96549 | -0.86773 | 1.60115  |
| H | -3.68102 | -2.41309 | 2.36535  |
| H | -3.14653 | -0.94241 | 3.14283  |
| C | -0.94213 | -2.33722 | 2.3514   |
| H | -0.3263  | -2.95    | 1.72678  |
| H | -0.32645 | -1.65744 | 2.90251  |
| H | -1.48756 | -2.95668 | 3.03234  |

#### P73

|   |          |          |          |
|---|----------|----------|----------|
| C | 0.52215  | 0.94554  | -0.08668 |
| O | 0.18116  | 2.04641  | 0.26505  |
| O | -0.35795 | -0.06841 | -0.24273 |
| C | -1.6978  | 0.2764   | 0.0333   |
| H | -2.0644  | 1.0235   | -0.67804 |
| H | -1.798   | 0.65454  | 1.05769  |
| O | -2.37415 | -0.9469  | -0.13423 |
| O | -3.74801 | -0.61148 | 0.01937  |

|   |          |          |          |
|---|----------|----------|----------|
| H | -3.95681 | -1.06529 | 0.84894  |
| C | 1.95896  | 0.49845  | -0.41423 |
| H | 2.24323  | -0.29736 | 0.2421   |
| H | 2.00436  | 0.15835  | -1.42773 |
| C | 2.92127  | 1.68621  | -0.22774 |
| H | 2.87637  | 2.02587  | 0.78592  |
| H | 2.63658  | 2.48228  | -0.88359 |
| C | 4.35794  | 1.23938  | -0.55625 |
| H | 4.64258  | 0.44322  | 0.0995   |
| H | 4.40286  | 0.89984  | -1.56996 |

#### P74

|   |          |          |          |
|---|----------|----------|----------|
| C | 0.29517  | -0.45878 | 0.05526  |
| O | 0.21581  | -1.58193 | 0.4871   |
| O | -0.79656 | 0.28884  | -0.2161  |
| C | -2.02474 | -0.34441 | 0.06744  |
| H | -2.11261 | -0.56925 | 1.13544  |
| H | -2.13127 | -1.26572 | -0.51805 |
| O | -2.96853 | 0.62486  | -0.32149 |
| O | -4.22319 | 0.05588  | 0.03186  |
| H | -4.60339 | -0.1108  | -0.84315 |
| C | 1.5706   | 0.30145  | -0.23314 |
| H | 1.50676  | 0.63553  | -1.27754 |
| C | 2.78391  | -0.61798 | -0.06279 |
| H | 2.60639  | -1.53956 | -0.63922 |
| H | 2.84002  | -0.94038 | 0.98337  |
| C | 4.05331  | 0.03822  | -0.48253 |
| H | 4.08014  | 0.63683  | -1.38667 |
| H | 4.99984  | -0.25256 | -0.04619 |
| C | 1.6488   | 1.54249  | 0.66612  |
| H | 1.66719  | 1.24566  | 1.71963  |
| H | 2.56969  | 2.09103  | 0.45481  |
| H | 0.79468  | 2.20213  | 0.50441  |

#### P75

|   |          |          |          |
|---|----------|----------|----------|
| C | -0.17423 | 0.08047  | -0.33123 |
| O | -0.1707  | 1.14037  | -0.90675 |
| O | 0.95694  | -0.50889 | 0.1074   |
| C | 2.13894  | 0.20948  | -0.17445 |
| H | 2.1078   | 1.20354  | 0.28754  |
| H | 2.29235  | 0.30448  | -1.25446 |
| O | 3.135    | -0.59714 | 0.40695  |
| O | 4.35398  | 0.05757  | 0.07491  |
| H | 4.65519  | 0.33882  | 0.95114  |
| C | -2.70671 | 0.01155  | -0.18556 |
| H | -2.67162 | 0.49119  | -1.17258 |
| C | -3.86982 | -0.92385 | -0.12965 |
| H | -4.09277 | -1.58065 | -0.96214 |
| H | -4.38304 | -1.10155 | 0.80874  |
| C | -1.38717 | -0.76655 | -0.03142 |
| H | -1.28658 | -1.18209 | 0.97684  |
| H | -1.35495 | -1.62021 | -0.71952 |
| C | -2.81929 | 1.10329  | 0.88066  |
| H | -2.82206 | 0.65699  | 1.88185  |
| H | -1.98584 | 1.80593  | 0.81281  |
| H | -3.75059 | 1.66195  | 0.75963  |

#### P76

|   |          |          |          |
|---|----------|----------|----------|
| C | -0.36566 | 0.64388  | 0.04448  |
| O | -1.11256 | 1.47875  | -0.41807 |
| O | -0.73735 | -0.75742 | 0.23943  |
| C | 1.07784  | 0.92192  | 0.5034   |

|   |          |          |          |
|---|----------|----------|----------|
| H | 1.17079  | 0.69556  | 1.54504  |
| H | 1.75413  | 0.31013  | -0.05628 |
| C | 1.41421  | 2.40629  | 0.26864  |
| H | 0.74456  | 3.01787  | 0.83648  |
| H | 1.31115  | 2.63518  | -0.7715  |
| C | 2.86269  | 2.68101  | 0.71365  |
| H | 3.53242  | 2.0702   | 0.14508  |
| C | 3.19855  | 4.16572  | 0.48032  |
| H | 2.53054  | 4.77646  | 1.05098  |
| H | 4.20583  | 4.356    | 0.78703  |
| H | 3.09263  | 4.39627  | -0.55916 |
| C | -2.03142 | -1.17638 | -0.20186 |
| H | -2.78323 | -0.62895 | 0.3273   |
| H | -2.12763 | -0.99121 | -1.25131 |
| O | -2.19218 | -2.57441 | 0.05221  |
| O | -3.39494 | -2.95704 | -0.33425 |
| H | -3.5035  | -3.89521 | -0.16206 |

#### P77

|   |          |          |          |
|---|----------|----------|----------|
| C | 0.07072  | 0.28898  | -0.00495 |
| O | 0.09196  | 1.49345  | 0.02725  |
| O | 1.19478  | -0.45789 | -0.02507 |
| C | 2.39294  | 0.28733  | -0.00969 |
| H | 2.45418  | 0.90546  | 0.89403  |
| H | 2.4725   | 0.91969  | -0.89998 |
| O | 3.37921  | -0.71643 | -0.01384 |
| O | 4.60842  | -0.00208 | -0.07049 |
| H | 4.98009  | -0.20847 | 0.79951  |
| C | -1.16198 | -0.57801 | -0.02876 |
| H | -1.11677 | -1.19429 | -0.93476 |
| H | -1.0929  | -1.27872 | 0.81167  |
| C | -2.4458  | 0.23821  | 0.02677  |
| H | -2.46551 | 0.93839  | -0.8156  |
| H | -2.4501  | 0.85287  | 0.93254  |
| C | -4.95666 | 0.13901  | 0.03064  |
| H | -5.88524 | -0.31363 | 0.35385  |
| H | -5.00827 | 1.10601  | -0.45663 |
| C | -3.69277 | -0.6478  | -0.00554 |
| H | -3.66663 | -1.35411 | 0.83499  |
| H | -3.65494 | -1.27596 | -0.9133  |

#### P78

|   |          |          |          |
|---|----------|----------|----------|
| C | -1.05249 | -0.57263 | 0.32788  |
| O | -1.2318  | -1.60994 | 0.90198  |
| O | -1.96041 | -0.00229 | -0.47902 |
| C | -3.18371 | -0.73305 | -0.63012 |
| H | -3.66523 | -0.86285 | 0.33897  |
| H | -3.80354 | -0.13689 | -1.29423 |
| H | -2.98279 | -1.71165 | -1.06536 |
| C | 0.2436   | 0.22354  | 0.4306   |
| H | 0.41421  | 0.42056  | 1.49535  |
| C | 1.3988   | -0.58619 | -0.15234 |
| H | 1.23399  | -0.71726 | -1.22645 |
| C | 2.76069  | 0.08974  | 0.09428  |
| H | 2.74924  | 1.07958  | -0.36588 |
| H | 2.87466  | 0.23624  | 1.175    |
| O | 0.20351  | 1.44112  | -0.27555 |
| O | -0.70226 | 2.31129  | 0.38251  |
| H | -1.5215  | 2.13229  | -0.10117 |
| C | 3.92665  | -0.75478 | -0.45247 |
| H | 4.84965  | -0.24091 | -0.28247 |
| H | 3.94746  | -1.70036 | 0.04787  |

**H**

**3.79294 -0.90984 -1.5027**
